# Supplementary material
Source: publisher site journal article supplement (https://www.spandidos-publications.com/6091/downloadSupplementary)
Supplement: Supplementary file 1 [file downloadSupplementary]

## Sheet: Sheet1
Table SIV. Carbohydrate metabolism-associated pathway of differentially expressed genes involved in hepatocellular carcinoma.
ID	Description	Gene ratio	Bg ratio	P-value	Adjusted P-value	q-value	Gene ID	Gene count
hsa00280	Valine, leucine and isoleucine degradation	40/2069	48/8160	4.42x10^-17	1.50x10^-14	1.26x10^-14	10449/5095/35/3155/18/30/219/3158/3033/1892/4329/1629/64902/594/1962/223/34/217/3712/36/586/38/27034/593/4594/56922/3030/197322/224/5096/549/84693/501/39/11112/316/3028/3032/64087/65985	40
hsa00250	Alanine, aspartate and glutamate metabolism	24/2069	37/8160	4.48x10^-7	1.89x10^-5	1.59x10^-5	2806/27165/443/18/56954/445/64902/7915/2346/84706/158/2673/440/8659/189/790/435/2805/1373/159/2875/122622/80150/2744	24
hsa00410	beta-Alanine metabolism	21/2069	31/8160	8.13x10^-7	3.05x10^-5	2.57x10^-5	35/84735/18/219/1892/4329/1806/8310/1807/51380/1962/223/23417/217/55748/51/3030/224/501/51733/54498	21
hsa01230	Biosynthesis of amino acids	38/2069	75/8160	2.03x10^-6	5.27x10^-5	4.43x10^-5	2806/2027/6470/10993/26227/7086/875/445/29968/48/4143/5315/586/5831/3418/5053/84706/5832/440/29920/383/5009/229/95/435/113675/5230/2597/6472/2805/1491/1373/2875/5091/4548/230/226/22934	38
hsa00630	Glyoxylate and dicarboxylate metabolism	20/2069	30/8160	2.20x10^-6	5.32x10^-5	4.47x10^-5	51179/847/6470/5095/112817/48/9380/54363/275/132158/38/2731/4594/189/5096/84693/2653/81888/6472/39	20
hsa01200	Carbon metabolism	51/2069	115/8160	6.49x10^-6	1.22x10^-4	1.02x10^-4	2806/51179/847/2027/6470/5095/35/10993/55753/2203/26227/414328/7086/1892/4329/6389/9104/8310/29968/48/26007/54363/5315/275/3418/132158/8801/38/2731/84706/51/4594/189/229/5096/113675/84693/2098/5230/2653/2597/6472/39/4200/2805/1373/2875/5091/230/226/22934	51
hsa00650	Butanoate metabolism	18/2069	28/8160	1.54x10^-5	2.74x10^-4	2.31x10^-4	56898/35/54988/3155/18/3158/3033/1892/622/1962/6296/348158/123876/7915/38/3030/39/65985	18
hsa00640	Propanoate metabolism	19/2069	32/8160	4.53x10^-5	6.65x10^-4	5.59x10^-4	5095/35/18/1892/4329/1629/594/8310/1962/23417/32/8801/51/593/4594/3030/5096/84693/31	19
hsa00620	Pyruvate metabolism	24/2069	47/8160	1.32x10^-4	1.67x10^-3	1.40x10^-3	134526/5105/219/126/127/124/197257/130/3029/5106/223/32/9380/217/5315/10327/38/224/98/501/39/4200/5091/31	24
hsa01240	Biosynthesis of cofactors	59/2069	153/8160	1.92x10^-4	2.17x10^-3	1.82x10^-3	8564/169355/7364/54490/25902/4830/6470/4831/219/249/23498/6999/1723/2643/9104/53354/7365/29968/50808/4143/217/2058/4522/7360/10327/586/10720/80308/3242/158/145226/8942/10243/8630/790/133686/211/224/11019/493911/6472/210/51004/326625/7363/2677/159/554235/7367/54576/122622/205/54578/9249/27010/8836/93100/2729/29922	59
hsa00040	Pentose and glucuronate interconversions	17/2069	35/8160	2.52x10^-3	2.08x10^-2	1.75x10^-2	7364/54490/51084/7365/6652/7360/10327/10720/729920/231/51181/55277/7363/7367/54576/54578/27294	17
hsa00053	Ascorbate and aldarate metabolism	15/2069	30/8160	3.14x10^-3	2.52x10^-2	2.12x10^-2	7364/54490/219/9104/7365/223/217/10327/10720/224/501/7363/7367/54576/54578	15
hsa00500	Starch and sucrose metabolism	15/2069	36/8160	2.34x10^-2	1.55x10^-1	1.31x10^-1	57733/178/2998/5236/7360/5836/11181/57818/5837/5167/2992/6476/5834/283209/8908	15
hsa01210	2-Oxocarboxylic acid metabolism	9/2069	19/8160	3.12x10^-2	1.88x10^-1	1.58x10^-1	2806/51166/48/586/3418/84706/95/2805/2875	9
hsa00010	Glycolysis/gluconeogenesis	24/2069	67/8160	3.65x10^-2	2.06x10^-1	1.73x10^-1	2027/5105/2203/219/126/127/124/130/5236/5106/223/217/5315/10327/669/57818/130589/224/229/5230/2597/501/230/226	24
Bg ratio, background ratio.
Table SV. Expression profile of the differentially expressed genes involved in carbohydrate-associated pathways.
Gene	N12	N13	N17	N19	N22	N23	T12	T13	T17	T19	T22	T23
PGK1	12.289409600	12.218337160	12.912885000	13.069143330	12.420074170	12.878706670	13.948342870	13.783385850	12.947293330	13.909193330	12.710098330	13.407098120
BCAT1	6.939896667	6.090734223	5.772660333	4.396598911	3.286790833	6.858857958	7.960706000	8.679448282	7.970173417	8.372745829	7.359455917	6.587932917
AACS	8.160667771	8.578289226	7.543215399	7.621081301	8.312243928	8.667902010	9.258163421	9.058579218	8.356944132	8.570747072	8.310480040	8.866959402
ADSL	8.954651765	8.719084363	10.311688710	9.488118868	8.751768480	9.133147239	10.743840670	11.364410510	10.591601480	11.133916510	9.204144444	10.364925640
GFPT1	7.655807167	7.931698417	7.718900250	7.872126000	7.046764500	7.566697417	8.776104833	8.322819615	8.373822191	8.555186864	8.251471599	7.948333306
ASNS	8.915624383	7.961271057	6.766103583	6.899284103	7.277899188	8.692068917	11.069368330	9.967749417	10.803925700	10.317738330	7.312293000	9.514111513
CAD	7.633846167	7.634146667	6.361197417	6.261858417	6.619246729	6.710992307	8.682442854	9.457473808	7.569101083	8.534611000	7.194988941	7.820078379
ADSS	8.971319874	8.935810971	8.620712983	9.083815001	8.408422855	9.355576686	9.581004805	10.409001630	9.627454223	9.354759325	9.048831975	9.421317967
ASRGL1	7.709427062	8.388199083	7.610946667	8.010336833	8.241917250	8.229460833	9.879610500	8.966504000	8.309453750	9.371604333	8.360575417	8.011478833
GLS	9.989439577	9.384020167	8.927851772	9.196219417	9.576840083	10.205300500	11.913511670	10.064654490	10.971785000	10.542508750	11.435130430	8.825203500
SMOX	6.547166500	6.725949591	6.897057917	6.316114500	5.317636060	7.263568651	7.625821460	7.515786153	7.378630167	9.830146923	7.471549207	6.185202917
TKT	12.070615830	12.059000000	11.759552500	11.877975390	11.729567710	12.346126140	14.491667090	13.278456480	12.587302500	13.574015680	13.238201260	13.735846670
PKM2	8.258531167	7.595890667	7.758411250	7.599937250	8.002488917	8.089401167	9.749913608	9.142744333	8.914089667	9.585900073	8.671130000	7.992974417
PYCR1	8.711737851	9.324080833	9.098760667	8.284919000	8.702654667	8.969453750	11.620402720	11.698186430	11.364410510	12.067497030	8.379022984	10.007841580
ALDH18A1	10.391794120	10.636527650	9.456995606	9.978283963	9.867071170	9.654147161	12.014338780	11.126524770	10.824130290	11.097131300	11.183414970	10.140875310
PYCR2	10.840144170	10.602630000	10.427530420	10.614166140	10.759275960	10.869337500	11.912496670	11.531625990	10.890813330	11.585937160	11.366513790	11.050695830
GAPDH	12.431611410	12.873025000	13.270845830	13.180792500	13.290013780	12.674578330	13.640074980	13.802787500	12.986029000	14.501587500	14.053982500	13.510308330
MTR	10.438985500	10.106794920	8.915386000	9.883186707	9.561545972	9.896040934	10.564744380	11.167934350	10.387422540	10.245277830	10.088784670	10.709975830
RPIA	11.194969650	10.687726670	10.125866670	10.722071670	10.396248790	11.191021670	12.089056670	12.443342230	11.081261670	11.359004250	10.976322580	10.716133600
ME2	8.394343250	8.325056167	8.928303173	7.823305333	7.981456500	8.800543538	9.593936004	9.371393500	9.580156917	9.679670505	8.620097571	8.344626083
ACACA	4.684244087	4.262292575	5.238049513	4.490090757	4.872367361	3.833943756	4.755556129	5.013273636	5.402055306	4.996068851	5.276518040	5.622287770
MTHFD1L	6.169661250	6.529449406	6.024001074	5.812984833	5.240639333	5.913979750	8.210928677	8.414386689	7.600555709	8.241268617	8.358965917	7.127028074
NME1	13.791082500	13.660387280	13.957342250	13.913712930	13.723884270	13.818878330	15.103262500	15.167531670	15.401967500	15.241221420	15.078143820	14.627635830
NME2	15.411672500	15.303131180	15.512782500	15.523413520	15.326640830	15.553156330	16.833383850	16.488785630	16.809265000	16.937309100	16.517125060	16.315169170
EPRS	12.150711540	11.917663330	11.422276280	11.593041670	11.393480200	11.768432500	13.854736670	12.739292780	12.603745830	13.070407250	11.917663330	12.989501760
FLAD1	6.998548077	7.156980004	7.265032917	7.420354428	7.337899600	7.470716667	8.395360954	7.678010784	7.627945583	8.278565917	7.778574000	8.643383667
PHOSPHO2	7.468422090	6.901784750	9.106061333	7.903948000	7.968080333	8.178566747	8.854520750	9.740022874	8.534807500	8.888379250	8.309825500	9.357825705
GGH	12.122508330	11.956901860	13.442037500	12.654668330	12.489750830	11.956901860	12.518738330	13.514133330	14.095197810	14.485637500	12.277715560	16.131971670
NME7	9.313154122	8.600657719	10.315395860	9.525191000	9.055134000	9.256569000	11.527367500	11.065437110	10.159480670	10.058012250	8.621576167	10.830237500
AKR1B1	10.237737510	9.544638995	10.149362310	10.574397230	9.273838192	11.716556970	12.137962990	9.594628123	15.380491420	14.138350710	14.147619990	12.644283250
DHDH	6.048228731	6.040939245	5.906881691	5.649585000	5.317998917	6.883366599	8.712862365	6.254746114	7.539339667	7.612295167	5.687910519	6.281792750
GYG1	9.353437167	8.978742383	8.823932083	9.302350417	8.478465746	9.014772986	10.314760830	10.099683170	10.039069130	10.089233720	10.187810850	8.432073167
SI	0.103028333	0.177961250	1.027909096	0.147304583	-0.467925675	0.011786067	4.294360594	2.980916467	3.273203621	0.800840533	0.005980223	0.132998375
PYGB	8.665016167	8.779447072	7.648409167	8.089815583	8.334650629	8.182178768	9.068230500	8.399964189	9.153359452	9.527750061	11.198875040	8.605728158
PGM2L1	8.872787750	8.149388244	7.498778750	6.573176500	6.804745530	8.177960704	9.301311858	8.727754977	8.751520167	8.126557333	9.208076048	7.971174583
BPGM	9.887508167	9.725923885	10.139623510	9.991645500	9.745365167	9.951695926	10.696795000	9.935465583	11.278121560	10.628785000	11.807324480	10.572800750
ACAA2	14.287483200	15.006209280	14.947839800	14.221282850	14.692425980	14.744203980	11.413120150	11.973501010	12.141837350	12.714635510	12.369174750	13.674156960
PCCA	13.408902500	13.911294850	13.434703420	13.494535000	13.499591430	13.207083010	10.954969170	11.108382160	12.047671240	10.789380830	11.331087760	12.603218320
ACADS	9.141159742	9.367203428	10.824803240	10.396625240	10.126320230	8.995318113	5.883678071	6.092342191	6.275814410	8.131903310	6.516445562	7.874105842
HMGCL	12.242295680	11.975282330	12.808309710	12.891994170	12.727263330	12.301372500	9.308220417	9.591750083	9.891503083	10.925588330	9.796731917	11.521327440
ABAT	13.480003970	13.266270240	13.404418690	13.606414610	13.776764350	12.682115840	9.642930994	9.023075336	10.949301410	10.078805870	10.884491550	12.272952730
ACAA1	14.864347460	15.004101120	14.972126250	14.856110710	14.975404680	14.661967260	11.854175280	12.099205090	12.279283130	12.875373060	13.482231300	14.081664770
ALDH1B1	9.937534490	10.788826210	10.751117880	10.910932280	11.214759970	11.363492540	7.027212335	7.943318305	8.179679976	8.117670024	9.273337324	9.698281449
HMGCS2	13.745727880	14.170062500	14.555046670	14.380580650	13.901026470	13.483612500	9.402379750	10.836945260	12.305288070	11.388542690	12.353961670	12.242295680
HADH	12.398723330	12.879856000	13.797040000	13.882809360	13.399404170	12.932889820	10.294835820	11.535506830	11.666043530	10.975121670	11.263024260	12.333563550
ECHS1	15.596337160	16.523278330	16.694060830	16.498569070	16.413585700	16.352684520	14.061328330	14.260457500	14.796785240	15.331407500	15.346731670	15.285263930
ALDH6A1	14.231930020	14.269501030	14.028703290	13.948342870	14.104921710	13.613305850	9.802583993	10.811364690	11.384995770	10.345274160	9.708385646	13.950420980
DBT	9.220325083	8.846463655	9.457473808	9.317335307	9.407345833	8.675185083	7.686406634	7.276693831	7.633453241	7.090139585	6.604166083	8.834039917
AGXT2	11.749804570	11.771705430	12.191998470	12.440158390	12.458791250	11.489753940	5.769539852	8.865726012	9.598225451	10.040125170	8.624148315	10.521959370
BCKDHB	9.827621581	10.427530420	11.320319170	10.792158540	10.856632500	10.273709210	7.927987500	8.256763750	8.012850167	7.796569138	8.507823666	10.498882230
EHHADH	11.208310830	10.805310830	11.648830000	11.781073160	10.972342500	11.214052750	6.410929333	8.257637167	9.312201000	8.648014000	7.470716667	11.409347500
ALDH9A1	12.104820690	12.324960460	12.334497270	11.787720030	12.170651570	11.249100320	11.229383580	10.551962590	10.716738170	10.527951450	10.716133600	11.650844680
ACADM	12.812790250	12.997956160	13.768728190	13.156640160	12.812790250	12.532067260	11.386601900	11.110141310	11.749130800	11.331673190	10.522868270	13.060169800
ALDH2	16.685385380	16.793626500	16.736707170	16.685385380	16.746574730	16.259149250	15.416103600	12.976678310	14.823410760	14.175931630	15.507993950	16.295434910
IVD	7.973518333	8.505871400	9.621811167	9.117135833	8.725962692	8.010336833	4.457492833	6.153125750	7.356497917	6.935753052	7.272982333	7.859908459
ACADSB	12.094322980	11.524452360	12.649283310	12.969918760	12.548316430	11.249764410	8.316169551	10.890182220	9.874121352	10.386571220	9.611740612	11.929854260
ACAT1	15.096034940	15.533313220	16.336328060	15.779599160	15.721276530	15.229901790	12.658172050	12.919145910	14.697622940	14.274462850	14.520162170	15.229901790
ACAD8	8.720967359	8.821790821	8.950585749	8.954302597	8.829996575	8.784806073	8.122686879	7.824176272	8.248950942	7.764731068	8.462875703	8.556268607
BCKDHA	11.809760220	12.229235000	12.433825830	12.179341670	12.601601670	11.946477500	11.670245830	10.744553330	11.209723330	11.136272690	11.967302500	11.427682380
MUT	13.982751670	13.981057100	14.127095830	13.861452500	14.138350710	13.752790000	11.091157500	11.621205000	13.386704170	11.109471090	13.044241670	13.901026470
MCCC1	12.961107020	13.191859460	13.571564430	13.272498540	13.324625830	13.315163280	12.336943330	12.730006670	12.480057500	11.805123900	11.953404420	13.244617500
HADHA	10.344833750	10.474690710	10.391794120	10.350408580	9.838184065	9.685993679	9.237565334	9.614049500	9.367203428	9.850323319	8.865294440	9.562465750
ACSF3	8.637558046	9.171067597	8.322819615	8.834940252	8.235435559	8.708693281	7.216892295	7.933248106	7.563196086	8.006747366	6.874229075	8.537648539
ALDH3A2	11.034193520	10.715589650	11.372217110	11.115399530	10.792158540	11.008163940	9.191384380	8.570747072	9.195624129	9.818403061	10.446223990	11.301173290
PCCB	10.457410120	11.086870160	12.011894170	11.615798170	11.279797500	10.968680830	9.078920083	8.987752083	10.213766000	10.485242850	10.483777580	11.036322500
AUH	10.953384170	11.225726670	11.914750830	11.638900830	11.388542690	11.463245830	9.726397275	10.862844170	10.849989760	10.076526470	10.557207420	11.320319170
MCEE	12.024310000	11.749804570	12.741241200	12.185360830	12.266681650	11.497150000	10.862111670	11.060306230	10.815120830	10.847798750	10.545620000	12.439288330
ALDH7A1	12.788439200	13.098065290	12.812790250	13.411253030	13.194007780	12.827063080	10.930018640	11.269313290	12.032715960	12.074157480	11.956445600	13.493481900
ACAT2	13.169020990	13.061445330	12.817941320	13.060169800	12.720867580	12.621606420	11.472482680	12.111676740	11.709352970	11.888428970	13.306780380	12.109599560
HIBADH	13.000430120	12.713371670	13.264597500	13.424033700	12.990584170	13.171570950	10.613091500	11.107767500	11.782644170	11.254529170	12.364078460	13.851944170
AOX1	15.621394690	15.314630480	15.188371190	16.111219210	14.940683680	13.976558710	12.613754570	12.579184050	13.276212790	13.981057100	12.628642280	16.418977810
HSD17B10	12.898906670	13.127323330	13.491555000	13.506098330	13.413012500	12.776705650	11.828048550	12.307546520	11.945180260	12.402578330	12.320213050	13.720734170
HADHB	14.266775000	14.856110710	14.197629170	14.218671580	14.079810000	14.114348330	13.872486640	14.308383330	13.510308330	13.629737500	12.931893210	13.963166670
MCCC2	8.887129500	9.695024971	9.135722337	9.937174043	9.676824111	9.952284167	7.922225377	8.904178417	8.532931500	8.404426750	8.457294833	10.206506670
GOT2	12.943619530	12.876845830	12.523552950	12.389267030	12.405837700	12.204327280	10.146367680	10.834052960	10.833333330	10.191710470	10.582500500	11.066908330
GLS2	11.879411670	11.299608330	12.399553160	12.348023330	12.359456300	11.845901670	4.646387701	4.050166167	8.767443333	6.163525347	8.005996167	6.543615000
ASPA	8.963848250	9.470040707	10.144309750	9.677854824	9.217718583	8.746255830	5.720815000	8.027660750	7.584729000	5.941593833	6.315153833	6.708702392
NIT2	13.229520830	13.455956450	14.107919170	14.003396670	13.795005830	13.565859780	12.332612500	12.179341670	12.740280000	12.775040000	12.856810000	12.609125430
ASS1	12.301837920	11.736714170	12.588628330	13.458110080	12.814403330	11.587705000	5.839611646	9.196755583	9.028160500	9.812480877	9.831903403	10.775207150
ALDH5A1	11.395837800	11.338292770	11.196456300	11.710359090	11.559808680	10.846872740	8.615728685	8.533750544	10.206918110	9.613571578	9.776959394	11.526633430
FOLH1	11.366134170	10.219086820	11.952982720	11.673787320	11.676219800	9.010763442	7.190270017	8.629155081	10.383198250	8.140332658	8.492257667	9.826400167
GPT2	10.508627080	11.703111320	10.970060000	11.110374800	11.503435000	11.005470490	7.991728137	8.902530917	7.169626583	9.032556333	8.901549843	11.858195000
ALDH4A1	12.751822280	13.134123270	12.317348540	13.238201260	13.185719240	13.064263280	9.416989845	11.174292530	11.026284740	12.116064420	10.701561820	13.128961300
AGXT	10.755756920	11.238536040	11.909966790	11.471935950	11.660563500	10.931125570	4.694878218	9.807828355	9.495209139	6.586423808	9.413396284	10.677945780
ASL	11.090237500	11.996719150	12.512682500	12.665957500	12.332612500	11.927837500	8.665016167	8.922175000	10.512963330	11.995276350	11.575190000	10.719173510
GOT1	12.579184050	13.922780670	12.611085000	13.181998330	12.707413060	12.653046670	9.964052500	9.342310833	11.088398410	12.573798330	12.845187500	12.282207500
CPS1	13.898801380	13.923926010	13.946315830	14.586311670	13.926490830	13.768728190	7.528506833	13.928514170	10.298625080	11.743370000	7.692056764	14.731719170
GPT	10.831562500	11.971912810	11.733792280	12.620114150	12.683138050	12.083053370	7.983990429	11.970828950	9.364876917	10.387749920	11.345827030	11.208977590
ADSSL1	9.030142815	9.677854824	11.446359280	10.995982170	11.017840010	9.512718330	6.718197234	9.078657292	9.741515110	8.648693935	8.387003048	10.192858370
CNDP1	10.734749170	10.600119890	13.529635830	12.945416670	12.668184170	8.105328996	6.307097417	6.043393083	6.989953833	7.004619833	6.985074167	6.409084750
DPYD	9.951695926	9.584314500	10.255667500	10.131928280	9.967749417	9.648374112	8.377727000	9.305605667	9.121165750	8.362173667	7.691676417	8.340742833
ACOX3	8.737640750	9.266055679	8.908691188	8.871505012	9.097682889	8.690526554	8.046648602	7.815011457	7.922225377	7.159052612	8.446771332	7.747679743
DPYS	14.260457500	14.954510830	14.526078330	14.560651670	14.514578330	14.716710830	9.142744333	11.438681670	13.016705830	11.058189830	11.990605830	13.906720830
CSAD	9.230962650	9.061670648	8.859062000	9.218432750	8.530222417	7.704997538	5.750304583	5.606411251	6.736108155	6.774821327	8.667902010	7.144880333
MLYCD	10.164504330	10.503333140	11.415505000	11.082499170	10.624586720	11.164447710	8.744296003	9.233352510	8.813176667	8.578537417	7.583908942	10.931125570
CNDP2	10.118810510	10.388082310	10.341938960	10.166334750	10.211091670	10.094728830	10.073055500	9.165136500	9.219911500	9.675212928	9.317674417	9.352207167
ACOX1	11.676219800	11.760423130	11.612684140	11.678712120	11.546905970	11.459333770	9.309052270	9.503444980	10.323565610	10.314760830	10.396625240	11.985243670
UPB1	12.695955000	12.628642280	13.191859460	13.093274820	13.208523330	12.561840740	8.573154417	7.438302333	12.476093240	9.020181417	13.414450860	11.849531100
ENO3	10.628062500	13.641655720	14.201233170	13.627113330	14.434768960	13.363636670	8.227333500	10.169821170	9.301311858	9.013393000	9.337540317	9.841765250
SHMT1	11.167934350	11.449451370	12.038639170	11.634935000	11.441864910	10.662257500	7.423531167	7.656171369	8.373603417	8.097745237	9.289773417	9.984013667
SDS	10.682073610	13.485371670	12.957574170	12.374307420	12.510857840	12.484337500	6.627025250	7.654122250	8.398026235	9.171469658	9.498039833	10.300069670
PHGDH	11.109114170	10.815120830	11.955607730	11.420065800	11.721966810	10.541386830	6.554118621	8.455524500	8.381195167	8.545366667	10.430474920	7.563196086
CBS	14.464321670	14.667050000	14.779640000	14.784152500	14.818650000	14.139743810	10.635086090	11.656841670	12.408260000	12.922450830	11.835007580	14.016340000
PSAT1	12.407045000	12.230274700	13.042681450	13.120153640	12.969918760	12.075405000	9.502676500	11.473897500	11.331673190	10.625776830	11.950428330	10.664184640
ACO1	13.218696160	13.149582530	12.798371140	13.437023640	13.197863670	12.678063130	11.143756710	11.385790050	12.098237490	11.015166510	12.367007540	12.543182810
MAT1A	16.985042440	16.776284300	16.017765830	16.602190830	16.566785000	15.517980830	12.079180830	14.120867360	14.147619990	15.110045880	14.180920000	15.726677410
IDH2	10.138582330	11.334095370	11.773703330	11.112873790	10.989925830	10.840144170	8.954302597	8.571881250	9.712507750	11.034193520	9.897837500	9.225514907
PAH	14.455752890	14.910574170	14.551130000	15.146810830	14.988238330	15.049327500	8.809556500	12.957574170	11.642445000	12.670152910	10.888450830	15.203157500
ARG1	16.222036140	16.498569070	16.937309100	16.746574730	16.434905590	16.222036140	9.640005067	14.829526870	14.428340390	14.520162170	14.104921710	15.839000670
OTC	13.661868330	14.023910000	14.388036670	14.388036670	14.130512610	14.589346970	9.526614860	12.532067260	12.635072500	11.373293300	11.749804570	14.856110710
ALDOB	17.283391740	17.189527180	17.530112120	17.429469450	17.483762880	17.172072010	12.711944700	13.392305180	16.369572810	14.424812600	17.012093980	16.972379490
ACY1	12.103498990	12.929507630	13.202243570	13.183719080	13.437023640	12.782212480	9.405697341	10.127528790	11.822196450	12.055187100	12.043354670	12.613754570
SDSL	10.598647330	11.927837500	11.855639170	12.123452500	12.434534170	12.044384170	9.562078437	8.943437222	10.456400830	10.892806670	12.181217500	10.000554440
SHMT2	13.327518330	13.204942500	12.807140830	13.298225000	13.308548900	12.883526670	11.413621550	12.728620830	11.819229170	11.930945830	13.301694170	12.501074170
CTH	13.667792500	14.802359170	13.959963680	14.479461670	14.122050000	14.439508330	9.754133140	10.698096670	11.948234960	10.324681260	9.662109917	16.746574730
PC	13.207083010	13.672379760	12.186441670	13.367279180	13.501242500	12.644283250	9.452224500	11.637071670	11.293754170	10.615693370	13.210399170	13.112397500
ALDOC	8.184353893	9.157384250	9.585496463	8.475703967	9.342049713	8.719469838	6.670284495	8.265049015	9.088689781	7.545231473	8.082979838	7.843447976
ALDOA	13.376485320	14.355154910	13.879809500	13.714277520	14.751392610	14.313492060	12.839769160	12.029835940	12.672907840	12.937239250	14.491667090	13.622189040
HAO2	11.888428970	11.565376900	12.682115840	11.956445600	12.644283250	11.353071020	5.360334000	4.850710500	9.113238750	6.608685366	8.493342167	5.904192651
CAT	14.654142500	14.968326030	14.992747750	15.665416460	14.997115000	15.072200100	11.400361540	12.048670830	12.748154410	12.879856000	12.390999170	13.750928330
HOGA1	9.825459628	9.526614860	10.581997580	10.078805870	10.290538250	9.112742055	5.263243624	5.856199025	6.646199583	5.803272233	3.584151833	8.373603417
GRHPR	12.922450830	13.120153640	14.563192000	14.019767500	13.858380000	12.941852500	9.755530833	10.318488750	11.956445600	10.845058480	11.744454170	13.426957320
HAO1	13.402731060	13.787596020	14.731719170	14.645585830	14.206379170	14.269501030	9.287970837	10.072143330	12.223261540	12.383273930	10.630100720	14.182868330
AMT	10.612532130	10.484609390	11.280783640	10.903188790	11.100132740	10.277348480	8.072281847	9.430407668	9.539878431	9.899419083	8.916916291	10.472544500
GLYCTK	11.593041670	11.179726720	12.102111790	12.133800830	12.336943330	11.289842150	8.163280333	9.219001167	11.203581670	9.719822500	10.167366330	11.324140000
GLDC	12.301837920	13.054166210	12.763277190	13.119002560	12.954553330	12.508350000	8.987394922	12.190271090	11.555030840	11.194187500	11.994197500	9.532510729
GCSH	13.879809500	14.087482500	14.495685830	14.499251670	14.825947500	14.079810000	13.185719240	13.776764350	13.516598080	12.309672500	13.497940830	14.197629170
HYI	11.376312500	11.245580830	12.083053370	11.704033330	11.985243670	11.201067140	10.621119330	10.419146010	10.601587000	11.223053330	10.385427310	11.617530830
OGDHL	13.840937980	14.101645830	13.317289080	13.858380000	13.868217500	13.336280730	8.579882389	7.000672667	9.959579640	9.618463500	11.899069710	11.208310830
FBP1	15.193524170	16.125758410	14.910574170	15.009892500	15.277075000	15.212722250	10.914423330	10.432292130	13.568243330	12.221607540	13.413012500	12.765022500
IDNK	12.575615000	12.777801340	13.018853330	12.859542500	12.561840740	12.620114150	9.611237686	11.686009170	10.717182850	10.209303510	10.245597630	11.899069710
SDHA	11.962217910	12.330236000	12.564049170	12.256294170	12.128505830	12.119037500	9.973355604	10.070425110	10.735461390	10.983139170	11.400361540	11.555778510
RGN	16.066396960	15.809947680	15.801830830	15.054628330	15.699783530	15.096034940	12.321990190	14.444107500	14.138350710	12.959059170	13.689375830	14.674849550
DAK	8.450962870	9.009111417	9.891939803	9.884209347	9.476813878	8.124143167	6.301432500	5.960369417	7.768549750	8.603025250	7.098955917	6.750563294
SUCLG2	10.381952150	10.436395330	11.805967600	11.282491670	10.926370830	10.305248500	9.195825667	8.817542338	10.150590750	9.856350333	9.419818917	10.339936550
ESD	10.992307500	10.995982170	11.945180260	11.458450000	11.170136670	10.577937260	9.866019049	10.317738330	10.422738580	10.635086090	10.208188900	10.966888250
BDH2	13.132232500	13.474101550	13.418153330	13.439404170	13.507203330	13.745727880	11.170706670	10.344833750	12.258238330	11.160143400	11.466433550	10.968680830
ACSM5	11.626167030	11.196456300	11.669352900	12.060665980	11.270686450	11.489165270	6.596735182	6.407943878	8.134693093	8.142835998	7.140543459	10.528492750
BDH1	10.763605490	10.306659920	11.627165500	11.250166740	11.210368330	10.595332820	6.739308500	8.474514041	9.330179500	9.143098167	8.345374860	10.334992590
ACSM3	9.855815699	9.679392336	11.167934350	11.198875040	10.625776830	9.103927168	7.785752252	9.183954564	7.153504755	7.106825489	5.635359132	9.458426599
ACSM2B	15.652472960	15.826166820	16.488785630	16.474262010	16.066396960	15.523413520	10.073765340	13.062483390	14.001112910	13.499591430	13.350195010	15.542123280
ACSM2A	13.107388730	12.986029000	14.311375090	13.904950360	13.411253030	12.973690970	7.072259892	10.023138210	11.499468550	10.976322580	10.338253170	13.254858870
ACACB	6.949996348	7.894398630	8.046648602	7.035441160	8.034093129	5.791454769	4.608097233	4.535559334	6.398298561	4.764462776	6.627795563	4.995186221
ACOT12	11.902051660	12.553002900	11.842397230	11.780298530	11.811972180	11.995276350	7.456581180	9.038082053	9.494941898	9.548313040	9.358351991	10.059287630
PCK1	15.466083040	15.621394690	14.818650000	15.401967500	14.067545130	15.110045880	9.719322917	12.445502500	11.455544170	11.084090000	8.868323667	13.026656550
ADH1C	15.568652560	15.633437380	16.659890430	16.352684520	16.517125060	15.665416460	12.346126140	11.652233430	12.742718220	13.472104260	13.594176240	15.466083040
ADH4	16.024685500	15.979025980	17.147314260	16.917712130	17.033241410	16.369572810	10.290152070	14.239991050	12.421824020	14.257119270	11.863071950	14.872041500
ADH1A	15.770615910	15.875747740	17.113763050	16.589152100	16.671959530	16.346064520	11.491547720	14.428340390	13.574015680	14.474709550	13.138870760	15.106604600
LDHD	11.557179170	12.193851670	12.754918040	12.742718220	12.895150460	12.116064420	7.957022632	8.208359333	9.841060417	9.325948097	10.339004750	12.015115860
ADH6	10.736179820	10.364925640	12.143516860	12.031745040	11.673787320	10.483094880	5.996321716	9.614479791	8.344938763	9.057091497	7.045227025	10.068403400
HAGH	12.604917510	13.076896670	13.800297710	13.270845830	13.408902500	12.645445830	9.751295500	10.019776830	11.456507610	11.652233430	10.636527650	12.929507630
PCK2	15.475345000	15.735406210	15.561358540	15.960287500	16.389473330	15.893150000	11.623584170	11.942205790	14.321745000	13.061445330	13.627113330	15.758678330
AKR1A1	12.616484260	12.395450790	12.827869430	12.336943330	12.896644980	12.330236000	11.783542630	10.750689860	11.477931050	11.907194140	11.302764560	12.260540840
ACYP2	9.397892099	9.863941173	10.803140200	10.079837290	9.906737791	9.754992093	8.447929056	8.744296003	9.182815312	8.549305942	8.114434029	10.220912300
KMO	10.657785830	10.607824280	11.258101670	11.321325000	11.236390830	9.789124000	7.383231917	8.013078250	8.960153396	8.028912888	7.442029417	8.062283076
IDO2	9.717551171	9.991645500	10.548937610	11.515202750	11.240499530	9.597274917	7.233564833	3.223772583	5.937202167	5.664946500	3.137599679	6.130380667
UGT2B7	16.793626500	16.985042440	17.071018330	17.369974650	17.429469450	16.904734040	12.147489950	14.109675100	14.141579170	14.823410760	14.238265240	14.988238330
UGT2B28	13.804948330	13.501242500	14.833813330	14.294696670	14.599998330	13.882809360	8.843544081	10.191233100	11.476436670	11.467567610	10.517016670	11.880248330
ALPL	6.396783995	6.283292989	6.849521041	6.902127093	6.154728233	6.233050954	4.916092030	4.839050478	5.413187686	5.505932171	5.410993508	5.254471449
HAAO	10.314103080	9.933972667	11.197762500	10.784478330	10.679057500	9.724530368	7.334373667	7.920523583	8.486043750	8.283316667	8.780625417	9.657196167
TDO2	15.270820000	15.785611740	16.498569070	15.839000670	15.266183330	15.831213330	9.966510583	12.678839900	14.336365980	11.107767500	13.606414610	9.467939500
DHODH	11.851010830	13.171570950	11.873603700	12.996604170	12.330236000	10.785525830	9.186280333	9.615351333	10.207636170	10.703520810	10.700218330	9.935907000
GCH1	10.174352830	10.488750080	11.130849720	11.152251700	10.735461390	10.032125830	8.672411917	9.289773417	9.588654000	8.830963187	7.889874513	9.650613500
PANK1	10.445081670	9.616307083	11.288173360	11.421591740	10.126767160	10.520135750	6.907096480	8.346399737	7.977880500	8.700841417	6.294509196	9.773606833
UGT2B10	16.644134170	16.890013400	17.483762880	17.237363330	17.209380850	16.890013400	12.959059170	14.408374890	15.970527130	15.416103600	14.765550830	15.925766490
AK3	10.202135520	10.815790810	10.931488680	10.655350450	10.377871950	10.565234260	8.763657582	9.530365735	9.036141251	8.966822464	9.434897621	10.425965870
MTHFD1	13.165123330	13.872486640	13.671167500	14.092214430	13.933647500	13.595957500	10.894075500	10.795427850	10.968181670	11.668855000	10.848006670	14.400620830
UGP2	13.854736670	13.606414610	15.241221420	14.836946130	14.586311670	14.333501670	11.930945830	11.837257500	13.693970830	12.909959310	13.342613120	13.594176240
UGT2B11	15.331407500	15.665416460	16.864709570	16.434905590	16.306540830	15.839000670	11.776923390	13.590170070	15.626994170	14.747769170	13.429135830	14.960889690
HPD	11.941032500	12.611085000	13.127323330	13.491555000	13.123922570	12.426985830	5.945781917	5.573839750	6.490909917	10.059514950	8.496982302	14.242983330
RDH12	10.629531040	8.518578500	9.434427250	9.454443604	9.159260294	8.966504000	7.688676310	7.280147116	8.939580405	8.346621667	8.445700478	7.006760833
KYNU	12.558897500	12.497394170	12.929507630	13.203191990	12.694618330	11.963796670	10.698833700	11.885288370	12.040011670	12.297343840	11.347755830	10.501024000
GPHN	9.057653118	8.882199333	9.193192500	9.369286667	8.611908758	8.438358479	7.346339089	8.019455000	8.158495936	8.315101861	7.559015353	8.685665750
HSD17B6	15.501115000	15.686269170	16.626527500	16.168664170	16.053657580	15.380491420	10.408094640	11.943209900	14.540821060	14.881151670	12.588628330	15.557663380
NADK2	12.446377500	12.782212480	13.267505000	13.175849770	12.935029170	13.093274820	9.759356417	11.690028310	10.903501670	11.812815830	11.330370000	13.267505000
ALAS1	10.894075500	11.588328810	12.476093240	11.852996190	11.885288370	12.388331210	8.288229031	8.761024342	9.448951158	9.783341618	9.241141308	13.001960570
LIAS	9.194446000	9.079729333	9.373794500	9.069542000	9.145897917	9.261099000	8.510788185	8.296364485	8.717948583	7.929897917	9.179146417	8.647073210
ALAD	9.672330402	9.806686036	10.702830320	10.523593440	10.401069680	9.848232022	7.916376009	8.244917489	9.279299234	8.442804924	9.429785766	10.602078860
COQ6	8.857604667	9.380774385	10.492548750	9.822442750	9.491642417	9.230603833	8.467084667	8.557320333	8.839165083	9.125513083	8.279184553	9.243684250
MMAB	10.632310000	10.120979580	11.431855000	10.634420000	10.961904170	10.137499740	8.758043333	9.755942583	9.792771667	9.379069521	10.281549190	10.546053920
UGT2B4	14.107919170	14.972126250	15.981139170	15.248079170	14.902769110	15.033089170	10.272847330	12.285692500	15.419674170	13.671167500	11.924960980	14.683255000
GGCX	11.406703330	12.015115860	11.330370000	11.935372500	11.773703330	12.217696400	10.409001630	10.830237500	10.880660830	11.309056670	11.477931050	11.638900830
ASPDH	6.020023583	6.571531917	7.241050917	6.487380750	7.434518250	7.100157333	5.198048487	5.464219083	5.272606667	4.503731000	6.733590667	6.929892811
UGT2B17	13.772371670	13.892475750	14.856110710	15.014995000	14.731719170	14.147619990	10.226955340	10.151767170	14.460725830	13.374157550	13.041347750	13.818878330
UGT1A8	8.531371784	8.648874794	10.775207150	10.005406670	9.284513686	9.215600500	8.565453167	5.785714899	8.675681583	5.534951609	7.614086232	9.686581004
AK3L1	14.728277280	14.679018360	13.541103460	13.973583790	14.720860210	13.922780670	12.864753450	13.885872020	13.764842010	13.482231300	13.911294850	13.488807600
UGT1A6	14.400620830	15.397553910	14.614287500	15.501115000	15.027708330	15.376494170	12.713371670	11.318455830	13.125547500	13.326022900	14.417119130	16.060227690
DHRS3	13.714277520	13.837695830	12.922450830	13.808483920	13.617142500	13.380297500	11.902922500	12.059893330	12.249670930	13.217086270	13.439404170	13.482231300
TPK1	9.355188261	9.783994333	9.634905500	9.192506456	9.558505333	9.446808250	8.611908758	9.156428338	9.130571833	8.250072583	9.630409365	8.459789250
NAPRT1	13.117757500	13.683212500	13.693970830	13.885872020	13.963166670	12.947293330	11.960817500	12.312732500	12.523552950	13.961530830	13.033139170	12.748154410
GCLC	10.089233720	10.421763300	10.812286670	11.144767750	10.723990000	10.704615830	9.225948948	9.505109333	10.047517050	9.173074583	9.513652167	11.350030830
CRYL1	14.489308080	14.405463330	14.814430000	14.735289170	14.623027500	14.599998330	11.340801670	11.713410000	13.027954170	12.624732980	13.061445330	13.999001500
SORD	14.495685830	14.540821060	14.928061490	14.434768960	14.770141670	14.294696670	11.633502500	11.883736090	13.008695830	12.700385830	12.516520830	15.009892500
CRPPA	4.503731000	4.337841333	6.068097333	4.204496750	4.463789417	5.149734833	4.098479361	3.847818499	3.865016000	2.335872750	2.327453500	3.343172850
DCXR	14.077385900	14.597825000	15.025112500	15.436265970	15.385895830	14.238265240	9.539878431	10.087433350	11.674537500	12.202992500	12.094322980	15.907464700
FGGY	13.054166210	11.831549170	12.289409600	12.174985770	12.030852190	13.048037860	11.245580830	9.596668083	11.693052500	11.664959710	10.949740000	11.629042710
GBA3	13.175849770	13.783385850	14.812475000	13.923926010	13.861452500	12.688900000	7.743737064	8.150153309	12.544230000	8.818230051	8.991040083	6.039859167
AGL	11.733792280	11.440949100	12.310472160	12.245158380	12.220024880	11.290937060	10.168565300	9.723456753	10.948746300	9.313594792	9.736212784	10.636527650
GYS2	8.775744250	8.564567025	10.531579010	9.622572667	8.769854583	7.990497614	2.873191750	2.799941179	6.950348000	5.193057833	4.310502006	8.196878917
PGM1	13.122629170	12.976678310	13.911294850	13.493481900	13.586850780	12.755780830	11.401937400	12.098237490	11.596395830	11.338928330	10.647301920	13.113822500
PYGL	13.306780380	13.497940830	12.923826210	13.303343330	13.382825830	13.049575830	10.528492750	13.187541500	12.665957500	11.975282330	11.564635830	12.011894170
TREH	7.196363833	7.620890085	9.050748093	8.999312667	9.223190195	8.637752417	5.041045558	6.443016772	6.295629839	7.014529030	7.824488441	8.015783364
G6PC2	5.989233417	6.647901017	7.080835667	7.879777667	6.565200608	5.791934083	5.061239908	5.518169125	6.200577417	5.878623250	5.377510250	5.198473151
PYGM	7.146152417	7.646794167	7.926593750	7.983990429	8.318654917	7.361309083	6.277719500	6.189363583	6.876731405	6.702983750	7.854081333	7.152037403
ENPP1	11.972787500	11.811972180	12.201224170	12.129515000	12.458203330	11.297588330	8.530462952	11.068718330	10.581206830	10.469480630	11.840375000	11.458450000
GYG2	7.349989161	7.725352750	8.050269815	7.689821417	7.549003083	7.334373667	5.708429196	7.955867750	7.487720761	6.837872209	6.128580667	6.834650167
AADAT	11.269313290	11.600547890	12.241519240	12.173990580	11.886447420	11.511562530	7.756861604	8.307112493	9.000490560	7.937953976	6.417326364	9.510976769
GALM	10.345714100	9.912487442	10.331843510	10.149863080	10.481861120	10.479005690	8.834940252	9.664661638	8.897260417	10.413938830	9.383562700	9.370293621
Data were log2-transformed and standardized.
Table SVI. Biological process, cellular component and molecular function terms of carbohydrate-associated differentially expressed genes in Gene Ontology annotation analysis.
GO term	ID	Description	Gene ratio	Bg ratio	P-value	Adjusted P-value	q-value	Gene symbol	Gene count
BP	GO:0044282	small molecule catabolic process	105/208	452/18866	6.13x10^-116	1.07x10^-112	7.94x10^-113	ACAA2/PCCA/ACADS/HMGCL/ABAT/ACAA1/ALDH1B1/HADH/ECHS1/ALDH6A1/DBT/AGXT2/BCKDHB/EHHADH/ACADM/ALDH2/IVD/ACADSB/BCAT1/ACAT1/ACAD8/BCKDHA/MMUT/MCCC1/HADHA/ACSF3/ALDH3A2/PCCB/AUH/MCEE/ALDH7A1/ACAT2/HIBADH/HSD17B10/HADHB/MCCC2/GOT2/GLS2/ASPA/ALDH5A1/GPT2/ALDH4A1/AGXT/GOT1/GPT/ASRGL1/GLS/DPYD/ACOX3/DPYS/CSAD/MLYCD/ACOX1/UPB1/ENO3/SHMT1/SDS/CBS/MAT1A/PKM/PAH/ARG1/OTC/ALDOB/SDSL/PGK1/GAPDH/SHMT2/CTH/ALDOC/…	105
BP	GO:0016054	organic acid catabolic process	82/208	282/18866	2.80x10^-97	1.63x10^-94	1.21x10^-94	ACAA2/PCCA/ACADS/HMGCL/ABAT/ACAA1/HADH/ECHS1/ALDH6A1/DBT/AGXT2/BCKDHB/EHHADH/ACADM/IVD/ACADSB/BCAT1/ACAT1/ACAD8/BCKDHA/MMUT/MCCC1/HADHA/ACSF3/ALDH3A2/PCCB/AUH/MCEE/ALDH7A1/ACAT2/HIBADH/HSD17B10/HADHB/MCCC2/GOT2/GLS2/ASPA/ALDH5A1/GPT2/ALDH4A1/AGXT/GOT1/GPT/ASRGL1/GLS/ACOX3/CSAD/MLYCD/ACOX1/SHMT1/SDS/CBS/MAT1A/PAH/ARG1/OTC/SDSL/SHMT2/CTH/HAO2/HOGA1/HAO1/AMT/GLDC/GCSH/IDNK/BDH2/ACACB/PCK1/LDHD/PCK2/…	82
BP	GO:0046395	carboxylic acid catabolic process	82/208	282/18866	2.80x10^-97	1.63x10^-94	1.21x10^-94	ACAA2/PCCA/ACADS/HMGCL/ABAT/ACAA1/HADH/ECHS1/ALDH6A1/DBT/AGXT2/BCKDHB/EHHADH/ACADM/IVD/ACADSB/BCAT1/ACAT1/ACAD8/BCKDHA/MMUT/MCCC1/HADHA/ACSF3/ALDH3A2/PCCB/AUH/MCEE/ALDH7A1/ACAT2/HIBADH/HSD17B10/HADHB/MCCC2/GOT2/GLS2/ASPA/ALDH5A1/GPT2/ALDH4A1/AGXT/GOT1/GPT/ASRGL1/GLS/ACOX3/CSAD/MLYCD/ACOX1/SHMT1/SDS/CBS/MAT1A/PAH/ARG1/OTC/SDSL/SHMT2/CTH/HAO2/HOGA1/HAO1/AMT/GLDC/GCSH/IDNK/BDH2/ACACB/PCK1/LDHD/PCK2/…	82
BP	GO:0016053	organic acid biosynthetic process	54/208	368/18866	2.21x10^-45	4.82x10^-43	3.58x10^-43	ABAT/AGXT2/BCAT1/ACSF3/GOT2/GLS2/ASPA/ASS1/FOLH1/GPT2/ASNS/AGXT/CAD/ASL/GOT1/CPS1/GPT/GLS/DPYD/CSAD/MLYCD/UPB1/SHMT1/SDS/PHGDH/CBS/PSAT1/PKM/PYCR1/PAH/ALDH18A1/PYCR2/OTC/SDSL/SHMT2/CTH/MTR/HOGA1/RGN/ACSM5/ACSM3/ACSM2B/ACSM2A/ACACB/ACACA/AKR1A1/KMO/MTHFD1L/HAAO/GCH1/MTHFD1/UGP2/KYNU/LIAS	54
BP	GO:0005996	monosaccharide metabolic process	43/208	296/18866	9.01x10^-36	1.21x10^-33	8.97x10^-34	GOT2/GOT1/GPT/MLYCD/ENO3/SDS/TKT/PKM/ALDOB/PGK1/GAPDH/PC/ALDOC/ALDOA/RPIA/GLYCTK/FBP1/RGN/TKFC/ACACB/PCK1/PCK2/AKR1A1/UGT2B7/UGT2B28/UGT2B11/UGT2B4/UGT2B17/UGT1A8/UGT1A6/GCLC/CRYL1/SORD/AKR1B1/DCXR/FGGY/DHDH/PGM1/G6PC2/ENPP1/PGM2L1/BPGM/GALM	43
BP	GO:0043648	dicarboxylic acid metabolic process	30/208	97/18866	1.14x10^-35	1.42x10^-33	1.05x10^-33	ACSF3/GOT2/GLS2/ASPA/NIT2/ASS1/ALDH5A1/GPT2/ALDH4A1/GOT1/ADSS2/ADSS1/GLS/SHMT1/IDH2/ALDH18A1/SHMT2/HOGA1/GRHPR/SDHA/SUCLG2/ME2/PCK1/KMO/MTHFD1L/HAAO/MTHFD1/KYNU/GCLC/AADAT	30
BP	GO:0019693	ribose phosphate metabolic process	45/208	427/18866	3.31x10^-31	3.85x10^-29	2.86x10^-29	HMGCL/HMGCS2/ACAT1/ACSF3/MCEE/MCCC2/ADSL/CAD/ADSS2/ADSS1/MLYCD/ENO3/TKT/PKM/ALDOB/PGK1/GAPDH/ALDOC/ALDOA/RPIA/OGDHL/FBP1/SUCLG2/ACSM5/ACSM3/ACSM2B/ACSM2A/ACACB/ACACA/ACOT12/NME1/NME2/TDO2/DHODH/PANK1/AK3/KYNU/AK4/NME7/PGM1/PYGL/ENPP1/PGM2L1/AADAT/BPGM	45
BP	GO:0072521	purine-containing compound metabolic process	45/208	472/18866	2.58x10^-29	2.81x10^-27	2.09x10^-27	HMGCL/HMGCS2/ACAT1/ACSF3/MCEE/AOX1/MCCC2/ADSL/ADSS2/ADSS1/DPYD/MLYCD/ENO3/SHMT1/PKM/ALDOB/PGK1/GAPDH/SHMT2/ALDOC/ALDOA/OGDHL/FBP1/SUCLG2/ACSM5/ACSM3/ACSM2B/ACSM2A/ACACB/ACACA/ACOT12/NME1/NME2/TDO2/PANK1/AK3/MTHFD1/KYNU/AK4/NME7/PGM1/ENPP1/PGM2L1/AADAT/BPGM	45
BP	GO:0006631	fatty acid metabolic process	41/208	396/18866	4.15x10^-28	3.46x10^-26	2.57x10^-26	ACAA2/PCCA/ACADS/ACAA1/HADH/ECHS1/EHHADH/ACADM/IVD/ACADSB/ACAT1/MMUT/HADHA/ACSF3/ALDH3A2/PCCB/AUH/MCEE/ACAT2/HADHB/AACS/ACOX3/MLYCD/ACOX1/HAO2/HAO1/RGN/BDH2/ACSM5/ACSM3/ACSM2B/ACSM2A/ACACB/ACACA/ACOT12/PCK1/ADH4/PCK2/LIAS/UGT1A8/CRYL1	41
BP	GO:0006790	sulfur compound metabolic process	40/208	371/18866	4.17x10^-28	3.46x10^-26	2.57x10^-26	PCCA/HMGCL/HMGCS2/ACAT1/MMUT/MCCC1/ACSF3/PCCB/MCEE/MCCC2/AGXT/CPS1/CSAD/MLYCD/CNDP2/PHGDH/CBS/MAT1A/CTH/PC/MTR/SUCLG2/ESD/ACSM5/ACSM3/ACSM2B/ACSM2A/ACACB/ACACA/ACOT12/HAGH/AKR1A1/TDO2/MTHFD1/KYNU/LIAS/TPK1/GCLC/ENPP1/AADAT	40
BP	GO:0006081	cellular aldehyde metabolic process	19/208	63/18866	1.11x10^-22	7.44x10^-21	5.53x10^-21	AGXT2/ALDH9A1/ALDH3A2/ALDH7A1/GOT2/ALDH4A1/AGXT/TKT/IDH2/ALDOB/HOGA1/GRHPR/GLYCTK/HYI/TKFC/ESD/ADH4/HAGH/AKR1A1	19
BP	GO:0016051	carbohydrate biosynthetic process	28/208	213/18866	3.36x10^-22	2.09x10^-20	1.55x10^-20	GOT2/GOT1/GPT/ENO3/SDS/TKT/ALDOB/PGK1/GAPDH/PC/ALDOC/ALDOA/FBP1/RGN/PCK1/PCK2/AKR1A1/UGP2/SORD/AKR1B1/AGL/GYS2/PGM1/G6PC2/ENPP1/GYG1/PGM2L1/GYG2	28
BP	GO:0044242	cellular lipid catabolic process	29/208	236/18866	4.03x10^-22	2.34x10^-20	1.74x10^-20	ACAA2/PCCA/ACADS/ACAA1/HADH/ECHS1/EHHADH/ACADM/IVD/ACAT1/MMUT/HADHA/ALDH3A2/PCCB/AUH/MCEE/ACAT2/HADHB/CPS1/ACOX3/MLYCD/ACOX1/HAO2/HAO1/BDH2/ACACB/PCK1/PCK2/GBA3	29
BP	GO:0016052	carbohydrate catabolic process	27/208	200/18866	9.49x10^-22	5.33x10^-20	3.96x10^-20	ENO3/PKM/ALDOB/PGK1/GAPDH/ALDOC/ALDOA/GLYCTK/OGDHL/FBP1/IDNK/TKFC/AKR1A1/CRYL1/SORD/DCXR/DHDH/GBA3/AGL/PGM1/PYGL/TREH/PYGM/PYGB/PGM2L1/BPGM/GALM	27
BP	GO:0006767	water-soluble vitamin metabolic process	20/208	85/18866	2.09x10^-21	1.04x10^-19	7.73x10^-20	PCCA/MMUT/MCCC1/PCCB/AOX1/MCCC2/SHMT1/PSAT1/SHMT2/PC/MTR/RGN/AKR1A1/MTHFD1L/MTHFD1/FLAD1/MMAB/TPK1/GCLC/ENPP1	20
BP	GO:0009165	nucleotide biosynthetic process	29/208	266/18866	1.21x10^-20	5.39x10^-19	4.01x10^-19	ACAT1/ACSF3/ADSL/CAD/ADSS2/ADSS1/MLYCD/SHMT1/PKM/IDH2/ALDOA/ACACB/ACACA/KMO/IDO2/NME1/NME2/HAAO/DHODH/PANK1/AK3/MTHFD1/FLAD1/KYNU/NADK2/ASPDH/AK4/NAPRT/NME7	29
BP	GO:0006090	pyruvate metabolic process	20/208	152/18866	3.78x10^-16	1.27x10^-14	9.40x10^-15	AGXT/ENO3/SDS/PKM/ALDOB/PGK1/GAPDH/PC/ALDOC/ALDOA/HOGA1/OGDHL/FBP1/ME2/PCK1/HAGH/PCK2/PGM1/PGM2L1/BPGM	20
BP	GO:0006066	alcohol metabolic process	25/208	385/18866	1.09x10^-12	3.01x10^-11	2.24x10^-11	ACAA2/ALDH1B1/HMGCS2/ALDH2/ALDH3A2/ACAT2/GOT1/IDH2/CAT/HAO1/TKFC/ACACB/ACACA/PCK1/ADH1C/ADH4/ADH1A/ADH6/PCK2/AKR1A1/GCH1/RDH12/DHRS3/SORD/AKR1B1	25
BP	GO:0051289	protein homotetramerization	12/208	59/18866	1.67x10^-12	4.21x10^-11	3.13x10^-11	ALDH9A1/HSD17B10/GLS/UPB1/SHMT1/MAT1A/SHMT2/CTH/ALDOA/ACACB/ACACA/TDO2	12
BP	GO:0046939	nucleotide phosphorylation	16/208	135/18866	1.94x10^-12	4.77x10^-11	3.54x10^-11	ENO3/PKM/ALDOB/PGK1/GAPDH/ALDOC/ALDOA/OGDHL/FBP1/NME1/NME2/AK4/NME7/PGM1/PGM2L1/BPGM	16
BP	GO:0015980	energy derivation by oxidation of organic compounds	21/208	278/18866	4.52x10^-12	1.04x10^-10	7.70x10^-11	ADSL/GFPT1/ACO1/IDH2/SHMT2/CAT/OGDHL/SDHA/SUCLG2/ME2/UGP2/AGL/GYS2/PGM1/PYGL/PYGM/ENPP1/GYG1/PYGB/PGM2L1/GYG2	21
BP	GO:0019674	NAD metabolic process	11/208	50/18866	5.76x10^-12	1.30x10^-10	9.68x10^-11	ENO3/PKM/ALDOB/PGK1/GAPDH/ALDOC/ALDOA/KMO/NADK2/PGM2L1/BPGM	11
BP	GO:0006735	NADH regeneration	9/208	27/18866	7.99x10^-12	1.74x10^-10	1.29x10^-10	ENO3/PKM/ALDOB/PGK1/GAPDH/ALDOC/ALDOA/PGM2L1/BPGM	9
BP	GO:0061621	canonical glycolysis	9/208	27/18866	7.99x10^-12	1.74x10^-10	1.29x10^-10	ENO3/PKM/ALDOB/PGK1/GAPDH/ALDOC/ALDOA/PGM2L1/BPGM	9
BP	GO:0046185	aldehyde catabolic process	7/208	12/18866	1.35x10^-11	2.72x10^-10	2.02x10^-10	AGXT2/AGXT/HOGA1/ESD/ADH4/HAGH/AKR1A1	7
BP	GO:0042402	cellular biogenic amine catabolic process	8/208	21/18866	3.43x10^-11	6.64x10^-10	4.94x10^-10	ALDH7A1/SMOX/KMO/IDO2/HAAO/TDO2/KYNU/AADAT	8
BP	GO:0006575	cellular modified amino acid metabolic process	17/208	190/18866	3.76x10^-11	7.21x10^-10	5.36x10^-10	ALDH9A1/ACADM/ALDH7A1/GOT2/ASS1/FOLH1/ALDH4A1/CNDP2/SHMT1/SHMT2/HOGA1/HAGH/MTHFD1L/GCH1/MTHFD1/GGH/GCLC	17
BP	GO:0031667	response to nutrient levels	25/208	473/18866	9.42x10^-11	1.70x10^-9	1.26x10^-9	HMGCL/BCKDHB/ACAT1/AACS/ASS1/ADSL/ASNS/CAD/CPS1/GPT/ADSS1/PKM/ARG1/OTC/CAT/ACACB/PCK1/PCK2/ALPL/DHODH/KYNU/ALAD/GCLC/SORD/AGL	25
BP	GO:0042398	cellular modified amino acid biosynthetic process	10/208	49/18866	1.21x10^-10	2.10x10^-9	1.56x10^-9	ALDH9A1/ACADM/ALDH7A1/CNDP2/SHMT1/HAGH/MTHFD1L/GCH1/MTHFD1/GCLC	10
BP	GO:0042537	benzene-containing compound metabolic process	8/208	25/18866	1.76x10^-10	2.97x10^-9	2.21x10^-9	ACAA1/GOT2/KMO/IDO2/HAAO/TDO2/KYNU/AADAT	8
BP	GO:0042436	indole-containing compound catabolic process	6/208	10/18866	3.38x10^-10	5.31x10^-9	3.95x10^-9	KMO/IDO2/HAAO/TDO2/KYNU/AADAT	6
BP	GO:0005977	glycogen metabolic process	11/208	73/18866	4.40x10^-10	6.81x10^-9	5.06x10^-9	UGP2/AGL/GYS2/PGM1/PYGL/PYGM/ENPP1/GYG1/PYGB/PGM2L1/GYG2	11
BP	GO:0044042	glucan metabolic process	11/208	74/18866	5.11x10^-10	7.65x10^-9	5.69x10^-9	UGP2/AGL/GYS2/PGM1/PYGL/PYGM/ENPP1/GYG1/PYGB/PGM2L1/GYG2	11
BP	GO:0006734	NADH metabolic process	9/208	41/18866	5.22x10^-10	7.71x10^-9	5.73x10^-9	ENO3/PKM/ALDOB/PGK1/GAPDH/ALDOC/ALDOA/PGM2L1/BPGM	9
BP	GO:0001889	liver development	14/208	141/18866	5.34x10^-10	7.82x10^-9	5.81x10^-9	HMGCL/ACAT1/AACS/ASS1/ASNS/CAD/CPS1/PKM/ARG1/OTC/RGN/PCK1/PCK2/AK4	14
BP	GO:0046950	cellular ketone body metabolic process	6/208	11/18866	7.37x10^-10	1.05x10^-8	7.83x10^-9	HMGCL/HMGCS2/ACAT1/AACS/BDH2/BDH1	6
BP	GO:0006069	ethanol oxidation	6/208	12/18866	1.46x10^-9	2.02x10^-8	1.50x10^-8	ALDH1B1/ALDH2/ADH1C/ADH4/ADH1A/ADH6	6
BP	GO:1902224	ketone body metabolic process	6/208	12/18866	1.46x10^-9	2.02x10^-8	1.50x10^-8	HMGCL/HMGCS2/ACAT1/AACS/BDH2/BDH1	6
BP	GO:1901657	glycosyl compound metabolic process	13/208	129/18866	1.87x10^-9	2.53x10^-8	1.88x10^-8	CAD/DPYD/DPYS/UPB1/AKR1A1/NME1/NME2/DHODH/AK3/AK4/NME7/AKR1B1/GBA3	13
BP	GO:0042493	response to drug	21/208	397/18866	3.25x10^-9	4.28x10^-8	3.18x10^-8	ABAT/HADH/HADHA/AACS/ASS1/CAD/CPS1/ADSS1/ENO3/ARG1/OTC/CAT/FBP1/ACACB/NME1/TDO2/DHODH/ALAD/AK4/GGH/SORD	21
BP	GO:0006625	protein targeting to peroxisome	10/208	68/18866	3.56x10^-9	4.53x10^-8	3.37x10^-8	HMGCL/ACAA1/EHHADH/AGXT/ACOX3/MLYCD/ACOX1/HAO2/CAT/HAO1	10
BP	GO:0072662	protein localization to peroxisome	10/208	68/18866	3.56x10^-9	4.53x10^-8	3.37x10^-8	HMGCL/ACAA1/EHHADH/AGXT/ACOX3/MLYCD/ACOX1/HAO2/CAT/HAO1	10
BP	GO:0072663	establishment of protein localization to peroxisome	10/208	68/18866	3.56x10^-9	4.53x10^-8	3.37x10^-8	HMGCL/ACAA1/EHHADH/AGXT/ACOX3/MLYCD/ACOX1/HAO2/CAT/HAO1	10
BP	GO:0043574	peroxisomal transport	10/208	72/18866	6.32x10^-9	7.87x10^-8	5.85x10^-8	HMGCL/ACAA1/EHHADH/AGXT/ACOX3/MLYCD/ACOX1/HAO2/CAT/HAO1	10
BP	GO:0006760	folic acid-containing compound metabolic process	7/208	28/18866	1.74x10^-8	2.08x10^-7	1.54x10^-7	FOLH1/SHMT1/SHMT2/MTHFD1L/GCH1/MTHFD1/GGH	7
BP	GO:0007031	peroxisome organization	10/208	83/18866	2.58x10^-8	3.04x10^-7	2.26x10^-7	HMGCL/ACAA1/EHHADH/AGXT/ACOX3/MLYCD/ACOX1/HAO2/CAT/HAO1	10
BP	GO:0110096	cellular response to aldehyde	5/208	10/18866	3.74x10^-8	4.32x10^-7	3.21x10^-7	ESD/ADH4/AKR1A1/RDH12/AKR1B1	5
BP	GO:0070542	response to fatty acid	10/208	90/18866	5.68x10^-8	6.46x10^-7	4.80x10^-7	HMGCL/AACS/ASS1/CPS1/CAT/GLDC/ACACA/NME1/NME2/ALAD	10
BP	GO:0000050	urea cycle	5/208	11/18866	6.80x10^-8	7.64x10^-7	5.68x10^-7	ASS1/ASL/CPS1/ARG1/OTC	5
BP	GO:0071941	nitrogen cycle metabolic process	5/208	13/18866	1.86x10^-7	1.99x10^-6	1.48x10^-6	ASS1/ASL/CPS1/ARG1/OTC	5
BP	GO:0042180	cellular ketone metabolic process	15/208	260/18866	2.07x10^-7	2.15x10^-6	1.59x10^-6	GOT2/MLYCD/RGN/ACACB/ADH4/HAGH/AKR1A1/KMO/IDO2/TDO2/KYNU/COQ6/UGT1A8/AKR1B1/AADAT	15
BP	GO:0034754	cellular hormone metabolic process	11/208	134/18866	2.83x10^-7	2.88x10^-6	2.14x10^-6	ADH1C/ADH4/ADH1A/ADH6/UGT2B7/UGT2B11/RDH12/HSD17B6/UGT1A8/DHRS3/AKR1B1	11
BP	GO:0046034	ATP metabolic process	16/208	311/18866	3.81x10^-7	3.83x10^-6	2.85x10^-6	ENO3/PKM/ALDOB/PGK1/GAPDH/SHMT2/ALDOC/ALDOA/OGDHL/FBP1/SDHA/AK4/PGM1/ENPP1/PGM2L1/BPGM	16
BP	GO:0043434	response to peptide hormone	19/208	447/18866	5.69x10^-7	5.57x10^-6	4.14x10^-6	HADH/HADHA/GOT2/ASS1/CAD/GOT1/CPS1/GPT/PKM/ARG1/OTC/CAT/PCK1/PCK2/NME2/EPRS1/GGH/GCLC/ENPP1	19
BP	GO:0051384	response to glucocorticoid	11/208	147/18866	7.18x10^-7	6.76x10^-6	5.02x10^-6	ASS1/AGXT/CAD/GOT1/CPS1/ARG1/PCK1/PCK2/ALPL/ALAD/AGL	11
BP	GO:0042572	retinol metabolic process	7/208	47/18866	7.74x10^-7	7.25x10^-6	5.39x10^-6	ADH1C/ADH4/ADH1A/ADH6/RDH12/DHRS3/AKR1B1	7
BP	GO:0014823	response to activity	8/208	71/18866	1.12x10^-6	1.03x10^-5	7.67x10^-6	HADH/GOT2/ADSL/ADSS1/CAT/PCK1/ALAD/GCLC	8
BP	GO:0010043	response to zinc ion	7/208	54/18866	2.04x10^-6	1.81x10^-5	1.34x10^-5	ASS1/CPS1/ARG1/OTC/HAAO/ALAD/GGH	7
BP	GO:0006739	NADP metabolic process	6/208	35/18866	2.08x10^-6	1.83x10^-5	1.36x10^-5	TKT/IDH2/RPIA/ME2/NADK2/DCXR	6
BP	GO:0008202	steroid metabolic process	15/208	332/18866	4.42x10^-6	3.63x10^-5	2.70x10^-5	ACAA2/ACAA1/HMGCS2/ACAT1/ACAT2/CAT/ACACB/ACACA/UGT2B7/UGT2B28/UGT2B11/HSD17B6/UGT2B17/UGT1A8/AKR1B1	15
BP	GO:0014075	response to amine	6/208	47/18866	1.23x10^-5	9.70x10^-5	7.21x10^-5	ASS1/CAD/CPS1/ARG1/GLDC/NME1	6
BP	GO:0046165	alcohol biosynthetic process	10/208	164/18866	1.44x10^-5	1.11x10^-4	8.26x10^-5	ACAA2/HMGCS2/ACAT2/GOT1/ACACB/ACACA/PCK1/PCK2/GCH1/AKR1B1	10
BP	GO:0001101	response to acid chemical	9/208	132/18866	1.59x10^-5	1.22x10^-4	9.09x10^-5	ASS1/ASNS/CPS1/ARG1/PCK1/DHODH/ALAD/GCLC/AKR1B1	9
BP	GO:1901570	fatty acid derivative biosynthetic process	8/208	103/18866	1.85x10^-5	1.40x10^-4	1.04x10^-4	HMGCL/HMGCS2/ACAT1/ACSF3/AACS/BDH2/BDH1/ACACA	8
BP	GO:1901616	organic hydroxy compound catabolic process	7/208	76/18866	2.06x10^-5	1.55x10^-4	1.15x10^-4	ALDH1B1/ALDH2/HAO1/TKFC/ADH4/LDHD/SORD	7
BP	GO:0009636	response to toxic substance	12/208	250/18866	2.26x10^-5	1.69x10^-4	1.26x10^-4	ASS1/ASNS/CPS1/ARG1/CAT/RGN/ESD/ADH4/AKR1A1/GCH1/RDH12/ALAD	12
BP	GO:1901568	fatty acid derivative metabolic process	10/208	175/18866	2.52x10^-5	1.87x10^-4	1.39x10^-4	HMGCL/HMGCS2/ACAT1/ACSF3/AACS/ACOX1/BDH2/BDH1/ACSM2A/ACACA	10
BP	GO:0009308	amine metabolic process	9/208	140/18866	2.55x10^-5	1.88x10^-4	1.40x10^-4	ABAT/ALDH7A1/SMOX/KMO/IDO2/HAAO/TDO2/KYNU/AADAT	9
BP	GO:0043200	response to amino acid	8/208	114/18866	3.86x10^-5	2.75x10^-4	2.04x10^-4	ASS1/ASNS/CPS1/ARG1/PCK1/DHODH/ALAD/GCLC	8
BP	GO:0014074	response to purine-containing compound	9/208	149/18866	4.17x10^-5	2.95x10^-4	2.19x10^-4	AACS/ASS1/AGXT/CAD/CPS1/ADSS2/PCK1/NME1/DHODH	9
BP	GO:0019184	nonribosomal peptide biosynthetic process	4/208	19/18866	4.89x10^-5	3.42x10^-4	2.54x10^-4	CNDP2/BDH2/HAGH/GCLC	4
BP	GO:1901654	response to ketone	10/208	200/18866	7.80x10^-5	5.23x10^-4	3.89x10^-4	AACS/ASS1/CAD/CPS1/ARG1/ACACA/PCK1/PCK2/NME1/AKR1B1	10
BP	GO:0071548	response to dexamethasone	5/208	41/18866	8.42x10^-5	5.60x10^-4	4.16x10^-4	ASS1/CPS1/ARG1/PCK1/PCK2	5
BP	GO:0009410	response to xenobiotic stimulus	8/208	130/18866	9.81x10^-5	6.38x10^-4	4.74x10^-4	ACAA1/ACY1/ACSM2B/UGT2B28/UGT2B11/UGT1A8/UGT1A6/GCLC	8
BP	GO:0043312	neutrophil degranulation	16/208	487/18866	1.05x10^-4	6.77x10^-4	5.03x10^-4	ACAA1/NIT2/PKM/ARG1/ALDOC/ALDOA/CAT/NME2/ALAD/GGH/NAPRT/AGL/PGM1/PYGL/GYG1/PYGB	16
BP	GO:1901659	glycosyl compound biosynthetic process	5/208	43/18866	1.06x10^-4	6.83x10^-4	5.08x10^-4	CAD/NME1/NME2/DHODH/NME7	5
BP	GO:0002283	neutrophil activation involved in immune response	16/208	490/18866	1.13x10^-4	7.21x10^-4	5.36x10^-4	ACAA1/NIT2/PKM/ARG1/ALDOC/ALDOA/CAT/NME2/ALAD/GGH/NAPRT/AGL/PGM1/PYGL/GYG1/PYGB	16
BP	GO:0042440	pigment metabolic process	6/208	72/18866	1.43x10^-4	9.09x10^-4	6.76x10^-4	SHMT1/SHMT2/BDH2/ALAS1/ALAD/UGT1A8	6
BP	GO:0009396	folic acid-containing compound biosynthetic process	3/208	10/18866	1.50x10^-4	9.52x10^-4	7.07x10^-4	MTHFD1L/GCH1/MTHFD1	3
BP	GO:0071377	cellular response to glucagon stimulus	4/208	26/18866	1.77x10^-4	1.12x10^-3	8.35x10^-4	ASS1/CPS1/ARG1/PCK1	4
BP	GO:0019852	L-ascorbic acid metabolic process	3/208	11/18866	2.04x10^-4	1.26x10^-3	9.34x10^-4	RGN/AKR1A1/GCLC	3
BP	GO:1990748	cellular detoxification	7/208	114/18866	2.72x10^-4	1.66x10^-3	1.24x10^-3	CAT/RGN/ESD/ADH4/AKR1A1/GCH1/RDH12	7
BP	GO:0042133	neurotransmitter metabolic process	4/208	30/18866	3.14x10^-4	1.90x10^-3	1.41x10^-3	ABAT/ALDH9A1/ALDH5A1/PAH	4
BP	GO:0007494	midgut development	3/208	13/18866	3.48x10^-4	2.07x10^-3	1.54x10^-3	ASS1/CPS1/OTC	3
BP	GO:0071549	cellular response to dexamethasone stimulus	4/208	31/18866	3.58x10^-4	2.12x10^-3	1.57x10^-3	ASS1/ARG1/PCK1/PCK2	4
BP	GO:0071398	cellular response to fatty acid	5/208	57/18866	4.08x10^-4	2.41x10^-3	1.79x10^-3	ASS1/CPS1/ACACA/NME1/NME2	5
BP	GO:0045471	response to ethanol	7/208	122/18866	4.11x10^-4	2.41x10^-3	1.79x10^-3	ABAT/AACS/GOT2/CAT/ADH6/ALAD/GGH	7
BP	GO:0042573	retinoic acid metabolic process	4/208	33/18866	4.57x10^-4	2.62x10^-3	1.95x10^-3	ADH1C/ADH1A/ADH6/UGT1A8	4
BP	GO:0070365	hepatocyte differentiation	3/208	15/18866	5.45x10^-4	3.07x10^-3	2.28x10^-3	CPS1/PCK1/PCK2	3
BP	GO:0055081	anion homeostasis	5/208	62/18866	6.03x10^-4	3.38x10^-3	2.51x10^-3	GOT1/CPS1/GLS/OTC/ENPP1	5
BP	GO:1901658	glycosyl compound catabolic process	4/208	42/18866	1.16x10^-3	6.20x10^-3	4.61x10^-3	DPYD/DPYS/UPB1/GBA3	4
BP	GO:0006695	cholesterol biosynthetic process	5/208	75/18866	1.43x10^-3	7.57x10^-3	5.62x10^-3	ACAA2/HMGCS2/ACAT2/ACACB/ACACA	5
BP	GO:0009110	vitamin biosynthetic process	3/208	21/18866	1.52x10^-3	7.96x10^-3	5.92x10^-3	PSAT1/RGN/AKR1A1	3
BP	GO:0042593	glucose homeostasis	9/208	245/18866	1.63x10^-3	8.52x10^-3	6.34x10^-3	AACS/ACSM2A/PCK1/PCK2/NME1/NME2/GCLC/PYGL/G6PC2	9
BP	GO:0006979	response to oxidative stress	13/208	458/18866	1.77x10^-3	9.11x10^-3	6.77x10^-3	PYCR1/PYCR2/ARG1/MTR/CAT/HAO1/RGN/NME2/GCH1/LIAS/ALAD/NAPRT/GCLC	13
CC	GO:0005759	mitochondrial matrix	70/203	473/19559	8.58x10^-62	1.15x10^-59	9.67x10^-60	ACAA2/PCCA/ACADS/HMGCL/ABAT/ALDH1B1/HMGCS2/HADH/ECHS1/ALDH6A1/DBT/AGXT2/BCKDHB/ACADM/ALDH2/IVD/ACADSB/ACAT1/ACAD8/BCKDHA/MMUT/MCCC1/HADHA/ACSF3/PCCB/AUH/MCEE/ALDH7A1/HIBADH/HSD17B10/HADHB/MCCC2/GOT2/GLS2/ALDH5A1/GPT2/ALDH4A1/AGXT/CPS1/GLS/MLYCD/PYCR1/IDH2/PYCR2/OTC/SHMT2/PC/HOGA1/AMT/GLDC/GCSH/OGDHL/SUCLG2/ME2/ACSM5/BDH1/ACSM3/ACSM2B/ACSM2A/HAGH/PCK2/MTHFD1L/AK3/FLAD1/NADK2/ALAS1/LIAS/MMAB/AK4/AA…	70
CC	GO:0045239	tricarboxylic acid cycle enzyme complex	5/203	14/19559	2.13x10^-7	4.75x10^-6	3.99x10^-6	DBT/BCKDHB/BCKDHA/OGDHL/SUCLG2	5
CC	GO:0101002	ficolin-1-rich granule	10/203	124/19559	6.79x10^-7	1.14x10^-5	9.56x10^-6	PKM/ALDOC/ALDOA/CAT/NME2/ALAD/AGL/PGM1/PYGL/GYG1	10
CC	GO:1904813	ficolin-1-rich granule lumen	10/203	124/19559	6.79x10^-7	1.14x10^-5	9.56x10^-6	PKM/ALDOC/ALDOA/CAT/NME2/ALAD/AGL/PGM1/PYGL/GYG1	10
CC	GO:0031983	vesicle lumen	15/203	328/19559	1.83x10^-6	2.23x10^-5	1.87x10^-5	ACAA1/NIT2/PKM/ARG1/ALDOC/ALDOA/CAT/NME2/ALAD/GGH/NAPRT/AGL/PYGL/GYG1/PYGB	15
CC	GO:0009295	nucleoid	5/203	43/19559	8.01x10^-5	7.67x10^-4	6.44x10^-4	DBT/HADHA/HADHB/CPS1/SHMT2	5
CC	GO:1990204	oxidoreductase complex	7/203	110/19559	1.51x10^-4	1.35x10^-3	1.13x10^-3	DBT/BCKDHB/BCKDHA/GLDC/GCSH/OGDHL/SDHA	7
MF	GO:0019842	vitamin binding	34/208	144/18352	1.78x10^-35	4.48x10^-33	2.37x10^-33	PCCA/ABAT/AGXT2/MMUT/MCCC1/GOT2/GPT2/AGXT/GOT1/GPT/CSAD/SHMT1/SDS/TKT/CBS/PSAT1/SDSL/SHMT2/CTH/PC/MTR/GLDC/OGDHL/ACACB/ADH4/KYNU/ALAS1/MMAB/GGCX/TPK1/PYGL/PYGM/PYGB/AADAT	34
MF	GO:0016614	oxidoreductase activity, acting on CH-OH group of donors	29/208	130/18352	1.48x10^-29	1.86x10^-27	9.81x10^-28	HADH/EHHADH/HADHA/ALDH3A2/HIBADH/HSD17B10/HADHB/PHGDH/IDH2/HAO2/GRHPR/HAO1/ME2/BDH2/BDH1/ADH1C/ADH4/ADH1A/LDHD/ADH6/AKR1A1/RDH12/HSD17B6/DHRS3/CRYL1/SORD/AKR1B1/DCXR/DHDH	29
MF	GO:0030170	pyridoxal phosphate binding	22/208	55/18352	4.75x10^-29	2.98x10^-27	1.57x10^-27	ABAT/AGXT2/GOT2/GPT2/AGXT/GOT1/GPT/CSAD/SHMT1/SDS/CBS/PSAT1/SDSL/SHMT2/CTH/GLDC/KYNU/ALAS1/PYGL/PYGM/PYGB/AADAT	22
MF	GO:0070279	vitamin B6 binding	22/208	55/18352	4.75x10^-29	2.98x10^-27	1.57x10^-27	ABAT/AGXT2/GOT2/GPT2/AGXT/GOT1/GPT/CSAD/SHMT1/SDS/CBS/PSAT1/SDSL/SHMT2/CTH/GLDC/KYNU/ALAS1/PYGL/PYGM/PYGB/AADAT	22
MF	GO:0016829	lyase activity	31/208	189/18352	3.56x10^-27	1.79x10^-25	9.44x10^-26	HMGCL/ECHS1/EHHADH/BCKDHA/HADHA/AUH/HADHB/ADSL/ASL/GOT1/CSAD/MLYCD/ENO3/SHMT1/SDS/CBS/ACO1/ALDOB/SDSL/SHMT2/CTH/ALDOC/ALDOA/HOGA1/GLDC/TKFC/ME2/PCK1/PCK2/ALAD/GGCX	31
MF	GO:0016874	ligase activity	25/208	165/18352	3.47x10^-21	1.24x10^-19	6.58x10^-20	PCCA/MCCC1/ACSF3/PCCB/MCCC2/AACS/ASS1/ASNS/CAD/CPS1/ADSS2/ADSS1/PC/SUCLG2/ACSM5/ACSM3/ACSM2B/ACSM2A/ACACB/ACACA/MTHFD1L/EPRS1/MTHFD1/NAPRT/GCLC	25
MF	GO:0016903	oxidoreductase activity, acting on the aldehyde or oxo group of donors	16/208	43/18352	8.38x10^-21	2.63x10^-19	1.39x10^-19	ALDH1B1/ALDH6A1/BCKDHB/ALDH9A1/ALDH2/BCKDHA/ALDH3A2/ALDH7A1/AOX1/ALDH5A1/ALDH4A1/ALDH18A1/GAPDH/OGDHL/ADH4/AKR1B1	16
MF	GO:0016769	transferase activity, transferring nitrogenous groups	13/208	23/18352	3.61x10^-20	1.01x10^-18	5.33x10^-19	ABAT/AGXT2/BCAT1/GOT2/GPT2/GFPT1/AGXT/GOT1/GPT/PSAT1/GAPDH/AMT/AADAT	13
MF	GO:0031406	carboxylic acid binding	26/208	212/18352	1.32x10^-19	3.30x10^-18	1.75x10^-18	PCCA/HMGCL/DBT/MCCC1/GOT2/ASS1/AGXT/CAD/GOT1/CPS1/ACOX3/DPYS/ACOX1/SHMT1/OTC/SHMT2/PC/GRHPR/GLDC/ACACB/PCK1/NME2/TDO2/UGT1A8/GCLC/PYGL	26
MF	GO:0043177	organic acid binding	26/208	224/18352	5.36x10^-19	1.22x10^-17	6.46x10^-18	PCCA/HMGCL/DBT/MCCC1/GOT2/ASS1/AGXT/CAD/GOT1/CPS1/ACOX3/DPYS/ACOX1/SHMT1/OTC/SHMT2/PC/GRHPR/GLDC/ACACB/PCK1/NME2/TDO2/UGT1A8/GCLC/PYGL	26
MF	GO:0051287	NAD binding	15/208	55/18352	3.14x10^-17	5.63x10^-16	2.97x10^-16	ALDH1B1/HADH/ALDH2/HADHA/HIBADH/AOX1/PHGDH/IDH2/GAPDH/GRHPR/ME2/BDH2/ADH4/CRYL1/SORD	15
MF	GO:0016408	C-acyltransferase activity	10/208	20/18352	4.71x10^-15	7.39x10^-14	3.91x10^-14	ACAA2/ACAA1/ACAT1/HADHA/ACAT2/HADHB/ACSM5/ACSM3/ACSM2B/ACSM2A	10
MF	GO:0016627	oxidoreductase activity, acting on the CH-CH group of donors	13/208	59/18352	8.94x10^-14	1.32x10^-12	6.98x10^-13	ACADS/ACAA1/ACADM/IVD/ACADSB/ACAD8/DPYD/ACOX3/ACOX1/SDHA/BDH2/DHODH/DHDH	13
MF	GO:0009055	electron transfer activity	13/208	111/18352	3.96x10^-10	4.52x10^-9	2.39x10^-9	ALDH2/AOX1/ALDH4A1/PHGDH/GLDC/SDHA/ME2/AKR1A1/HAAO/HSD17B6/DHRS3/AKR1B1/DHDH	13
MF	GO:0016810	hydrolase activity, acting on carbon-nitrogen (but not peptide) bonds	13/208	121/18352	1.17x10^-9	1.23x10^-8	6.48x10^-9	GLS2/ASPA/NIT2/CAD/ASRGL1/GLS/DPYS/UPB1/ARG1/ACY1/CAT/GCH1/MTHFD1	13
MF	GO:0015020	glucuronosyltransferase activity	7/208	32/18352	5.75x10^-8	4.37x10^-7	2.31x10^-7	UGT2B7/UGT2B28/UGT2B11/UGT2B4/UGT2B17/UGT1A8/UGT1A6	7
MF	GO:1901681	sulfur compound binding	15/208	262/18352	3.23x10^-7	2.08x10^-6	1.10x10^-6	PCCA/HMGCL/ALDH6A1/DBT/MCCC1/HADHA/TKT/CBS/PC/OGDHL/ACACB/ACOT12/PANK1/TPK1/ENPP1	15
MF	GO:0000287	magnesium ion binding	12/208	217/18352	7.16x10^-6	3.83x10^-5	2.02x10^-5	HMGCL/ADSS2/ADSS1/ENO3/TKT/PKM/IDH2/SUCLG2/PCK1/NME1/GCLC/PGM1	12
MF	GO:0120227	acyl-CoA binding	5/208	25/18352	7.87x10^-6	4.12x10^-5	2.18x10^-5	HMGCL/ALDH6A1/HADHA/ACOT12/PANK1	5
MF	GO:0016645	oxidoreductase activity, acting on the CH-NH group of donors	5/208	28/18352	1.42x10^-5	6.71x10^-5	3.55x10^-5	ALDH4A1/SMOX/PYCR1/PYCR2/MTHFD1	5
MF	GO:0004550	nucleoside diphosphate kinase activity	4/208	18/18352	4.33x10^-5	1.91x10^-4	1.01x10^-4	NME1/NME2/AK4/NME7	4
MF	GO:0016853	isomerase activity	9/208	156/18352	7.36x10^-5	3.18x10^-4	1.68x10^-4	EHHADH/MMUT/MCEE/RPIA/HYI/PGM1/PGM2L1/BPGM/GALM	9
MF	GO:0016776	phosphotransferase activity, phosphate group as acceptor	5/208	40/18352	8.49x10^-5	3.55x10^-4	1.88x10^-4	NME1/NME2/AK3/AK4/NME7	5
MF	GO:0000062	fatty-acyl-CoA binding	4/208	22/18352	9.99x10^-5	4.11x10^-4	2.17x10^-4	HMGCL/ALDH6A1/HADHA/ACOT12	4
MF	GO:0048029	monosaccharide binding	6/208	69/18352	1.31x10^-4	5.20x10^-4	2.75x10^-4	ALDOB/ALDOA/RPIA/FBP1/UGP2/PYGL	6
MF	GO:0031419	cobalamin binding	3/208	10/18352	1.62x10^-4	6.08x10^-4	3.21x10^-4	MMUT/MTR/MMAB	3
MF	GO:0016702	oxidoreductase activity, acting on single donors with incorporation of molecular oxygen, incorporation of two atoms of oxygen	4/208	25/18352	1.68x10^-4	6.21x10^-4	3.28x10^-4	IDO2/HAAO/TDO2/HPD	4
MF	GO:0030246	carbohydrate binding	11/208	267/18352	2.44x10^-4	8.49x10^-4	4.49x10^-4	ALDOB/ALDOA/RPIA/FBP1/UGP2/SORD/AGL/PYGL/ENPP1/SI/GALM	11
MF	GO:0042301	phosphate ion binding	3/208	12/18352	2.93x10^-4	9.80x10^-4	5.18x10^-4	ADSS2/ADSS1/OTC	3
MF	GO:1901567	fatty acid derivative binding	4/208	29/18352	3.05x10^-4	1.01x10^-3	5.32x10^-4	HMGCL/ALDH6A1/HADHA/ACOT12	4
MF	GO:0015926	glucosidase activity	3/208	14/18352	4.76x10^-4	1.55x10^-3	8.21x10^-4	GBA3/AGL/SI	3
MF	GO:0016805	dipeptidase activity	3/208	15/18352	5.90x10^-4	1.90x10^-3	1.00x10^-3	FOLH1/CNDP1/CNDP2	3
MF	GO:0030145	manganese ion binding	5/208	64/18352	7.90x10^-4	2.48x10^-3	1.31x10^-3	HMGCL/ARG1/PCK1/PCK2/GYG1	5
MF	GO:0051536	iron-sulfur cluster binding	5/208	67/18352	9.73x10^-4	2.98x10^-3	1.57x10^-3	ABAT/AOX1/DPYD/ACO1/LIAS	5
MF	GO:0051540	metal cluster binding	5/208	67/18352	9.73x10^-4	2.98x10^-3	1.57x10^-3	ABAT/AOX1/DPYD/ACO1/LIAS	5
MF	GO:0016790	thiolester hydrolase activity	4/208	40/18352	1.06x10^-3	3.18x10^-3	1.68x10^-3	ACAA2/ESD/ACOT12/HAGH	4
MF	GO:0046906	tetrapyrrole binding	7/208	148/18352	1.51x10^-3	4.46x10^-3	2.36x10^-3	MMUT/CBS/MTR/CAT/IDO2/TDO2/MMAB	7
Bg ratio, background ratio; BP, biological process; CC, cellular component; MF, molecular function.
Table SVII. Protein interaction analysis of carbohydrate-associated differentially expressed genes based on the STRING database.
Node 1	Node 2	Node 1 STRING ID	Node 2 STRING ID	Neighborhood on chromosome	Gene fusion	Phylogenetic co-occurrence	Homology	Co-expression	Experimentally determined interaction	Database annotated	Automated text mining	Combined score
AACS	EHHADH	9606.ENSP00000324842	9606.ENSP00000231887	0.000	0.000	0.000	0.000	0.099	0.000	0.900	0.131	0.914
AACS	ACAT1	9606.ENSP00000324842	9606.ENSP00000265838	0.054	0.000	0.000	0.000	0.109	0.000	0.900	0.477	0.950
AACS	BDH2	9606.ENSP00000324842	9606.ENSP00000296424	0.000	0.000	0.000	0.000	0.062	0.000	0.900	0.136	0.911
AACS	BCAT1	9606.ENSP00000324842	9606.ENSP00000443459	0.000	0.000	0.000	0.000	0.062	0.726	0.000	0.144	0.760
AACS	CNDP2	9606.ENSP00000324842	9606.ENSP00000325548	0.000	0.000	0.000	0.000	0.062	0.788	0.000	0.076	0.800
AACS	HMGCL	9606.ENSP00000324842	9606.ENSP00000363614	0.060	0.000	0.000	0.000	0.084	0.000	0.900	0.361	0.937
AACS	ACAT2	9606.ENSP00000324842	9606.ENSP00000356015	0.054	0.000	0.000	0.000	0.109	0.000	0.900	0.360	0.938
AACS	BDH1	9606.ENSP00000324842	9606.ENSP00000376184	0.000	0.000	0.000	0.000	0.062	0.000	0.900	0.453	0.944
AACS	HMGCS2	9606.ENSP00000324842	9606.ENSP00000358414	0.000	0.000	0.000	0.000	0.145	0.000	0.900	0.449	0.948
AADAT	GOT2	9606.ENSP00000423190	9606.ENSP00000245206	0.094	0.000	0.000	0.000	0.097	0.000	0.000	0.696	0.729
AADAT	KYNU	9606.ENSP00000423190	9606.ENSP00000264170	0.000	0.000	0.000	0.000	0.065	0.000	0.900	0.827	0.982
AADAT	HAAO	9606.ENSP00000423190	9606.ENSP00000294973	0.000	0.000	0.000	0.000	0.082	0.000	0.000	0.808	0.817
AADAT	KMO	9606.ENSP00000423190	9606.ENSP00000355517	0.000	0.000	0.000	0.000	0.064	0.000	0.900	0.898	0.989
AADAT	ALDH7A1	9606.ENSP00000423190	9606.ENSP00000387123	0.000	0.000	0.000	0.000	0.090	0.000	0.900	0.196	0.920
AADAT	TDO2	9606.ENSP00000423190	9606.ENSP00000444788	0.000	0.000	0.000	0.000	0.076	0.000	0.000	0.695	0.706
AADAT	BCAT1	9606.ENSP00000423190	9606.ENSP00000443459	0.157	0.000	0.000	0.000	0.088	0.000	0.000	0.666	0.721
ABAT	AGXT2	9606.ENSP00000379845	9606.ENSP00000231420	0.000	0.000	0.000	0.582	0.085	0.788	0.900	0.625	0.984
ABAT	EHHADH	9606.ENSP00000379845	9606.ENSP00000231887	0.000	0.000	0.000	0.000	0.062	0.101	0.900	0.261	0.929
ABAT	ACADS	9606.ENSP00000379845	9606.ENSP00000242592	0.041	0.000	0.000	0.000	0.000	0.000	0.800	0.230	0.839
ABAT	GOT2	9606.ENSP00000379845	9606.ENSP00000245206	0.000	0.000	0.000	0.000	0.062	0.760	0.000	0.257	0.818
ABAT	ALDH2	9606.ENSP00000379845	9606.ENSP00000261733	0.053	0.000	0.000	0.000	0.110	0.562	0.900	0.235	0.966
ABAT	HIBADH	9606.ENSP00000379845	9606.ENSP00000265395	0.000	0.000	0.000	0.000	0.063	0.000	0.900	0.144	0.912
ABAT	SORD	9606.ENSP00000379845	9606.ENSP00000267814	0.160	0.000	0.000	0.000	0.063	0.679	0.000	0.195	0.769
ABAT	ACOX1	9606.ENSP00000379845	9606.ENSP00000293217	0.041	0.000	0.000	0.000	0.065	0.000	0.800	0.076	0.812
ABAT	DCXR	9606.ENSP00000379845	9606.ENSP00000303356	0.000	0.000	0.000	0.000	0.069	0.760	0.000	0.000	0.767
ABAT	ALDH5A1	9606.ENSP00000379845	9606.ENSP00000314649	0.053	0.000	0.000	0.000	0.529	0.380	0.900	0.880	0.996
ABAT	UPB1	9606.ENSP00000379845	9606.ENSP00000324343	0.070	0.000	0.000	0.000	0.092	0.000	0.900	0.390	0.941
ABAT	CNDP2	9606.ENSP00000379845	9606.ENSP00000325548	0.073	0.000	0.000	0.000	0.062	0.061	0.900	0.101	0.913
ABAT	GPT2	9606.ENSP00000379845	9606.ENSP00000345282	0.000	0.000	0.000	0.000	0.062	0.726	0.000	0.213	0.780
ABAT	ALDH3A2	9606.ENSP00000379845	9606.ENSP00000345774	0.053	0.000	0.000	0.000	0.110	0.200	0.900	0.117	0.929
ABAT	ALDH9A1	9606.ENSP00000379845	9606.ENSP00000346827	0.053	0.000	0.000	0.000	0.110	0.328	0.900	0.189	0.945
ABAT	ACOX3	9606.ENSP00000379845	9606.ENSP00000348775	0.041	0.000	0.000	0.000	0.064	0.000	0.800	0.076	0.811
ABAT	CNDP1	9606.ENSP00000379845	9606.ENSP00000351682	0.073	0.000	0.000	0.000	0.107	0.061	0.900	0.195	0.926
ABAT	PHGDH	9606.ENSP00000379845	9606.ENSP00000358417	0.076	0.000	0.000	0.000	0.048	0.788	0.000	0.153	0.821
ABAT	DBT	9606.ENSP00000379845	9606.ENSP00000359151	0.000	0.000	0.000	0.000	0.062	0.000	0.800	0.138	0.824
ABAT	GOT1	9606.ENSP00000379845	9606.ENSP00000359539	0.000	0.000	0.000	0.000	0.074	0.245	0.000	0.712	0.781
ABAT	PGM1	9606.ENSP00000379845	9606.ENSP00000360124	0.000	0.000	0.000	0.000	0.123	0.745	0.000	0.085	0.778
ABAT	OGDHL	9606.ENSP00000379845	9606.ENSP00000363216	0.000	0.000	0.000	0.000	0.084	0.000	0.000	0.690	0.704
ABAT	AOX1	9606.ENSP00000379845	9606.ENSP00000363832	0.000	0.000	0.000	0.000	0.063	0.000	0.900	0.107	0.909
ABAT	PCCA	9606.ENSP00000379845	9606.ENSP00000365462	0.000	0.000	0.000	0.000	0.063	0.000	0.800	0.250	0.847
ABAT	ALDH1B1	9606.ENSP00000379845	9606.ENSP00000366927	0.053	0.000	0.000	0.000	0.110	0.562	0.900	0.315	0.970
ABAT	GPT	9606.ENSP00000379845	9606.ENSP00000378408	0.000	0.000	0.000	0.000	0.062	0.726	0.000	0.365	0.822
ABAT	PCCB	9606.ENSP00000379845	9606.ENSP00000419027	0.000	0.000	0.000	0.000	0.062	0.000	0.800	0.132	0.822
ABAT	ALDH6A1	9606.ENSP00000379845	9606.ENSP00000450436	0.000	0.000	0.000	0.000	0.185	0.000	0.900	0.578	0.962
ABAT	ALDH7A1	9606.ENSP00000379845	9606.ENSP00000387123	0.053	0.000	0.000	0.000	0.110	0.839	0.900	0.162	0.986
ACAA1	HSD17B10	9606.ENSP00000333664	9606.ENSP00000168216	0.000	0.000	0.000	0.000	0.128	0.056	0.900	0.357	0.940
ACAA1	EHHADH	9606.ENSP00000333664	9606.ENSP00000231887	0.057	0.126	0.000	0.000	0.165	0.251	0.900	0.827	0.989
ACAA1	CAT	9606.ENSP00000333664	9606.ENSP00000241052	0.000	0.000	0.000	0.000	0.166	0.335	0.000	0.717	0.829
ACAA1	ACADS	9606.ENSP00000333664	9606.ENSP00000242592	0.055	0.000	0.000	0.000	0.218	0.102	0.900	0.760	0.981
ACAA1	ACAT1	9606.ENSP00000333664	9606.ENSP00000265838	0.000	0.000	0.447	0.767	0.090	0.128	0.900	0.915	0.938
ACAA1	ACAA2	9606.ENSP00000333664	9606.ENSP00000285093	0.000	0.000	0.447	0.845	0.084	0.128	0.800	0.768	0.856
ACAA1	ACOX1	9606.ENSP00000333664	9606.ENSP00000293217	0.055	0.000	0.000	0.000	0.372	0.151	0.900	0.870	0.992
ACAA1	HADHB	9606.ENSP00000333664	9606.ENSP00000325136	0.000	0.000	0.436	0.797	0.092	0.000	0.800	0.457	0.841
ACAA1	ACSF3	9606.ENSP00000333664	9606.ENSP00000479130	0.071	0.000	0.000	0.000	0.085	0.000	0.000	0.723	0.744
ACAA1	ECHS1	9606.ENSP00000333664	9606.ENSP00000357535	0.057	0.000	0.000	0.000	0.180	0.251	0.000	0.662	0.778
ACAA1	ACADM	9606.ENSP00000333664	9606.ENSP00000359871	0.055	0.000	0.000	0.000	0.162	0.102	0.000	0.756	0.803
ACAA1	DBT	9606.ENSP00000333664	9606.ENSP00000359151	0.046	0.000	0.000	0.000	0.065	0.000	0.800	0.163	0.830
ACAA1	SUCLG2	9606.ENSP00000333664	9606.ENSP00000419325	0.048	0.000	0.000	0.000	0.085	0.000	0.800	0.147	0.831
ACAA1	ACAT2	9606.ENSP00000333664	9606.ENSP00000356015	0.000	0.000	0.448	0.860	0.086	0.000	0.900	0.829	0.920
ACAA1	ALDH6A1	9606.ENSP00000333664	9606.ENSP00000450436	0.000	0.000	0.000	0.000	0.185	0.000	0.900	0.213	0.930
ACAA1	PCCB	9606.ENSP00000333664	9606.ENSP00000419027	0.093	0.000	0.000	0.000	0.112	0.000	0.900	0.306	0.936
ACAA1	PCCA	9606.ENSP00000333664	9606.ENSP00000365462	0.078	0.000	0.000	0.000	0.087	0.228	0.900	0.219	0.940
ACAA1	HMGCL	9606.ENSP00000333664	9606.ENSP00000363614	0.049	0.000	0.000	0.000	0.109	0.000	0.900	0.580	0.959
ACAA1	HMGCS2	9606.ENSP00000333664	9606.ENSP00000358414	0.093	0.000	0.000	0.000	0.145	0.345	0.900	0.427	0.965
ACAA1	ACOX3	9606.ENSP00000333664	9606.ENSP00000348775	0.055	0.000	0.000	0.000	0.161	0.102	0.900	0.737	0.977
ACAA1	ACADSB	9606.ENSP00000333664	9606.ENSP00000357873	0.055	0.000	0.000	0.000	0.166	0.102	0.900	0.782	0.981
ACAA1	HADHA	9606.ENSP00000333664	9606.ENSP00000370023	0.057	0.047	0.000	0.000	0.165	0.251	0.900	0.779	0.984
ACAA1	HADH	9606.ENSP00000333664	9606.ENSP00000474560	0.093	0.077	0.258	0.000	0.156	0.368	0.900	0.771	0.990
ACAA2	HSD17B10	9606.ENSP00000285093	9606.ENSP00000168216	0.000	0.001	0.000	0.000	0.187	0.285	0.900	0.655	0.977
ACAA2	EHHADH	9606.ENSP00000285093	9606.ENSP00000231887	0.057	0.048	0.000	0.000	0.154	0.251	0.900	0.749	0.982
ACAA2	ACADS	9606.ENSP00000285093	9606.ENSP00000242592	0.055	0.000	0.000	0.000	0.198	0.398	0.900	0.770	0.987
ACAA2	ACAT1	9606.ENSP00000285093	9606.ENSP00000265838	0.000	0.000	0.448	0.870	0.186	0.641	0.900	0.924	0.973
ACAA2	ACAD8	9606.ENSP00000285093	9606.ENSP00000281182	0.055	0.000	0.000	0.000	0.653	0.247	0.000	0.355	0.819
ACAA2	ACSF3	9606.ENSP00000285093	9606.ENSP00000479130	0.071	0.000	0.000	0.000	0.169	0.000	0.000	0.677	0.729
ACAA2	DBT	9606.ENSP00000285093	9606.ENSP00000359151	0.046	0.000	0.000	0.000	0.071	0.000	0.800	0.168	0.833
ACAA2	SUCLG2	9606.ENSP00000285093	9606.ENSP00000419325	0.048	0.000	0.000	0.000	0.120	0.000	0.800	0.143	0.837
ACAA2	ACAT2	9606.ENSP00000285093	9606.ENSP00000356015	0.000	0.000	0.448	0.899	0.091	0.000	0.900	0.724	0.915
ACAA2	PCCB	9606.ENSP00000285093	9606.ENSP00000419027	0.093	0.000	0.000	0.000	0.112	0.000	0.900	0.142	0.921
ACAA2	ALDH6A1	9606.ENSP00000285093	9606.ENSP00000450436	0.000	0.000	0.000	0.000	0.192	0.000	0.900	0.102	0.921
ACAA2	HADHB	9606.ENSP00000285093	9606.ENSP00000325136	0.000	0.000	0.443	0.808	0.551	0.000	0.800	0.733	0.925
ACAA2	PCCA	9606.ENSP00000285093	9606.ENSP00000365462	0.078	0.000	0.000	0.000	0.087	0.228	0.900	0.180	0.937
ACAA2	HMGCL	9606.ENSP00000285093	9606.ENSP00000363614	0.049	0.000	0.000	0.000	0.241	0.000	0.900	0.408	0.951
ACAA2	ACOX3	9606.ENSP00000285093	9606.ENSP00000348775	0.055	0.000	0.000	0.000	0.178	0.102	0.900	0.460	0.955
ACAA2	ACOX1	9606.ENSP00000285093	9606.ENSP00000293217	0.055	0.000	0.000	0.000	0.158	0.102	0.900	0.628	0.968
ACAA2	HMGCS2	9606.ENSP00000285093	9606.ENSP00000358414	0.093	0.000	0.000	0.000	0.145	0.345	0.900	0.479	0.968
ACAA2	ECHS1	9606.ENSP00000285093	9606.ENSP00000357535	0.057	0.000	0.000	0.000	0.773	0.419	0.000	0.807	0.972
ACAA2	ACADM	9606.ENSP00000285093	9606.ENSP00000359871	0.055	0.000	0.000	0.000	0.840	0.426	0.000	0.809	0.981
ACAA2	ACADSB	9606.ENSP00000285093	9606.ENSP00000357873	0.055	0.000	0.000	0.000	0.175	0.260	0.900	0.739	0.982
ACAA2	HADH	9606.ENSP00000285093	9606.ENSP00000474560	0.093	0.031	0.270	0.000	0.292	0.416	0.900	0.704	0.990
ACAA2	HADHA	9606.ENSP00000285093	9606.ENSP00000370023	0.057	0.019	0.000	0.000	0.284	0.391	0.900	0.898	0.995
ACACA	MLYCD	9606.ENSP00000483300	9606.ENSP00000262430	0.000	0.000	0.000	0.000	0.062	0.000	0.800	0.558	0.909
ACACA	ACAT1	9606.ENSP00000483300	9606.ENSP00000265838	0.044	0.000	0.000	0.000	0.062	0.000	0.900	0.341	0.933
ACACA	ACOX1	9606.ENSP00000483300	9606.ENSP00000293217	0.044	0.000	0.000	0.000	0.049	0.000	0.000	0.709	0.712
ACACA	ACOT12	9606.ENSP00000483300	9606.ENSP00000303246	0.051	0.000	0.000	0.000	0.065	0.000	0.900	0.063	0.905
ACACA	ACACB	9606.ENSP00000483300	9606.ENSP00000341044	0.000	0.000	0.000	0.977	0.000	0.000	0.900	0.803	0.901
ACACA	ACAT2	9606.ENSP00000483300	9606.ENSP00000356015	0.044	0.000	0.000	0.000	0.065	0.000	0.900	0.299	0.929
ACACA	SUCLG2	9606.ENSP00000483300	9606.ENSP00000419325	0.000	0.000	0.000	0.000	0.134	0.000	0.800	0.214	0.852
ACACA	ALDH6A1	9606.ENSP00000483300	9606.ENSP00000450436	0.000	0.000	0.000	0.000	0.064	0.000	0.900	0.200	0.918
ACACA	ACSF3	9606.ENSP00000483300	9606.ENSP00000479130	0.000	0.000	0.000	0.000	0.062	0.000	0.900	0.389	0.937
ACACB	MLYCD	9606.ENSP00000341044	9606.ENSP00000262430	0.000	0.000	0.000	0.000	0.063	0.000	0.800	0.517	0.901
ACACB	ACAT1	9606.ENSP00000341044	9606.ENSP00000265838	0.044	0.000	0.000	0.000	0.062	0.000	0.900	0.186	0.917
ACACB	ACOT12	9606.ENSP00000341044	9606.ENSP00000303246	0.051	0.000	0.000	0.000	0.065	0.000	0.900	0.048	0.904
ACACB	SUCLG2	9606.ENSP00000341044	9606.ENSP00000419325	0.000	0.000	0.000	0.000	0.134	0.000	0.800	0.187	0.846
ACACB	ACAT2	9606.ENSP00000341044	9606.ENSP00000356015	0.044	0.000	0.000	0.000	0.062	0.000	0.900	0.193	0.917
ACACB	ACSF3	9606.ENSP00000341044	9606.ENSP00000479130	0.000	0.000	0.000	0.000	0.062	0.000	0.900	0.279	0.926
ACACB	ALDH6A1	9606.ENSP00000341044	9606.ENSP00000450436	0.000	0.000	0.000	0.000	0.087	0.000	0.900	0.308	0.931
ACAD8	EHHADH	9606.ENSP00000281182	9606.ENSP00000231887	0.049	0.000	0.000	0.000	0.122	0.197	0.900	0.244	0.940
ACAD8	ACADS	9606.ENSP00000281182	9606.ENSP00000242592	0.000	0.000	0.414	0.860	0.069	0.176	0.800	0.878	0.861
ACAD8	BCKDHA	9606.ENSP00000281182	9606.ENSP00000269980	0.000	0.009	0.000	0.000	0.118	0.000	0.900	0.162	0.919
ACAD8	ACADSB	9606.ENSP00000281182	9606.ENSP00000357873	0.000	0.000	0.410	0.823	0.065	0.374	0.800	0.910	0.900
ACAD8	DBT	9606.ENSP00000281182	9606.ENSP00000359151	0.047	0.000	0.000	0.000	0.093	0.000	0.900	0.236	0.925
ACAD8	BCKDHB	9606.ENSP00000281182	9606.ENSP00000318351	0.000	0.000	0.000	0.000	0.109	0.058	0.900	0.282	0.931
ACAD8	HADHA	9606.ENSP00000281182	9606.ENSP00000370023	0.049	0.000	0.000	0.000	0.124	0.197	0.900	0.249	0.940
ACAD8	ECHS1	9606.ENSP00000281182	9606.ENSP00000357535	0.049	0.000	0.211	0.000	0.122	0.209	0.900	0.213	0.949
ACADM	EHHADH	9606.ENSP00000359871	9606.ENSP00000231887	0.049	0.000	0.000	0.000	0.122	0.197	0.000	0.677	0.754
ACADM	ACOX1	9606.ENSP00000359871	9606.ENSP00000293217	0.000	0.000	0.000	0.000	0.082	0.000	0.000	0.789	0.798
ACADM	HADHB	9606.ENSP00000359871	9606.ENSP00000325136	0.055	0.000	0.000	0.000	0.587	0.391	0.000	0.730	0.927
ACADM	ECHS1	9606.ENSP00000359871	9606.ENSP00000357535	0.049	0.000	0.224	0.000	0.186	0.419	0.000	0.542	0.811
ACADM	ACSF3	9606.ENSP00000359871	9606.ENSP00000479130	0.055	0.000	0.000	0.000	0.190	0.000	0.000	0.685	0.738
ACADM	SUCLG2	9606.ENSP00000359871	9606.ENSP00000419325	0.060	0.000	0.000	0.000	0.206	0.643	0.000	0.324	0.796
ACADM	HADHA	9606.ENSP00000359871	9606.ENSP00000370023	0.049	0.000	0.000	0.000	0.259	0.389	0.000	0.699	0.853
ACADM	HADH	9606.ENSP00000359871	9606.ENSP00000474560	0.071	0.000	0.374	0.000	0.290	0.389	0.000	0.688	0.907
ACADS	AGXT2	9606.ENSP00000242592	9606.ENSP00000231420	0.041	0.000	0.000	0.000	0.062	0.000	0.800	0.319	0.861
ACADS	EHHADH	9606.ENSP00000242592	9606.ENSP00000231887	0.049	0.000	0.000	0.000	0.122	0.199	0.900	0.625	0.970
ACADS	ACSF3	9606.ENSP00000242592	9606.ENSP00000479130	0.055	0.000	0.000	0.000	0.122	0.000	0.000	0.708	0.736
ACADS	ACADSB	9606.ENSP00000242592	9606.ENSP00000357873	0.000	0.000	0.447	0.889	0.069	0.000	0.800	0.739	0.830
ACADS	ALDH3A2	9606.ENSP00000242592	9606.ENSP00000345774	0.045	0.000	0.000	0.000	0.062	0.000	0.800	0.181	0.833
ACADS	ALDH7A1	9606.ENSP00000242592	9606.ENSP00000387123	0.045	0.000	0.000	0.000	0.062	0.000	0.800	0.199	0.837
ACADS	AOX1	9606.ENSP00000242592	9606.ENSP00000363832	0.000	0.000	0.000	0.000	0.065	0.000	0.800	0.204	0.838
ACADS	ACOX3	9606.ENSP00000242592	9606.ENSP00000348775	0.000	0.000	0.000	0.575	0.064	0.000	0.800	0.452	0.840
ACADS	ACOX1	9606.ENSP00000242592	9606.ENSP00000293217	0.000	0.000	0.000	0.562	0.065	0.000	0.800	0.578	0.852
ACADS	ALDH1B1	9606.ENSP00000242592	9606.ENSP00000366927	0.045	0.000	0.000	0.000	0.066	0.000	0.800	0.319	0.862
ACADS	ALDH9A1	9606.ENSP00000242592	9606.ENSP00000346827	0.045	0.000	0.000	0.000	0.065	0.000	0.800	0.366	0.871
ACADS	ALDH2	9606.ENSP00000242592	9606.ENSP00000261733	0.045	0.000	0.000	0.000	0.066	0.000	0.800	0.408	0.880
ACADS	HIBADH	9606.ENSP00000242592	9606.ENSP00000265395	0.053	0.000	0.000	0.000	0.210	0.139	0.800	0.248	0.885
ACADS	HADH	9606.ENSP00000242592	9606.ENSP00000474560	0.071	0.003	0.370	0.000	0.550	0.142	0.000	0.617	0.897
ACADS	ACSM5	9606.ENSP00000242592	9606.ENSP00000327916	0.000	0.009	0.000	0.000	0.066	0.000	0.900	0.090	0.907
ACADS	DBT	9606.ENSP00000242592	9606.ENSP00000359151	0.047	0.000	0.000	0.000	0.066	0.000	0.900	0.085	0.907
ACADS	ACSM2A	9606.ENSP00000242592	9606.ENSP00000459451	0.000	0.010	0.000	0.000	0.066	0.000	0.900	0.274	0.926
ACADS	ACSM2B	9606.ENSP00000242592	9606.ENSP00000327453	0.000	0.008	0.000	0.000	0.066	0.000	0.900	0.280	0.926
ACADS	PCCB	9606.ENSP00000242592	9606.ENSP00000419027	0.071	0.000	0.000	0.000	0.112	0.000	0.900	0.263	0.931
ACADS	ACSM3	9606.ENSP00000242592	9606.ENSP00000289416	0.000	0.005	0.000	0.000	0.066	0.000	0.900	0.417	0.940
ACADS	PCCA	9606.ENSP00000242592	9606.ENSP00000365462	0.071	0.000	0.000	0.000	0.107	0.067	0.900	0.498	0.954
ACADS	ACAT2	9606.ENSP00000242592	9606.ENSP00000356015	0.055	0.000	0.000	0.000	0.445	0.102	0.900	0.406	0.966
ACADS	ALDH6A1	9606.ENSP00000242592	9606.ENSP00000450436	0.000	0.000	0.000	0.000	0.645	0.076	0.900	0.330	0.975
ACADS	ACAT1	9606.ENSP00000242592	9606.ENSP00000265838	0.055	0.000	0.000	0.000	0.445	0.102	0.900	0.579	0.976
ACADS	HADHB	9606.ENSP00000242592	9606.ENSP00000325136	0.055	0.000	0.000	0.000	0.476	0.102	0.900	0.695	0.983
ACADS	HADHA	9606.ENSP00000242592	9606.ENSP00000370023	0.049	0.000	0.000	0.000	0.122	0.392	0.900	0.737	0.984
ACADS	ECHS1	9606.ENSP00000242592	9606.ENSP00000357535	0.049	0.000	0.277	0.000	0.588	0.386	0.900	0.644	0.992
ACADSB	EHHADH	9606.ENSP00000357873	9606.ENSP00000231887	0.049	0.000	0.000	0.000	0.122	0.199	0.900	0.574	0.966
ACADSB	ACAT1	9606.ENSP00000357873	9606.ENSP00000265838	0.055	0.000	0.000	0.000	0.448	0.102	0.900	0.454	0.969
ACADSB	BCKDHA	9606.ENSP00000357873	9606.ENSP00000269980	0.000	0.000	0.000	0.000	0.111	0.000	0.900	0.407	0.942
ACADSB	ACOX1	9606.ENSP00000357873	9606.ENSP00000293217	0.000	0.000	0.000	0.000	0.062	0.000	0.800	0.353	0.868
ACADSB	BCKDHB	9606.ENSP00000357873	9606.ENSP00000318351	0.000	0.000	0.000	0.000	0.083	0.058	0.900	0.433	0.944
ACADSB	HADHB	9606.ENSP00000357873	9606.ENSP00000325136	0.055	0.000	0.000	0.000	0.218	0.102	0.900	0.653	0.972
ACADSB	ACOX3	9606.ENSP00000357873	9606.ENSP00000348775	0.000	0.000	0.000	0.569	0.065	0.000	0.800	0.356	0.832
ACADSB	ACAT2	9606.ENSP00000357873	9606.ENSP00000356015	0.055	0.000	0.000	0.000	0.445	0.102	0.900	0.386	0.965
ACADSB	ECHS1	9606.ENSP00000357873	9606.ENSP00000357535	0.049	0.000	0.300	0.000	0.357	0.258	0.900	0.578	0.983
ACADSB	ACSF3	9606.ENSP00000357873	9606.ENSP00000479130	0.055	0.000	0.000	0.000	0.150	0.000	0.000	0.723	0.758
ACADSB	HADH	9606.ENSP00000357873	9606.ENSP00000474560	0.071	0.002	0.370	0.000	0.569	0.142	0.000	0.429	0.854
ACADSB	ALDH6A1	9606.ENSP00000357873	9606.ENSP00000450436	0.000	0.000	0.000	0.000	0.703	0.076	0.000	0.663	0.899
ACADSB	DBT	9606.ENSP00000357873	9606.ENSP00000359151	0.047	0.000	0.000	0.000	0.067	0.000	0.900	0.085	0.907
ACADSB	HADHA	9606.ENSP00000357873	9606.ENSP00000370023	0.049	0.000	0.000	0.000	0.156	0.259	0.900	0.529	0.966
ACAT1	HSD17B10	9606.ENSP00000265838	9606.ENSP00000168216	0.000	0.002	0.000	0.000	0.142	0.058	0.900	0.296	0.935
ACAT1	EHHADH	9606.ENSP00000265838	9606.ENSP00000231887	0.057	0.025	0.000	0.000	0.127	0.251	0.900	0.565	0.968
ACAT1	MLYCD	9606.ENSP00000265838	9606.ENSP00000262430	0.000	0.000	0.000	0.000	0.063	0.000	0.900	0.270	0.925
ACAT1	ACO1	9606.ENSP00000265838	9606.ENSP00000309477	0.000	0.000	0.000	0.000	0.097	0.609	0.000	0.250	0.712
ACAT1	CNDP2	9606.ENSP00000265838	9606.ENSP00000325548	0.041	0.000	0.000	0.000	0.136	0.726	0.000	0.075	0.761
ACAT1	PCCA	9606.ENSP00000265838	9606.ENSP00000365462	0.078	0.000	0.000	0.000	0.184	0.726	0.000	0.339	0.845
ACAT1	SUCLG2	9606.ENSP00000265838	9606.ENSP00000419325	0.048	0.000	0.000	0.000	0.173	0.000	0.800	0.208	0.858
ACAT1	ECHS1	9606.ENSP00000265838	9606.ENSP00000357535	0.057	0.000	0.000	0.000	0.295	0.609	0.000	0.583	0.877
ACAT1	ACAT2	9606.ENSP00000265838	9606.ENSP00000356015	0.000	0.000	0.448	0.902	0.098	0.457	0.800	0.906	0.906
ACAT1	HADH	9606.ENSP00000265838	9606.ENSP00000474560	0.093	0.013	0.264	0.000	0.468	0.368	0.000	0.670	0.912
ACAT1	ACOT12	9606.ENSP00000265838	9606.ENSP00000303246	0.073	0.000	0.000	0.000	0.062	0.000	0.900	0.114	0.912
ACAT1	ALDH6A1	9606.ENSP00000265838	9606.ENSP00000450436	0.000	0.000	0.000	0.000	0.266	0.000	0.900	0.153	0.932
ACAT1	HADHB	9606.ENSP00000265838	9606.ENSP00000325136	0.000	0.000	0.441	0.771	0.244	0.000	0.900	0.605	0.938
ACAT1	ACOX1	9606.ENSP00000265838	9606.ENSP00000293217	0.055	0.000	0.000	0.000	0.158	0.102	0.900	0.375	0.947
ACAT1	ACOX3	9606.ENSP00000265838	9606.ENSP00000348775	0.055	0.000	0.000	0.000	0.180	0.102	0.900	0.433	0.953
ACAT1	HMGCL	9606.ENSP00000265838	9606.ENSP00000363614	0.049	0.000	0.000	0.000	0.088	0.000	0.900	0.632	0.963
ACAT1	HMGCS2	9606.ENSP00000265838	9606.ENSP00000358414	0.093	0.000	0.000	0.000	0.186	0.345	0.900	0.729	0.984
ACAT1	HADHA	9606.ENSP00000265838	9606.ENSP00000370023	0.057	0.009	0.000	0.000	0.156	0.251	0.900	0.810	0.986
ACAT2	HSD17B10	9606.ENSP00000356015	9606.ENSP00000168216	0.000	0.002	0.000	0.000	0.149	0.056	0.900	0.107	0.918
ACAT2	EHHADH	9606.ENSP00000356015	9606.ENSP00000231887	0.057	0.056	0.000	0.000	0.127	0.251	0.900	0.574	0.969
ACAT2	MLYCD	9606.ENSP00000356015	9606.ENSP00000262430	0.000	0.000	0.000	0.000	0.062	0.000	0.900	0.078	0.905
ACAT2	ACOX1	9606.ENSP00000356015	9606.ENSP00000293217	0.055	0.000	0.000	0.000	0.158	0.102	0.900	0.369	0.946
ACAT2	ACOT12	9606.ENSP00000356015	9606.ENSP00000303246	0.073	0.000	0.000	0.000	0.063	0.000	0.900	0.167	0.918
ACAT2	HADHB	9606.ENSP00000356015	9606.ENSP00000325136	0.000	0.000	0.439	0.761	0.081	0.000	0.900	0.526	0.924
ACAT2	ACOX3	9606.ENSP00000356015	9606.ENSP00000348775	0.055	0.000	0.000	0.000	0.158	0.102	0.900	0.305	0.941
ACAT2	ECHS1	9606.ENSP00000356015	9606.ENSP00000357535	0.057	0.000	0.000	0.000	0.145	0.394	0.000	0.549	0.750
ACAT2	SUCLG2	9606.ENSP00000356015	9606.ENSP00000419325	0.048	0.000	0.000	0.000	0.076	0.000	0.800	0.143	0.829
ACAT2	HADH	9606.ENSP00000356015	9606.ENSP00000474560	0.093	0.036	0.261	0.000	0.351	0.520	0.000	0.539	0.886
ACAT2	ALDH6A1	9606.ENSP00000356015	9606.ENSP00000450436	0.000	0.000	0.000	0.000	0.266	0.000	0.900	0.058	0.924
ACAT2	HMGCL	9606.ENSP00000356015	9606.ENSP00000363614	0.049	0.000	0.000	0.000	0.088	0.000	0.900	0.397	0.940
ACAT2	HADHA	9606.ENSP00000356015	9606.ENSP00000370023	0.057	0.022	0.000	0.000	0.127	0.251	0.900	0.600	0.970
ACAT2	HMGCS2	9606.ENSP00000356015	9606.ENSP00000358414	0.093	0.000	0.000	0.000	0.186	0.345	0.900	0.619	0.978
ACO1	SDHA	9606.ENSP00000309477	9606.ENSP00000264932	0.075	0.000	0.000	0.000	0.241	0.259	0.000	0.519	0.716
ACO1	PCCA	9606.ENSP00000309477	9606.ENSP00000365462	0.000	0.000	0.000	0.000	0.063	0.726	0.000	0.058	0.737
ACO1	HAO1	9606.ENSP00000309477	9606.ENSP00000368066	0.000	0.000	0.000	0.000	0.084	0.000	0.000	0.737	0.749
ACO1	IDH2	9606.ENSP00000309477	9606.ENSP00000331897	0.135	0.000	0.000	0.000	0.123	0.056	0.900	0.502	0.957
ACOT12	ALDH2	9606.ENSP00000303246	9606.ENSP00000261733	0.000	0.000	0.000	0.000	0.062	0.057	0.900	0.059	0.905
ACOT12	MLYCD	9606.ENSP00000303246	9606.ENSP00000262430	0.000	0.000	0.000	0.000	0.062	0.103	0.800	0.076	0.823
ACOT12	SUCLG2	9606.ENSP00000303246	9606.ENSP00000419325	0.000	0.000	0.000	0.000	0.062	0.000	0.800	0.000	0.804
ACOT12	ALDH6A1	9606.ENSP00000303246	9606.ENSP00000450436	0.000	0.000	0.000	0.000	0.062	0.000	0.800	0.049	0.806
ACOT12	ACYP2	9606.ENSP00000303246	9606.ENSP00000378161	0.000	0.000	0.000	0.000	0.000	0.000	0.900	0.000	0.900
ACOT12	ALDH9A1	9606.ENSP00000303246	9606.ENSP00000346827	0.000	0.000	0.000	0.000	0.051	0.057	0.900	0.059	0.904
ACOT12	ALDH1B1	9606.ENSP00000303246	9606.ENSP00000366927	0.000	0.000	0.000	0.000	0.064	0.057	0.900	0.059	0.905
ACOT12	ALDH7A1	9606.ENSP00000303246	9606.ENSP00000387123	0.000	0.000	0.000	0.000	0.062	0.057	0.900	0.059	0.905
ACOT12	ALDH3A2	9606.ENSP00000303246	9606.ENSP00000345774	0.000	0.000	0.000	0.000	0.062	0.057	0.900	0.059	0.905
ACOX1	AGXT2	9606.ENSP00000293217	9606.ENSP00000231420	0.041	0.000	0.000	0.000	0.064	0.000	0.800	0.080	0.812
ACOX1	EHHADH	9606.ENSP00000293217	9606.ENSP00000231887	0.049	0.000	0.000	0.000	0.162	0.392	0.900	0.817	0.989
ACOX1	CAT	9606.ENSP00000293217	9606.ENSP00000241052	0.069	0.000	0.000	0.000	0.112	0.744	0.900	0.645	0.991
ACOX1	ALDH2	9606.ENSP00000293217	9606.ENSP00000261733	0.045	0.000	0.000	0.000	0.062	0.115	0.600	0.360	0.760
ACOX1	MLYCD	9606.ENSP00000293217	9606.ENSP00000262430	0.000	0.000	0.000	0.000	0.073	0.000	0.900	0.496	0.949
ACOX1	HIBADH	9606.ENSP00000293217	9606.ENSP00000265395	0.053	0.000	0.000	0.000	0.066	0.139	0.800	0.244	0.863
ACOX1	ALDH3A2	9606.ENSP00000293217	9606.ENSP00000345774	0.045	0.000	0.000	0.000	0.063	0.000	0.600	0.350	0.736
ACOX1	ALDH9A1	9606.ENSP00000293217	9606.ENSP00000346827	0.045	0.000	0.000	0.000	0.062	0.000	0.600	0.404	0.758
ACOX1	AOX1	9606.ENSP00000293217	9606.ENSP00000363832	0.000	0.000	0.000	0.000	0.063	0.000	0.800	0.408	0.879
ACOX1	DBT	9606.ENSP00000293217	9606.ENSP00000359151	0.047	0.000	0.000	0.000	0.063	0.000	0.900	0.085	0.907
ACOX1	PCCB	9606.ENSP00000293217	9606.ENSP00000419027	0.071	0.000	0.000	0.000	0.108	0.000	0.900	0.137	0.918
ACOX1	PCCA	9606.ENSP00000293217	9606.ENSP00000365462	0.071	0.000	0.000	0.000	0.105	0.067	0.900	0.186	0.925
ACOX1	ALDH6A1	9606.ENSP00000293217	9606.ENSP00000450436	0.000	0.000	0.000	0.000	0.146	0.076	0.900	0.164	0.925
ACOX1	ACOX3	9606.ENSP00000293217	9606.ENSP00000348775	0.000	0.000	0.415	0.765	0.076	0.000	0.900	0.863	0.930
ACOX1	AGXT	9606.ENSP00000293217	9606.ENSP00000302620	0.000	0.000	0.000	0.000	0.083	0.000	0.900	0.392	0.939
ACOX1	HAO1	9606.ENSP00000293217	9606.ENSP00000368066	0.045	0.000	0.000	0.000	0.085	0.000	0.900	0.391	0.939
ACOX1	HMGCL	9606.ENSP00000293217	9606.ENSP00000363614	0.050	0.000	0.000	0.000	0.065	0.000	0.900	0.447	0.944
ACOX1	ECHS1	9606.ENSP00000293217	9606.ENSP00000357535	0.049	0.000	0.000	0.000	0.122	0.246	0.900	0.401	0.955
ACOX1	HAO2	9606.ENSP00000293217	9606.ENSP00000483507	0.045	0.000	0.000	0.000	0.085	0.000	0.900	0.567	0.957
ACOX1	HADHB	9606.ENSP00000293217	9606.ENSP00000325136	0.055	0.000	0.000	0.000	0.158	0.102	0.900	0.519	0.959
ACOX1	HADHA	9606.ENSP00000293217	9606.ENSP00000370023	0.049	0.000	0.000	0.000	0.122	0.175	0.900	0.644	0.971
ACOX3	AGXT2	9606.ENSP00000348775	9606.ENSP00000231420	0.041	0.000	0.000	0.000	0.064	0.000	0.800	0.076	0.811
ACOX3	EHHADH	9606.ENSP00000348775	9606.ENSP00000231887	0.049	0.000	0.000	0.000	0.122	0.171	0.900	0.801	0.983
ACOX3	CAT	9606.ENSP00000348775	9606.ENSP00000241052	0.069	0.000	0.000	0.000	0.122	0.303	0.900	0.543	0.969
ACOX3	MLYCD	9606.ENSP00000348775	9606.ENSP00000262430	0.000	0.000	0.000	0.000	0.062	0.000	0.900	0.473	0.946
ACOX3	HIBADH	9606.ENSP00000348775	9606.ENSP00000265395	0.053	0.000	0.000	0.000	0.201	0.139	0.800	0.125	0.865
ACOX3	AGXT	9606.ENSP00000348775	9606.ENSP00000302620	0.000	0.000	0.000	0.000	0.063	0.000	0.900	0.526	0.951
ACOX3	HADHB	9606.ENSP00000348775	9606.ENSP00000325136	0.055	0.000	0.000	0.000	0.180	0.102	0.900	0.371	0.948
ACOX3	ALDH3A2	9606.ENSP00000348775	9606.ENSP00000345774	0.045	0.000	0.000	0.000	0.070	0.000	0.600	0.348	0.737
ACOX3	ALDH9A1	9606.ENSP00000348775	9606.ENSP00000346827	0.045	0.000	0.000	0.000	0.117	0.000	0.600	0.331	0.744
ACOX3	ALDH1B1	9606.ENSP00000348775	9606.ENSP00000366927	0.045	0.000	0.000	0.000	0.062	0.000	0.600	0.269	0.703
ACOX3	AOX1	9606.ENSP00000348775	9606.ENSP00000363832	0.000	0.000	0.000	0.000	0.064	0.000	0.800	0.162	0.829
ACOX3	PCCB	9606.ENSP00000348775	9606.ENSP00000419027	0.071	0.000	0.000	0.000	0.108	0.000	0.900	0.137	0.918
ACOX3	PCCA	9606.ENSP00000348775	9606.ENSP00000365462	0.071	0.000	0.000	0.000	0.105	0.067	0.900	0.126	0.919
ACOX3	ALDH6A1	9606.ENSP00000348775	9606.ENSP00000450436	0.000	0.000	0.000	0.000	0.146	0.076	0.900	0.111	0.920
ACOX3	DBT	9606.ENSP00000348775	9606.ENSP00000359151	0.047	0.000	0.000	0.000	0.210	0.000	0.900	0.085	0.921
ACOX3	ECHS1	9606.ENSP00000348775	9606.ENSP00000357535	0.049	0.000	0.000	0.000	0.122	0.171	0.900	0.299	0.942
ACOX3	HMGCL	9606.ENSP00000348775	9606.ENSP00000363614	0.050	0.000	0.000	0.000	0.068	0.000	0.900	0.481	0.948
ACOX3	HAO2	9606.ENSP00000348775	9606.ENSP00000483507	0.045	0.000	0.000	0.000	0.062	0.000	0.900	0.518	0.951
ACOX3	HAO1	9606.ENSP00000348775	9606.ENSP00000368066	0.045	0.000	0.000	0.000	0.064	0.000	0.900	0.542	0.953
ACOX3	HADHA	9606.ENSP00000348775	9606.ENSP00000370023	0.049	0.000	0.000	0.000	0.132	0.171	0.900	0.582	0.966
ACSF3	MCEE	9606.ENSP00000479130	9606.ENSP00000244217	0.049	0.000	0.000	0.000	0.062	0.000	0.900	0.375	0.936
ACSF3	ALDH2	9606.ENSP00000479130	9606.ENSP00000261733	0.051	0.001	0.000	0.000	0.062	0.151	0.900	0.138	0.922
ACSF3	MLYCD	9606.ENSP00000479130	9606.ENSP00000262430	0.000	0.201	0.000	0.000	0.101	0.000	0.800	0.562	0.928
ACSF3	MUT	9606.ENSP00000479130	9606.ENSP00000274813	0.000	0.000	0.000	0.000	0.062	0.000	0.900	0.239	0.922
ACSF3	UPB1	9606.ENSP00000479130	9606.ENSP00000324343	0.000	0.000	0.000	0.000	0.063	0.113	0.800	0.488	0.903
ACSF3	ALDH3A2	9606.ENSP00000479130	9606.ENSP00000345774	0.051	0.022	0.000	0.000	0.062	0.151	0.900	0.093	0.918
ACSF3	ALDH9A1	9606.ENSP00000479130	9606.ENSP00000346827	0.051	0.000	0.000	0.000	0.062	0.151	0.900	0.272	0.935
ACSF3	AOX1	9606.ENSP00000479130	9606.ENSP00000363832	0.000	0.000	0.000	0.000	0.062	0.000	0.900	0.162	0.914
ACSF3	ALDH1B1	9606.ENSP00000479130	9606.ENSP00000366927	0.051	0.000	0.000	0.000	0.062	0.151	0.900	0.138	0.922
ACSF3	ALDH7A1	9606.ENSP00000479130	9606.ENSP00000387123	0.051	0.000	0.000	0.000	0.062	0.414	0.900	0.111	0.945
ACSF3	MMAB	9606.ENSP00000479130	9606.ENSP00000445920	0.000	0.000	0.000	0.000	0.066	0.000	0.000	0.714	0.721
ACY1	OTC	9606.ENSP00000384296	9606.ENSP00000039007	0.114	0.000	0.000	0.000	0.055	0.000	0.900	0.460	0.948
ACY1	ASPA	9606.ENSP00000384296	9606.ENSP00000263080	0.000	0.000	0.000	0.000	0.066	0.000	0.000	0.920	0.922
ACY1	ARG1	9606.ENSP00000384296	9606.ENSP00000349446	0.000	0.000	0.000	0.000	0.055	0.000	0.900	0.192	0.916
ADH1A	UGT2B28	9606.ENSP00000209668	9606.ENSP00000334276	0.000	0.000	0.000	0.000	0.064	0.000	0.650	0.180	0.707
ADH1A	UGT1A8	9606.ENSP00000209668	9606.ENSP00000304845	0.000	0.000	0.000	0.000	0.063	0.000	0.650	0.208	0.717
ADH1A	UGT2B17	9606.ENSP00000209668	9606.ENSP00000320401	0.000	0.000	0.000	0.000	0.064	0.000	0.650	0.240	0.729
ADH1A	UGT1A6	9606.ENSP00000209668	9606.ENSP00000303174	0.000	0.000	0.000	0.000	0.063	0.000	0.650	0.261	0.736
ADH1A	ESD	9606.ENSP00000209668	9606.ENSP00000367992	0.119	0.103	0.413	0.000	0.237	0.167	0.000	0.321	0.753
ADH1A	ALDH7A1	9606.ENSP00000209668	9606.ENSP00000387123	0.049	0.000	0.000	0.000	0.062	0.000	0.650	0.338	0.765
ADH1A	ALDH3A2	9606.ENSP00000209668	9606.ENSP00000345774	0.049	0.000	0.000	0.000	0.062	0.000	0.650	0.495	0.821
ADH1A	ALDH9A1	9606.ENSP00000209668	9606.ENSP00000346827	0.049	0.000	0.000	0.000	0.063	0.000	0.650	0.497	0.822
ADH1A	ADH1C	9606.ENSP00000209668	9606.ENSP00000426083	0.000	0.000	0.449	0.985	0.182	0.000	0.800	0.859	0.832
ADH1A	ALDH1B1	9606.ENSP00000209668	9606.ENSP00000366927	0.049	0.000	0.000	0.000	0.063	0.000	0.650	0.535	0.835
ADH1A	ALDH2	9606.ENSP00000209668	9606.ENSP00000261733	0.049	0.000	0.000	0.000	0.135	0.000	0.650	0.734	0.913
ADH1A	AOX1	9606.ENSP00000209668	9606.ENSP00000363832	0.000	0.000	0.000	0.000	0.098	0.000	0.900	0.390	0.940
ADH1C	ALDH2	9606.ENSP00000426083	9606.ENSP00000261733	0.049	0.000	0.000	0.000	0.087	0.000	0.650	0.853	0.949
ADH1C	UGT1A6	9606.ENSP00000426083	9606.ENSP00000303174	0.000	0.000	0.000	0.000	0.097	0.000	0.650	0.139	0.704
ADH1C	UGT1A8	9606.ENSP00000426083	9606.ENSP00000304845	0.000	0.000	0.000	0.000	0.144	0.000	0.650	0.096	0.705
ADH1C	UGT2B17	9606.ENSP00000426083	9606.ENSP00000320401	0.000	0.000	0.000	0.000	0.160	0.000	0.650	0.112	0.716
ADH1C	ALDH3A2	9606.ENSP00000426083	9606.ENSP00000345774	0.049	0.000	0.000	0.000	0.062	0.000	0.650	0.524	0.831
ADH1C	ALDH9A1	9606.ENSP00000426083	9606.ENSP00000346827	0.049	0.000	0.000	0.000	0.063	0.000	0.650	0.497	0.822
ADH1C	AOX1	9606.ENSP00000426083	9606.ENSP00000363832	0.000	0.000	0.000	0.000	0.064	0.000	0.900	0.286	0.927
ADH1C	ALDH1B1	9606.ENSP00000426083	9606.ENSP00000366927	0.049	0.000	0.000	0.000	0.063	0.000	0.650	0.582	0.852
ADH1C	ESD	9606.ENSP00000426083	9606.ENSP00000367992	0.119	0.104	0.411	0.000	0.237	0.167	0.000	0.303	0.746
ADH1C	ALDH7A1	9606.ENSP00000426083	9606.ENSP00000387123	0.049	0.000	0.000	0.000	0.062	0.000	0.650	0.375	0.778
ADH4	ALDH2	9606.ENSP00000265512	9606.ENSP00000261733	0.049	0.000	0.000	0.000	0.063	0.000	0.650	0.863	0.951
ADH4	UGT2B10	9606.ENSP00000265512	9606.ENSP00000265403	0.000	0.000	0.000	0.000	0.151	0.000	0.650	0.165	0.730
ADH4	UGT1A8	9606.ENSP00000265512	9606.ENSP00000304845	0.000	0.000	0.000	0.000	0.063	0.000	0.650	0.166	0.702
ADH4	UGT2B11	9606.ENSP00000265512	9606.ENSP00000387683	0.000	0.000	0.000	0.000	0.145	0.000	0.650	0.113	0.711
ADH4	UGT2B7	9606.ENSP00000265512	9606.ENSP00000304811	0.000	0.000	0.000	0.000	0.186	0.000	0.650	0.096	0.720
ADH4	UGT2B17	9606.ENSP00000265512	9606.ENSP00000320401	0.000	0.000	0.000	0.000	0.112	0.000	0.650	0.174	0.721
ADH4	UGT2B4	9606.ENSP00000265512	9606.ENSP00000305221	0.000	0.000	0.000	0.000	0.130	0.000	0.650	0.181	0.729
ADH4	UGT2B28	9606.ENSP00000265512	9606.ENSP00000334276	0.000	0.000	0.000	0.000	0.112	0.000	0.650	0.206	0.731
ADH4	ESD	9606.ENSP00000265512	9606.ENSP00000367992	0.119	0.106	0.419	0.000	0.237	0.167	0.000	0.370	0.774
ADH4	ALDH7A1	9606.ENSP00000265512	9606.ENSP00000387123	0.049	0.000	0.000	0.000	0.062	0.000	0.650	0.365	0.775
ADH4	ALDH3A2	9606.ENSP00000265512	9606.ENSP00000345774	0.049	0.000	0.000	0.000	0.062	0.000	0.650	0.494	0.821
ADH4	ALDH9A1	9606.ENSP00000265512	9606.ENSP00000346827	0.049	0.000	0.000	0.000	0.063	0.000	0.650	0.530	0.834
ADH4	ALDH1B1	9606.ENSP00000265512	9606.ENSP00000366927	0.049	0.000	0.000	0.000	0.063	0.000	0.650	0.545	0.839
ADH4	AOX1	9606.ENSP00000265512	9606.ENSP00000363832	0.000	0.000	0.000	0.000	0.064	0.000	0.900	0.322	0.931
ADH6	ALDH2	9606.ENSP00000378359	9606.ENSP00000261733	0.049	0.000	0.000	0.000	0.063	0.000	0.650	0.678	0.886
ADH6	UGT2B10	9606.ENSP00000378359	9606.ENSP00000265403	0.000	0.000	0.000	0.000	0.161	0.000	0.650	0.109	0.715
ADH6	UGT1A6	9606.ENSP00000378359	9606.ENSP00000303174	0.000	0.000	0.000	0.000	0.091	0.000	0.650	0.187	0.719
ADH6	UGT1A8	9606.ENSP00000378359	9606.ENSP00000304845	0.000	0.000	0.000	0.000	0.083	0.000	0.650	0.171	0.710
ADH6	UGT2B4	9606.ENSP00000378359	9606.ENSP00000305221	0.000	0.000	0.000	0.000	0.064	0.000	0.650	0.225	0.724
ADH6	UGT2B17	9606.ENSP00000378359	9606.ENSP00000320401	0.000	0.000	0.000	0.000	0.084	0.000	0.650	0.156	0.706
ADH6	ALDH3A2	9606.ENSP00000378359	9606.ENSP00000345774	0.049	0.000	0.000	0.000	0.062	0.000	0.900	0.581	0.957
ADH6	ALDH9A1	9606.ENSP00000378359	9606.ENSP00000346827	0.049	0.000	0.000	0.000	0.063	0.000	0.650	0.583	0.852
ADH6	AOX1	9606.ENSP00000378359	9606.ENSP00000363832	0.000	0.000	0.000	0.000	0.064	0.000	0.900	0.269	0.925
ADH6	ALDH1B1	9606.ENSP00000378359	9606.ENSP00000366927	0.049	0.000	0.000	0.000	0.063	0.000	0.650	0.583	0.852
ADH6	ESD	9606.ENSP00000378359	9606.ENSP00000367992	0.119	0.101	0.414	0.000	0.237	0.167	0.000	0.364	0.768
ADH6	ALDH7A1	9606.ENSP00000378359	9606.ENSP00000387123	0.049	0.000	0.000	0.000	0.062	0.000	0.650	0.381	0.780
ADH6	UGT2B11	9606.ENSP00000378359	9606.ENSP00000387683	0.000	0.000	0.000	0.000	0.064	0.000	0.900	0.140	0.912
ADSL	PCK2	9606.ENSP00000485525	9606.ENSP00000216780	0.000	0.000	0.000	0.000	0.000	0.000	0.800	0.000	0.800
ADSL	ASL	9606.ENSP00000485525	9606.ENSP00000307188	0.161	0.000	0.000	0.000	0.064	0.000	0.900	0.633	0.967
ADSL	PCK1	9606.ENSP00000485525	9606.ENSP00000319814	0.000	0.000	0.000	0.000	0.000	0.000	0.800	0.000	0.800
ADSL	IDH2	9606.ENSP00000485525	9606.ENSP00000331897	0.167	0.000	0.000	0.000	0.066	0.000	0.800	0.149	0.849
ADSL	ADSSL1	9606.ENSP00000485525	9606.ENSP00000333019	0.167	0.000	0.000	0.000	0.467	0.725	0.900	0.816	0.997
ADSL	ENPP1	9606.ENSP00000485525	9606.ENSP00000354238	0.000	0.000	0.000	0.000	0.000	0.000	0.900	0.000	0.900
ADSL	ADSS	9606.ENSP00000485525	9606.ENSP00000355493	0.167	0.000	0.000	0.000	0.467	0.746	0.900	0.922	0.998
ADSL	ALDH18A1	9606.ENSP00000485525	9606.ENSP00000360268	0.350	0.000	0.000	0.000	0.135	0.000	0.000	0.554	0.727
ADSL	OGDHL	9606.ENSP00000485525	9606.ENSP00000363216	0.070	0.000	0.000	0.000	0.000	0.000	0.800	0.119	0.821
ADSL	AK3	9606.ENSP00000485525	9606.ENSP00000371230	0.042	0.000	0.000	0.000	0.103	0.056	0.900	0.316	0.934
ADSL	PC	9606.ENSP00000485525	9606.ENSP00000377532	0.000	0.000	0.000	0.000	0.000	0.000	0.800	0.572	0.910
ADSL	AK4	9606.ENSP00000485525	9606.ENSP00000378743	0.042	0.000	0.000	0.000	0.103	0.056	0.900	0.271	0.930
ADSS	ASNS	9606.ENSP00000355493	9606.ENSP00000175506	0.059	0.000	0.000	0.000	0.138	0.000	0.900	0.260	0.932
ADSS	GOT2	9606.ENSP00000355493	9606.ENSP00000245206	0.069	0.000	0.000	0.000	0.096	0.216	0.900	0.236	0.940
ADSS	ASPA	9606.ENSP00000355493	9606.ENSP00000263080	0.000	0.000	0.000	0.000	0.000	0.000	0.900	0.000	0.900
ADSS	CAD	9606.ENSP00000355493	9606.ENSP00000264705	0.109	0.000	0.246	0.000	0.108	0.000	0.900	0.502	0.964
ADSS	RPIA	9606.ENSP00000355493	9606.ENSP00000283646	0.000	0.000	0.000	0.000	0.072	0.726	0.000	0.145	0.763
ADSS	PGM2L1	9606.ENSP00000355493	9606.ENSP00000298198	0.133	0.000	0.000	0.000	0.065	0.609	0.000	0.189	0.708
ADSS	ADSSL1	9606.ENSP00000355493	9606.ENSP00000333019	0.000	0.000	0.448	0.973	0.000	0.273	0.800	0.746	0.853
ADSS	PHGDH	9606.ENSP00000355493	9606.ENSP00000358417	0.135	0.000	0.000	0.000	0.062	0.731	0.000	0.125	0.783
ADSS	ASPDH	9606.ENSP00000355493	9606.ENSP00000373860	0.000	0.000	0.000	0.000	0.000	0.000	0.800	0.000	0.800
ADSS	ESD	9606.ENSP00000355493	9606.ENSP00000367992	0.000	0.000	0.000	0.000	0.049	0.726	0.000	0.517	0.863
ADSS	ASRGL1	9606.ENSP00000355493	9606.ENSP00000400057	0.054	0.000	0.000	0.000	0.000	0.000	0.900	0.000	0.901
ADSS	GOT1	9606.ENSP00000355493	9606.ENSP00000359539	0.069	0.000	0.000	0.000	0.077	0.154	0.900	0.164	0.928
ADSS	ASS1	9606.ENSP00000355493	9606.ENSP00000361471	0.205	0.000	0.000	0.000	0.186	0.000	0.900	0.871	0.990
ADSSL1	ASNS	9606.ENSP00000333019	9606.ENSP00000175506	0.059	0.000	0.000	0.000	0.138	0.000	0.900	0.235	0.929
ADSSL1	GOT2	9606.ENSP00000333019	9606.ENSP00000245206	0.069	0.000	0.000	0.000	0.096	0.216	0.900	0.153	0.933
ADSSL1	ASPA	9606.ENSP00000333019	9606.ENSP00000263080	0.000	0.000	0.000	0.000	0.000	0.000	0.900	0.000	0.900
ADSSL1	CAD	9606.ENSP00000333019	9606.ENSP00000264705	0.109	0.000	0.243	0.000	0.108	0.000	0.900	0.484	0.963
ADSSL1	RPIA	9606.ENSP00000333019	9606.ENSP00000283646	0.000	0.000	0.000	0.000	0.072	0.726	0.000	0.060	0.740
ADSSL1	PGM2L1	9606.ENSP00000333019	9606.ENSP00000298198	0.133	0.000	0.000	0.000	0.065	0.609	0.000	0.189	0.708
ADSSL1	PHGDH	9606.ENSP00000333019	9606.ENSP00000358417	0.135	0.000	0.000	0.000	0.062	0.731	0.000	0.118	0.781
ADSSL1	ESD	9606.ENSP00000333019	9606.ENSP00000367992	0.000	0.000	0.000	0.000	0.049	0.726	0.000	0.253	0.788
ADSSL1	ASPDH	9606.ENSP00000333019	9606.ENSP00000373860	0.000	0.000	0.000	0.000	0.000	0.000	0.800	0.000	0.800
ADSSL1	ASRGL1	9606.ENSP00000333019	9606.ENSP00000400057	0.054	0.000	0.000	0.000	0.000	0.000	0.900	0.000	0.901
ADSSL1	GOT1	9606.ENSP00000333019	9606.ENSP00000359539	0.069	0.000	0.000	0.000	0.077	0.154	0.900	0.142	0.926
ADSSL1	ASS1	9606.ENSP00000333019	9606.ENSP00000361471	0.205	0.000	0.000	0.000	0.186	0.000	0.900	0.436	0.958
AGL	PYGM	9606.ENSP00000294724	9606.ENSP00000164139	0.185	0.000	0.000	0.000	0.653	0.000	0.900	0.783	0.993
AGL	PYGL	9606.ENSP00000294724	9606.ENSP00000216392	0.185	0.000	0.000	0.000	0.659	0.000	0.900	0.774	0.992
AGL	PYGB	9606.ENSP00000294724	9606.ENSP00000216962	0.185	0.000	0.000	0.000	0.660	0.000	0.900	0.749	0.992
AGL	GYS2	9606.ENSP00000294724	9606.ENSP00000261195	0.111	0.000	0.000	0.000	0.513	0.104	0.000	0.672	0.856
AGL	GRHPR	9606.ENSP00000294724	9606.ENSP00000313432	0.000	0.000	0.000	0.000	0.595	0.272	0.000	0.113	0.716
AGL	PGM1	9606.ENSP00000294724	9606.ENSP00000360124	0.000	0.000	0.000	0.000	0.456	0.000	0.000	0.518	0.727
AGL	PGM2L1	9606.ENSP00000294724	9606.ENSP00000298198	0.000	0.000	0.000	0.000	0.062	0.000	0.900	0.101	0.908
AGL	ENPP1	9606.ENSP00000294724	9606.ENSP00000354238	0.000	0.000	0.000	0.000	0.000	0.000	0.900	0.205	0.917
AGL	GYG2	9606.ENSP00000294724	9606.ENSP00000370555	0.000	0.000	0.000	0.000	0.086	0.000	0.900	0.431	0.943
AGL	UGP2	9606.ENSP00000294724	9606.ENSP00000338703	0.000	0.000	0.000	0.000	0.179	0.000	0.900	0.585	0.963
AGL	GYG1	9606.ENSP00000294724	9606.ENSP00000340736	0.000	0.000	0.000	0.000	0.086	0.000	0.900	0.692	0.969
AGXT	AGXT2	9606.ENSP00000302620	9606.ENSP00000231420	0.166	0.000	0.000	0.000	0.204	0.788	0.900	0.887	0.998
AGXT	EHHADH	9606.ENSP00000302620	9606.ENSP00000231887	0.052	0.000	0.000	0.000	0.067	0.000	0.900	0.604	0.960
AGXT	CAT	9606.ENSP00000302620	9606.ENSP00000241052	0.041	0.000	0.000	0.000	0.112	0.348	0.900	0.444	0.963
AGXT	GOT2	9606.ENSP00000302620	9606.ENSP00000245206	0.000	0.000	0.000	0.000	0.000	0.726	0.000	0.561	0.874
AGXT	SDS	9606.ENSP00000302620	9606.ENSP00000257549	0.147	0.000	0.000	0.000	0.096	0.057	0.900	0.396	0.948
AGXT	MLYCD	9606.ENSP00000302620	9606.ENSP00000262430	0.000	0.000	0.000	0.000	0.062	0.000	0.900	0.432	0.942
AGXT	AMT	9606.ENSP00000302620	9606.ENSP00000273588	0.048	0.000	0.000	0.000	0.115	0.000	0.900	0.705	0.971
AGXT	TKT	9606.ENSP00000302620	9606.ENSP00000391481	0.149	0.000	0.000	0.000	0.065	0.667	0.000	0.187	0.755
AGXT	PHGDH	9606.ENSP00000302620	9606.ENSP00000358417	0.185	0.427	0.000	0.000	0.065	0.000	0.000	0.517	0.761
AGXT	ALDH7A1	9606.ENSP00000302620	9606.ENSP00000387123	0.000	0.000	0.000	0.000	0.101	0.788	0.000	0.244	0.843
AGXT	HYI	9606.ENSP00000302620	9606.ENSP00000361502	0.050	0.000	0.000	0.000	0.063	0.000	0.900	0.000	0.903
AGXT	ALAS1	9606.ENSP00000302620	9606.ENSP00000378416	0.000	0.000	0.000	0.000	0.062	0.000	0.900	0.153	0.913
AGXT	CBSL	9606.ENSP00000302620	9606.ENSP00000381231	0.000	0.000	0.000	0.000	0.065	0.000	0.900	0.189	0.917
AGXT	SDSL	9606.ENSP00000302620	9606.ENSP00000385790	0.147	0.000	0.000	0.000	0.090	0.057	0.900	0.142	0.925
AGXT	GPT2	9606.ENSP00000302620	9606.ENSP00000345282	0.111	0.000	0.000	0.000	0.243	0.142	0.800	0.517	0.934
AGXT	GPT	9606.ENSP00000302620	9606.ENSP00000378408	0.111	0.000	0.000	0.000	0.243	0.142	0.800	0.524	0.935
AGXT	HMGCL	9606.ENSP00000302620	9606.ENSP00000363614	0.053	0.000	0.000	0.000	0.122	0.000	0.900	0.348	0.938
AGXT	GCSH	9606.ENSP00000302620	9606.ENSP00000319531	0.045	0.000	0.000	0.000	0.088	0.000	0.900	0.562	0.956
AGXT	GLDC	9606.ENSP00000302620	9606.ENSP00000370737	0.000	0.000	0.000	0.000	0.076	0.000	0.900	0.678	0.967
AGXT	SHMT2	9606.ENSP00000302620	9606.ENSP00000333667	0.187	0.000	0.000	0.000	0.064	0.244	0.900	0.610	0.973
AGXT	SHMT1	9606.ENSP00000302620	9606.ENSP00000318868	0.187	0.000	0.000	0.000	0.064	0.244	0.900	0.629	0.974
AGXT	HAO1	9606.ENSP00000302620	9606.ENSP00000368066	0.000	0.000	0.000	0.000	0.664	0.245	0.900	0.649	0.989
AGXT	HOGA1	9606.ENSP00000302620	9606.ENSP00000359680	0.078	0.000	0.000	0.000	0.269	0.000	0.900	0.861	0.989
AGXT	HAO2	9606.ENSP00000302620	9606.ENSP00000483507	0.000	0.000	0.000	0.000	0.669	0.245	0.900	0.612	0.989
AGXT	GRHPR	9606.ENSP00000302620	9606.ENSP00000313432	0.295	0.157	0.000	0.000	0.184	0.000	0.900	0.933	0.996
AGXT2	GCLC	9606.ENSP00000231420	9606.ENSP00000229416	0.000	0.000	0.000	0.000	0.065	0.000	0.900	0.000	0.902
AGXT2	KYNU	9606.ENSP00000231420	9606.ENSP00000264170	0.000	0.000	0.000	0.000	0.146	0.000	0.000	0.672	0.708
AGXT2	GOT2	9606.ENSP00000231420	9606.ENSP00000245206	0.000	0.000	0.000	0.000	0.062	0.726	0.000	0.200	0.776
AGXT2	HYI	9606.ENSP00000231420	9606.ENSP00000361502	0.000	0.000	0.000	0.000	0.063	0.000	0.800	0.000	0.804
AGXT2	PCCB	9606.ENSP00000231420	9606.ENSP00000419027	0.000	0.000	0.000	0.000	0.062	0.000	0.800	0.092	0.814
AGXT2	SDSL	9606.ENSP00000231420	9606.ENSP00000385790	0.000	0.000	0.000	0.000	0.065	0.000	0.800	0.109	0.818
AGXT2	BCKDHB	9606.ENSP00000231420	9606.ENSP00000318351	0.050	0.000	0.000	0.000	0.064	0.000	0.800	0.109	0.820
AGXT2	BCKDHA	9606.ENSP00000231420	9606.ENSP00000269980	0.056	0.000	0.000	0.000	0.061	0.000	0.800	0.119	0.822
AGXT2	HOGA1	9606.ENSP00000231420	9606.ENSP00000359680	0.000	0.000	0.000	0.000	0.086	0.000	0.800	0.109	0.823
AGXT2	DBT	9606.ENSP00000231420	9606.ENSP00000359151	0.000	0.000	0.000	0.000	0.063	0.000	0.800	0.138	0.824
AGXT2	SDS	9606.ENSP00000231420	9606.ENSP00000257549	0.000	0.000	0.000	0.000	0.082	0.000	0.800	0.154	0.831
AGXT2	PCCA	9606.ENSP00000231420	9606.ENSP00000365462	0.000	0.000	0.000	0.000	0.063	0.000	0.800	0.228	0.842
AGXT2	BCAT1	9606.ENSP00000231420	9606.ENSP00000443459	0.000	0.000	0.000	0.000	0.062	0.000	0.800	0.243	0.845
AGXT2	PHGDH	9606.ENSP00000231420	9606.ENSP00000358417	0.076	0.000	0.000	0.000	0.062	0.788	0.000	0.302	0.854
AGXT2	GRHPR	9606.ENSP00000231420	9606.ENSP00000313432	0.078	0.000	0.000	0.000	0.093	0.000	0.800	0.415	0.889
AGXT2	HAO1	9606.ENSP00000231420	9606.ENSP00000368066	0.000	0.000	0.000	0.000	0.265	0.000	0.800	0.313	0.890
AGXT2	HAO2	9606.ENSP00000231420	9606.ENSP00000483507	0.000	0.000	0.000	0.000	0.420	0.000	0.800	0.271	0.908
AGXT2	ALAS1	9606.ENSP00000231420	9606.ENSP00000378416	0.000	0.000	0.000	0.000	0.062	0.000	0.900	0.110	0.909
AGXT2	CTH	9606.ENSP00000231420	9606.ENSP00000359976	0.000	0.000	0.000	0.000	0.077	0.000	0.900	0.195	0.919
AGXT2	ALDH3A2	9606.ENSP00000231420	9606.ENSP00000345774	0.053	0.000	0.000	0.000	0.110	0.200	0.900	0.101	0.928
AGXT2	ALDH6A1	9606.ENSP00000231420	9606.ENSP00000450436	0.000	0.037	0.000	0.000	0.069	0.000	0.900	0.290	0.928
AGXT2	AOX1	9606.ENSP00000231420	9606.ENSP00000363832	0.000	0.000	0.000	0.000	0.065	0.000	0.900	0.304	0.929
AGXT2	UPB1	9606.ENSP00000231420	9606.ENSP00000324343	0.070	0.000	0.000	0.000	0.185	0.000	0.800	0.594	0.930
AGXT2	EHHADH	9606.ENSP00000231420	9606.ENSP00000231887	0.000	0.000	0.000	0.000	0.081	0.101	0.900	0.258	0.930
AGXT2	SHMT2	9606.ENSP00000231420	9606.ENSP00000333667	0.049	0.000	0.000	0.000	0.062	0.000	0.900	0.324	0.931
AGXT2	SHMT1	9606.ENSP00000231420	9606.ENSP00000318868	0.049	0.000	0.000	0.000	0.063	0.000	0.900	0.375	0.936
AGXT2	ALDH9A1	9606.ENSP00000231420	9606.ENSP00000346827	0.053	0.000	0.000	0.000	0.110	0.328	0.900	0.176	0.944
AGXT2	GPT	9606.ENSP00000231420	9606.ENSP00000378408	0.000	0.000	0.000	0.000	0.064	0.726	0.800	0.190	0.952
AGXT2	GPT2	9606.ENSP00000231420	9606.ENSP00000345282	0.000	0.000	0.000	0.000	0.062	0.726	0.800	0.217	0.954
AGXT2	HIBADH	9606.ENSP00000231420	9606.ENSP00000265395	0.000	0.000	0.000	0.000	0.062	0.000	0.900	0.557	0.954
AGXT2	ALDH1B1	9606.ENSP00000231420	9606.ENSP00000366927	0.053	0.002	0.000	0.000	0.110	0.562	0.900	0.101	0.960
AGXT2	ALDH2	9606.ENSP00000231420	9606.ENSP00000261733	0.053	0.002	0.000	0.000	0.110	0.562	0.900	0.178	0.964
AGXT2	GLDC	9606.ENSP00000231420	9606.ENSP00000370737	0.078	0.000	0.000	0.000	0.082	0.000	0.900	0.653	0.966
AGXT2	ALDH7A1	9606.ENSP00000231420	9606.ENSP00000387123	0.053	0.001	0.000	0.000	0.110	0.788	0.900	0.248	0.984
AK3	PKM	9606.ENSP00000371230	9606.ENSP00000320171	0.045	0.000	0.000	0.000	0.072	0.128	0.900	0.239	0.930
AK3	NME1	9606.ENSP00000371230	9606.ENSP00000337060	0.000	0.000	0.000	0.000	0.066	0.000	0.900	0.141	0.912
AK3	ENPP1	9606.ENSP00000371230	9606.ENSP00000354238	0.000	0.000	0.000	0.000	0.049	0.000	0.900	0.049	0.901
AK3	NME7	9606.ENSP00000371230	9606.ENSP00000356785	0.000	0.000	0.000	0.000	0.066	0.000	0.900	0.141	0.912
AK3	NME1-NME2	9606.ENSP00000371230	9606.ENSP00000376886	0.000	0.000	0.000	0.000	0.066	0.000	0.900	0.230	0.921
AK4	PKM	9606.ENSP00000378743	9606.ENSP00000320171	0.045	0.000	0.000	0.000	0.065	0.000	0.650	0.237	0.729
AK4	NME1	9606.ENSP00000378743	9606.ENSP00000337060	0.000	0.000	0.000	0.000	0.090	0.000	0.650	0.196	0.721
AK4	TPK1	9606.ENSP00000378743	9606.ENSP00000353165	0.000	0.000	0.000	0.000	0.062	0.000	0.900	0.048	0.902
AK4	NME7	9606.ENSP00000378743	9606.ENSP00000356785	0.000	0.000	0.000	0.000	0.066	0.000	0.650	0.201	0.716
AK4	NME1-NME2	9606.ENSP00000378743	9606.ENSP00000376886	0.000	0.000	0.000	0.000	0.066	0.000	0.650	0.258	0.736
AKR1A1	ALDH2	9606.ENSP00000361140	9606.ENSP00000261733	0.000	0.000	0.000	0.000	0.109	0.102	0.900	0.386	0.944
AKR1A1	CRYL1	9606.ENSP00000361140	9606.ENSP00000298248	0.000	0.000	0.000	0.000	0.062	0.000	0.900	0.177	0.916
AKR1A1	ALDH3A2	9606.ENSP00000361140	9606.ENSP00000345774	0.000	0.000	0.000	0.000	0.076	0.102	0.900	0.490	0.952
AKR1A1	ALDH9A1	9606.ENSP00000361140	9606.ENSP00000346827	0.000	0.000	0.000	0.000	0.148	0.102	0.900	0.475	0.954
AKR1A1	ALDH7A1	9606.ENSP00000361140	9606.ENSP00000387123	0.000	0.000	0.000	0.000	0.067	0.152	0.900	0.308	0.938
AKR1A1	ALDH1B1	9606.ENSP00000361140	9606.ENSP00000366927	0.000	0.000	0.000	0.000	0.109	0.102	0.900	0.386	0.944
AKR1B1	DHDH	9606.ENSP00000285930	9606.ENSP00000221403	0.059	0.000	0.000	0.000	0.110	0.000	0.900	0.434	0.946
AKR1B1	ALDH2	9606.ENSP00000285930	9606.ENSP00000261733	0.000	0.000	0.000	0.000	0.109	0.102	0.650	0.433	0.820
AKR1B1	SORD	9606.ENSP00000285930	9606.ENSP00000267814	0.085	0.000	0.000	0.000	0.099	0.494	0.900	0.905	0.995
AKR1B1	GALM	9606.ENSP00000285930	9606.ENSP00000272252	0.058	0.000	0.000	0.000	0.087	0.065	0.900	0.185	0.922
AKR1B1	ALDH9A1	9606.ENSP00000285930	9606.ENSP00000346827	0.000	0.000	0.000	0.000	0.109	0.102	0.650	0.224	0.753
AKR1B1	ENO3	9606.ENSP00000285930	9606.ENSP00000324105	0.000	0.000	0.000	0.000	0.082	0.697	0.000	0.223	0.765
AKR1B1	ALDH7A1	9606.ENSP00000285930	9606.ENSP00000387123	0.000	0.000	0.000	0.000	0.063	0.152	0.650	0.271	0.770
AKR1B1	ALDH3A2	9606.ENSP00000285930	9606.ENSP00000345774	0.000	0.000	0.000	0.000	0.073	0.102	0.650	0.380	0.795
AKR1B1	G6PC2	9606.ENSP00000285930	9606.ENSP00000364512	0.000	0.000	0.000	0.000	0.050	0.000	0.800	0.000	0.801
AKR1B1	ALDH1B1	9606.ENSP00000285930	9606.ENSP00000366927	0.000	0.000	0.000	0.000	0.109	0.102	0.650	0.388	0.805
AKR1B1	PAH	9606.ENSP00000285930	9606.ENSP00000448059	0.000	0.000	0.000	0.000	0.064	0.000	0.900	0.161	0.914
AKR1B1	DCXR	9606.ENSP00000285930	9606.ENSP00000303356	0.000	0.000	0.000	0.000	0.053	0.000	0.900	0.261	0.924
ALAD	ALAS1	9606.ENSP00000386284	9606.ENSP00000378416	0.111	0.000	0.000	0.000	0.063	0.000	0.900	0.845	0.985
ALAS1	SHMT1	9606.ENSP00000378416	9606.ENSP00000318868	0.075	0.000	0.000	0.000	0.062	0.000	0.900	0.278	0.928
ALAS1	SHMT2	9606.ENSP00000378416	9606.ENSP00000333667	0.075	0.000	0.000	0.000	0.062	0.000	0.900	0.394	0.940
ALAS1	GLDC	9606.ENSP00000378416	9606.ENSP00000370737	0.000	0.000	0.000	0.000	0.062	0.000	0.900	0.234	0.921
ALDH18A1	OTC	9606.ENSP00000360268	9606.ENSP00000039007	0.000	0.000	0.000	0.000	0.062	0.000	0.000	0.722	0.728
ALDH18A1	SDS	9606.ENSP00000360268	9606.ENSP00000257549	0.319	0.000	0.000	0.000	0.096	0.000	0.000	0.659	0.771
ALDH18A1	ALDH2	9606.ENSP00000360268	9606.ENSP00000261733	0.072	0.000	0.000	0.000	0.062	0.000	0.000	0.743	0.756
ALDH18A1	CAD	9606.ENSP00000360268	9606.ENSP00000264705	0.266	0.000	0.000	0.000	0.132	0.143	0.000	0.645	0.780
ALDH18A1	ASL	9606.ENSP00000360268	9606.ENSP00000307188	0.370	0.000	0.289	0.000	0.064	0.000	0.000	0.734	0.874
ALDH18A1	GLS2	9606.ENSP00000360268	9606.ENSP00000310447	0.069	0.000	0.000	0.000	0.000	0.000	0.800	0.250	0.848
ALDH18A1	ALDH5A1	9606.ENSP00000360268	9606.ENSP00000314649	0.072	0.000	0.000	0.000	0.060	0.000	0.000	0.801	0.811
ALDH18A1	GLS	9606.ENSP00000360268	9606.ENSP00000317379	0.069	0.000	0.000	0.000	0.000	0.000	0.800	0.223	0.842
ALDH18A1	SHMT1	9606.ENSP00000360268	9606.ENSP00000318868	0.205	0.000	0.000	0.000	0.063	0.000	0.000	0.670	0.732
ALDH18A1	SHMT2	9606.ENSP00000360268	9606.ENSP00000333667	0.205	0.000	0.000	0.000	0.229	0.000	0.000	0.664	0.776
ALDH18A1	PYCR2	9606.ENSP00000360268	9606.ENSP00000342502	0.347	0.000	0.297	0.000	0.335	0.368	0.000	0.888	0.974
ALDH18A1	ALDH9A1	9606.ENSP00000360268	9606.ENSP00000346827	0.072	0.000	0.000	0.000	0.063	0.000	0.000	0.811	0.821
ALDH18A1	BCAT1	9606.ENSP00000360268	9606.ENSP00000443459	0.330	0.000	0.000	0.000	0.062	0.102	0.000	0.548	0.711
ALDH18A1	CPS1	9606.ENSP00000360268	9606.ENSP00000402608	0.266	0.000	0.000	0.000	0.088	0.143	0.000	0.564	0.716
ALDH18A1	HMGCL	9606.ENSP00000360268	9606.ENSP00000363614	0.297	0.000	0.000	0.000	0.000	0.000	0.000	0.627	0.727
ALDH18A1	PC	9606.ENSP00000360268	9606.ENSP00000377532	0.220	0.000	0.000	0.000	0.131	0.000	0.000	0.635	0.731
ALDH18A1	SDSL	9606.ENSP00000360268	9606.ENSP00000385790	0.319	0.000	0.000	0.000	0.096	0.000	0.000	0.610	0.738
ALDH18A1	ALDH1B1	9606.ENSP00000360268	9606.ENSP00000366927	0.072	0.000	0.000	0.000	0.082	0.000	0.000	0.766	0.783
ALDH18A1	ALDH7A1	9606.ENSP00000360268	9606.ENSP00000387123	0.072	0.000	0.000	0.000	0.062	0.000	0.000	0.783	0.795
ALDH18A1	ALDH6A1	9606.ENSP00000360268	9606.ENSP00000450436	0.000	0.000	0.000	0.000	0.000	0.000	0.000	0.835	0.835
ALDH18A1	PSAT1	9606.ENSP00000360268	9606.ENSP00000365773	0.346	0.000	0.000	0.000	0.261	0.000	0.000	0.736	0.861
ALDH18A1	ASS1	9606.ENSP00000360268	9606.ENSP00000361471	0.384	0.000	0.252	0.000	0.101	0.000	0.000	0.802	0.907
ALDH18A1	PYCR1	9606.ENSP00000360268	9606.ENSP00000384949	0.347	0.000	0.297	0.000	0.351	0.368	0.000	0.941	0.987
ALDH18A1	ALDH4A1	9606.ENSP00000360268	9606.ENSP00000364490	0.072	0.000	0.000	0.000	0.060	0.000	0.900	0.926	0.992
ALDH1B1	EHHADH	9606.ENSP00000366927	9606.ENSP00000231887	0.042	0.000	0.000	0.000	0.063	0.070	0.900	0.266	0.927
ALDH1B1	ALDH2	9606.ENSP00000366927	9606.ENSP00000261733	0.000	0.000	0.449	0.976	0.062	0.128	0.800	0.794	0.827
ALDH1B1	HIBADH	9606.ENSP00000366927	9606.ENSP00000265395	0.068	0.000	0.000	0.000	0.185	0.666	0.900	0.179	0.975
ALDH1B1	UPB1	9606.ENSP00000366927	9606.ENSP00000324343	0.000	0.000	0.000	0.000	0.092	0.000	0.900	0.186	0.919
ALDH1B1	CNDP2	9606.ENSP00000366927	9606.ENSP00000325548	0.046	0.000	0.000	0.000	0.052	0.000	0.900	0.078	0.905
ALDH1B1	ALDH3A2	9606.ENSP00000366927	9606.ENSP00000345774	0.000	0.000	0.000	0.639	0.064	0.000	0.800	0.847	0.864
ALDH1B1	CNDP1	9606.ENSP00000366927	9606.ENSP00000351682	0.046	0.000	0.000	0.000	0.000	0.000	0.900	0.137	0.910
ALDH1B1	DBT	9606.ENSP00000366927	9606.ENSP00000359151	0.000	0.000	0.000	0.000	0.062	0.000	0.800	0.101	0.816
ALDH1B1	ALDH4A1	9606.ENSP00000366927	9606.ENSP00000364490	0.000	0.000	0.000	0.655	0.064	0.000	0.800	0.703	0.851
ALDH1B1	GLYCTK	9606.ENSP00000366927	9606.ENSP00000389175	0.000	0.000	0.000	0.000	0.062	0.000	0.900	0.077	0.905
ALDH1B1	ALDH6A1	9606.ENSP00000366927	9606.ENSP00000450436	0.000	0.000	0.344	0.760	0.158	0.201	0.900	0.680	0.943
ALDH2	EHHADH	9606.ENSP00000261733	9606.ENSP00000231887	0.042	0.000	0.000	0.000	0.064	0.070	0.900	0.304	0.931
ALDH2	CAT	9606.ENSP00000261733	9606.ENSP00000241052	0.000	0.000	0.000	0.000	0.126	0.369	0.900	0.578	0.973
ALDH2	DBT	9606.ENSP00000261733	9606.ENSP00000359151	0.000	0.000	0.000	0.000	0.062	0.000	0.800	0.101	0.816
ALDH2	ALDH4A1	9606.ENSP00000261733	9606.ENSP00000364490	0.000	0.000	0.000	0.650	0.065	0.000	0.800	0.686	0.850
ALDH2	ALDH3A2	9606.ENSP00000261733	9606.ENSP00000345774	0.000	0.000	0.000	0.632	0.064	0.000	0.800	0.809	0.862
ALDH2	GLYCTK	9606.ENSP00000261733	9606.ENSP00000389175	0.000	0.000	0.000	0.000	0.062	0.000	0.900	0.077	0.905
ALDH2	CNDP1	9606.ENSP00000261733	9606.ENSP00000351682	0.046	0.000	0.000	0.000	0.069	0.000	0.900	0.078	0.907
ALDH2	CNDP2	9606.ENSP00000261733	9606.ENSP00000325548	0.046	0.000	0.000	0.000	0.062	0.000	0.900	0.095	0.908
ALDH2	UPB1	9606.ENSP00000261733	9606.ENSP00000324343	0.000	0.000	0.000	0.000	0.092	0.000	0.900	0.231	0.924
ALDH2	ALDH6A1	9606.ENSP00000261733	9606.ENSP00000450436	0.000	0.000	0.344	0.741	0.188	0.428	0.900	0.680	0.961
ALDH2	HIBADH	9606.ENSP00000261733	9606.ENSP00000265395	0.068	0.000	0.000	0.000	0.185	0.561	0.900	0.276	0.971
ALDH3A2	EHHADH	9606.ENSP00000345774	9606.ENSP00000231887	0.042	0.000	0.000	0.000	0.064	0.070	0.900	0.522	0.952
ALDH3A2	CAT	9606.ENSP00000345774	9606.ENSP00000241052	0.000	0.000	0.000	0.000	0.079	0.172	0.900	0.288	0.938
ALDH3A2	HIBADH	9606.ENSP00000345774	9606.ENSP00000265395	0.068	0.000	0.000	0.000	0.093	0.184	0.900	0.113	0.927
ALDH3A2	UPB1	9606.ENSP00000345774	9606.ENSP00000324343	0.000	0.000	0.000	0.000	0.062	0.000	0.900	0.141	0.912
ALDH3A2	CNDP2	9606.ENSP00000345774	9606.ENSP00000325548	0.046	0.000	0.000	0.000	0.062	0.000	0.900	0.109	0.909
ALDH3A2	DBT	9606.ENSP00000345774	9606.ENSP00000359151	0.000	0.000	0.000	0.000	0.084	0.000	0.800	0.101	0.821
ALDH3A2	ALDH4A1	9606.ENSP00000345774	9606.ENSP00000364490	0.000	0.000	0.000	0.565	0.063	0.000	0.800	0.653	0.858
ALDH3A2	GLYCTK	9606.ENSP00000345774	9606.ENSP00000389175	0.000	0.000	0.000	0.000	0.062	0.000	0.900	0.051	0.903
ALDH3A2	CNDP1	9606.ENSP00000345774	9606.ENSP00000351682	0.046	0.000	0.000	0.000	0.000	0.000	0.900	0.078	0.904
ALDH3A2	ALDH6A1	9606.ENSP00000345774	9606.ENSP00000450436	0.000	0.000	0.000	0.593	0.072	0.201	0.900	0.670	0.940
ALDH4A1	GCLC	9606.ENSP00000364490	9606.ENSP00000229416	0.000	0.000	0.000	0.000	0.062	0.098	0.800	0.108	0.828
ALDH4A1	GOT2	9606.ENSP00000364490	9606.ENSP00000245206	0.000	0.000	0.000	0.000	0.064	0.155	0.900	0.290	0.936
ALDH4A1	ASPA	9606.ENSP00000364490	9606.ENSP00000263080	0.044	0.000	0.000	0.000	0.065	0.000	0.800	0.091	0.815
ALDH4A1	AMT	9606.ENSP00000364490	9606.ENSP00000273588	0.000	0.000	0.000	0.000	0.064	0.000	0.800	0.267	0.850
ALDH4A1	GLS2	9606.ENSP00000364490	9606.ENSP00000310447	0.000	0.000	0.000	0.000	0.086	0.000	0.900	0.496	0.950
ALDH4A1	GLS	9606.ENSP00000364490	9606.ENSP00000317379	0.000	0.000	0.000	0.000	0.065	0.000	0.900	0.214	0.920
ALDH4A1	GCSH	9606.ENSP00000364490	9606.ENSP00000319531	0.000	0.000	0.000	0.000	0.049	0.000	0.800	0.228	0.840
ALDH4A1	CNDP2	9606.ENSP00000364490	9606.ENSP00000325548	0.046	0.000	0.000	0.000	0.000	0.000	0.800	0.078	0.808
ALDH4A1	PYCR2	9606.ENSP00000364490	9606.ENSP00000342502	0.000	0.000	0.000	0.000	0.000	0.000	0.900	0.676	0.966
ALDH4A1	ALDH9A1	9606.ENSP00000364490	9606.ENSP00000346827	0.000	0.000	0.000	0.671	0.064	0.000	0.800	0.661	0.846
ALDH4A1	CNDP1	9606.ENSP00000364490	9606.ENSP00000351682	0.046	0.000	0.000	0.000	0.000	0.000	0.800	0.078	0.808
ALDH4A1	EPRS	9606.ENSP00000364490	9606.ENSP00000355890	0.047	0.000	0.000	0.000	0.070	0.000	0.800	0.107	0.820
ALDH4A1	GOT1	9606.ENSP00000364490	9606.ENSP00000359539	0.000	0.000	0.000	0.000	0.085	0.358	0.900	0.328	0.955
ALDH4A1	ALDH7A1	9606.ENSP00000364490	9606.ENSP00000387123	0.000	0.000	0.000	0.611	0.064	0.000	0.800	0.791	0.864
ALDH4A1	GLDC	9606.ENSP00000364490	9606.ENSP00000370737	0.000	0.000	0.000	0.000	0.064	0.058	0.800	0.407	0.881
ALDH4A1	PYCR1	9606.ENSP00000364490	9606.ENSP00000384949	0.000	0.000	0.000	0.000	0.065	0.000	0.900	0.799	0.979
ALDH5A1	PCK2	9606.ENSP00000314649	9606.ENSP00000216780	0.000	0.000	0.000	0.000	0.123	0.000	0.800	0.107	0.829
ALDH5A1	PCK1	9606.ENSP00000314649	9606.ENSP00000319814	0.000	0.000	0.000	0.000	0.062	0.000	0.800	0.075	0.811
ALDH5A1	OGDHL	9606.ENSP00000314649	9606.ENSP00000363216	0.000	0.000	0.000	0.000	0.089	0.000	0.800	0.107	0.823
ALDH5A1	IDH2	9606.ENSP00000314649	9606.ENSP00000331897	0.048	0.000	0.000	0.000	0.062	0.000	0.800	0.181	0.834
ALDH5A1	PC	9606.ENSP00000314649	9606.ENSP00000377532	0.000	0.000	0.000	0.000	0.073	0.000	0.800	0.327	0.864
ALDH6A1	EHHADH	9606.ENSP00000450436	9606.ENSP00000231887	0.000	0.000	0.000	0.000	0.125	0.140	0.900	0.377	0.946
ALDH6A1	GOT2	9606.ENSP00000450436	9606.ENSP00000245206	0.000	0.000	0.000	0.000	0.193	0.670	0.000	0.229	0.776
ALDH6A1	MLYCD	9606.ENSP00000450436	9606.ENSP00000262430	0.000	0.000	0.000	0.000	0.078	0.000	0.900	0.108	0.910
ALDH6A1	HIBADH	9606.ENSP00000450436	9606.ENSP00000265395	0.000	0.000	0.252	0.000	0.856	0.439	0.900	0.703	0.997
ALDH6A1	RPIA	9606.ENSP00000450436	9606.ENSP00000283646	0.000	0.000	0.000	0.000	0.000	0.789	0.000	0.314	0.849
ALDH6A1	PGM2L1	9606.ENSP00000450436	9606.ENSP00000298198	0.000	0.000	0.000	0.000	0.062	0.726	0.000	0.190	0.773
ALDH6A1	HADHB	9606.ENSP00000450436	9606.ENSP00000325136	0.000	0.000	0.000	0.000	0.176	0.000	0.900	0.098	0.919
ALDH6A1	MCCC2	9606.ENSP00000450436	9606.ENSP00000343657	0.000	0.000	0.000	0.000	0.367	0.358	0.000	0.328	0.703
ALDH6A1	GPT2	9606.ENSP00000450436	9606.ENSP00000345282	0.000	0.000	0.000	0.000	0.088	0.667	0.000	0.117	0.708
ALDH6A1	ALDH9A1	9606.ENSP00000450436	9606.ENSP00000346827	0.000	0.000	0.362	0.765	0.158	0.201	0.900	0.704	0.943
ALDH6A1	ECHS1	9606.ENSP00000450436	9606.ENSP00000357535	0.000	0.000	0.000	0.000	0.255	0.140	0.000	0.601	0.722
ALDH6A1	PHGDH	9606.ENSP00000450436	9606.ENSP00000358417	0.000	0.000	0.000	0.000	0.000	0.788	0.000	0.246	0.833
ALDH6A1	DBT	9606.ENSP00000450436	9606.ENSP00000359151	0.000	0.000	0.000	0.000	0.144	0.000	0.900	0.537	0.956
ALDH6A1	GOT1	9606.ENSP00000450436	9606.ENSP00000359539	0.000	0.000	0.000	0.000	0.109	0.760	0.000	0.143	0.800
ALDH6A1	PGM1	9606.ENSP00000450436	9606.ENSP00000360124	0.000	0.000	0.000	0.000	0.096	0.731	0.000	0.217	0.792
ALDH6A1	AOX1	9606.ENSP00000450436	9606.ENSP00000363832	0.000	0.000	0.000	0.000	0.089	0.000	0.900	0.211	0.921
ALDH6A1	PCCA	9606.ENSP00000450436	9606.ENSP00000365462	0.000	0.000	0.000	0.000	0.145	0.000	0.900	0.559	0.959
ALDH6A1	ALDH7A1	9606.ENSP00000450436	9606.ENSP00000387123	0.000	0.000	0.000	0.666	0.091	0.788	0.900	0.765	0.984
ALDH6A1	TKT	9606.ENSP00000450436	9606.ENSP00000391481	0.000	0.000	0.000	0.000	0.071	0.728	0.000	0.147	0.765
ALDH6A1	PCCB	9606.ENSP00000450436	9606.ENSP00000419027	0.000	0.000	0.000	0.000	0.288	0.245	0.900	0.525	0.971
ALDH6A1	HADH	9606.ENSP00000450436	9606.ENSP00000474560	0.000	0.006	0.000	0.000	0.668	0.000	0.000	0.248	0.740
ALDH7A1	EHHADH	9606.ENSP00000387123	9606.ENSP00000231887	0.042	0.000	0.000	0.000	0.063	0.070	0.900	0.189	0.919
ALDH7A1	CAT	9606.ENSP00000387123	9606.ENSP00000241052	0.000	0.000	0.000	0.000	0.079	0.767	0.000	0.358	0.850
ALDH7A1	GOT2	9606.ENSP00000387123	9606.ENSP00000245206	0.000	0.000	0.000	0.000	0.168	0.726	0.000	0.163	0.792
ALDH7A1	HIBADH	9606.ENSP00000387123	9606.ENSP00000265395	0.068	0.000	0.000	0.000	0.084	0.184	0.900	0.256	0.938
ALDH7A1	SORD	9606.ENSP00000387123	9606.ENSP00000267814	0.074	0.000	0.000	0.000	0.066	0.679	0.000	0.205	0.749
ALDH7A1	UPB1	9606.ENSP00000387123	9606.ENSP00000324343	0.000	0.000	0.000	0.000	0.066	0.000	0.900	0.082	0.906
ALDH7A1	CNDP2	9606.ENSP00000387123	9606.ENSP00000325548	0.046	0.000	0.000	0.000	0.062	0.000	0.900	0.078	0.906
ALDH7A1	NME1	9606.ENSP00000387123	9606.ENSP00000337060	0.000	0.000	0.000	0.000	0.062	0.673	0.000	0.267	0.755
ALDH7A1	GPT2	9606.ENSP00000387123	9606.ENSP00000345282	0.000	0.000	0.000	0.000	0.063	0.726	0.000	0.097	0.748
ALDH7A1	CNDP1	9606.ENSP00000387123	9606.ENSP00000351682	0.046	0.000	0.000	0.000	0.062	0.000	0.900	0.078	0.906
ALDH7A1	PHGDH	9606.ENSP00000387123	9606.ENSP00000358417	0.045	0.000	0.000	0.000	0.083	0.788	0.000	0.232	0.838
ALDH7A1	DBT	9606.ENSP00000387123	9606.ENSP00000359151	0.000	0.000	0.000	0.000	0.167	0.000	0.800	0.101	0.837
ALDH7A1	PCCA	9606.ENSP00000387123	9606.ENSP00000365462	0.000	0.000	0.000	0.000	0.112	0.000	0.600	0.282	0.722
ALDH7A1	NME1-NME2	9606.ENSP00000387123	9606.ENSP00000376886	0.000	0.000	0.000	0.000	0.062	0.673	0.000	0.133	0.710
ALDH7A1	GPT	9606.ENSP00000387123	9606.ENSP00000378408	0.000	0.000	0.000	0.000	0.063	0.726	0.000	0.163	0.766
ALDH7A1	TKT	9606.ENSP00000387123	9606.ENSP00000391481	0.000	0.000	0.000	0.000	0.065	0.726	0.000	0.169	0.768
ALDH7A1	GLYCTK	9606.ENSP00000387123	9606.ENSP00000389175	0.000	0.000	0.000	0.000	0.062	0.000	0.900	0.145	0.912
ALDH9A1	EHHADH	9606.ENSP00000346827	9606.ENSP00000231887	0.042	0.000	0.000	0.000	0.064	0.070	0.900	0.424	0.943
ALDH9A1	HIBADH	9606.ENSP00000346827	9606.ENSP00000265395	0.068	0.000	0.000	0.000	0.284	0.326	0.900	0.174	0.956
ALDH9A1	GLS2	9606.ENSP00000346827	9606.ENSP00000310447	0.000	0.000	0.000	0.000	0.062	0.000	0.600	0.347	0.733
ALDH9A1	UPB1	9606.ENSP00000346827	9606.ENSP00000324343	0.000	0.000	0.000	0.000	0.108	0.000	0.900	0.264	0.928
ALDH9A1	CNDP2	9606.ENSP00000346827	9606.ENSP00000325548	0.046	0.000	0.000	0.000	0.063	0.000	0.900	0.338	0.933
ALDH9A1	DBT	9606.ENSP00000346827	9606.ENSP00000359151	0.000	0.000	0.000	0.000	0.162	0.000	0.800	0.101	0.836
ALDH9A1	CNDP1	9606.ENSP00000346827	9606.ENSP00000351682	0.046	0.000	0.000	0.000	0.000	0.000	0.900	0.078	0.904
ALDH9A1	GLYCTK	9606.ENSP00000346827	9606.ENSP00000389175	0.000	0.000	0.000	0.000	0.063	0.000	0.900	0.078	0.906
ALDOA	ALDOC	9606.ENSP00000378669	9606.ENSP00000226253	0.000	0.000	0.449	0.981	0.111	0.882	0.800	0.903	0.977
ALDOA	GAPDH	9606.ENSP00000378669	9606.ENSP00000229239	0.111	0.000	0.000	0.000	0.746	0.682	0.900	0.721	0.997
ALDOA	PKM	9606.ENSP00000378669	9606.ENSP00000320171	0.125	0.002	0.000	0.000	0.365	0.272	0.800	0.739	0.975
ALDOA	ENO3	9606.ENSP00000378669	9606.ENSP00000324105	0.000	0.000	0.000	0.000	0.221	0.239	0.600	0.693	0.917
ALDOA	PGK1	9606.ENSP00000378669	9606.ENSP00000362413	0.135	0.000	0.000	0.000	0.246	0.655	0.000	0.789	0.946
ALDOA	ALDOB	9606.ENSP00000378669	9606.ENSP00000363988	0.000	0.000	0.449	0.973	0.000	0.111	0.800	0.861	0.820
ALDOA	G6PC2	9606.ENSP00000378669	9606.ENSP00000364512	0.000	0.000	0.000	0.000	0.062	0.000	0.800	0.135	0.823
ALDOA	BPGM	9606.ENSP00000378669	9606.ENSP00000376840	0.073	0.000	0.000	0.000	0.124	0.069	0.600	0.539	0.835
ALDOA	DAK	9606.ENSP00000378669	9606.ENSP00000378360	0.000	0.000	0.000	0.000	0.062	0.000	0.900	0.233	0.921
ALDOA	GLYCTK	9606.ENSP00000378669	9606.ENSP00000389175	0.000	0.000	0.000	0.000	0.062	0.000	0.800	0.215	0.840
ALDOA	FBP1	9606.ENSP00000378669	9606.ENSP00000408025	0.000	0.000	0.000	0.000	0.139	0.181	0.900	0.638	0.971
ALDOA	TKT	9606.ENSP00000378669	9606.ENSP00000391481	0.111	0.000	0.000	0.000	0.129	0.404	0.900	0.535	0.974
ALDOB	ALDOC	9606.ENSP00000363988	9606.ENSP00000226253	0.000	0.000	0.449	0.974	0.000	0.000	0.800	0.813	0.806
ALDOB	GAPDH	9606.ENSP00000363988	9606.ENSP00000229239	0.111	0.000	0.000	0.000	0.185	0.213	0.900	0.545	0.969
ALDOB	PKM	9606.ENSP00000363988	9606.ENSP00000320171	0.125	0.002	0.000	0.000	0.202	0.000	0.800	0.587	0.934
ALDOB	ENO3	9606.ENSP00000363988	9606.ENSP00000324105	0.000	0.000	0.000	0.000	0.221	0.212	0.600	0.556	0.876
ALDOB	PGK1	9606.ENSP00000363988	9606.ENSP00000362413	0.135	0.000	0.000	0.000	0.168	0.348	0.000	0.610	0.792
ALDOB	BPGM	9606.ENSP00000363988	9606.ENSP00000376840	0.073	0.000	0.000	0.000	0.124	0.069	0.600	0.431	0.796
ALDOB	G6PC2	9606.ENSP00000363988	9606.ENSP00000364512	0.000	0.000	0.000	0.000	0.080	0.000	0.800	0.277	0.855
ALDOB	GLYCTK	9606.ENSP00000363988	9606.ENSP00000389175	0.000	0.000	0.000	0.000	0.090	0.000	0.800	0.275	0.856
ALDOB	TKT	9606.ENSP00000363988	9606.ENSP00000391481	0.111	0.000	0.000	0.000	0.065	0.216	0.900	0.427	0.955
ALDOB	DAK	9606.ENSP00000363988	9606.ENSP00000378360	0.000	0.000	0.000	0.000	0.073	0.000	0.900	0.598	0.959
ALDOB	FBP1	9606.ENSP00000363988	9606.ENSP00000408025	0.000	0.000	0.000	0.000	0.182	0.181	0.900	0.679	0.975
ALDOC	BPGM	9606.ENSP00000226253	9606.ENSP00000376840	0.073	0.000	0.000	0.000	0.124	0.069	0.600	0.331	0.761
ALDOC	G6PC2	9606.ENSP00000226253	9606.ENSP00000364512	0.000	0.000	0.000	0.000	0.062	0.000	0.800	0.121	0.820
ALDOC	GLYCTK	9606.ENSP00000226253	9606.ENSP00000389175	0.000	0.000	0.000	0.000	0.062	0.000	0.800	0.213	0.839
ALDOC	PGK1	9606.ENSP00000226253	9606.ENSP00000362413	0.135	0.000	0.000	0.000	0.191	0.505	0.000	0.710	0.886
ALDOC	ENO3	9606.ENSP00000226253	9606.ENSP00000324105	0.000	0.000	0.000	0.000	0.221	0.212	0.600	0.630	0.897
ALDOC	DAK	9606.ENSP00000226253	9606.ENSP00000378360	0.000	0.000	0.000	0.000	0.062	0.000	0.900	0.214	0.919
ALDOC	PKM	9606.ENSP00000226253	9606.ENSP00000320171	0.125	0.002	0.000	0.000	0.202	0.128	0.800	0.633	0.947
ALDOC	TKT	9606.ENSP00000226253	9606.ENSP00000391481	0.111	0.000	0.000	0.000	0.065	0.216	0.900	0.392	0.953
ALDOC	FBP1	9606.ENSP00000226253	9606.ENSP00000408025	0.000	0.000	0.000	0.000	0.124	0.181	0.900	0.601	0.967
ALDOC	GAPDH	9606.ENSP00000226253	9606.ENSP00000229239	0.111	0.000	0.000	0.000	0.205	0.213	0.900	0.554	0.970
ALPL	TPK1	9606.ENSP00000363973	9606.ENSP00000353165	0.000	0.000	0.000	0.000	0.053	0.000	0.900	0.082	0.905
ALPL	ENPP1	9606.ENSP00000363973	9606.ENSP00000354238	0.045	0.000	0.000	0.000	0.062	0.000	0.900	0.687	0.968
ALPL	GCH1	9606.ENSP00000363973	9606.ENSP00000419045	0.000	0.000	0.000	0.000	0.000	0.000	0.900	0.000	0.900
AMT	MTHFD1	9606.ENSP00000273588	9606.ENSP00000216605	0.111	0.000	0.000	0.000	0.112	0.244	0.900	0.634	0.974
AMT	GLS	9606.ENSP00000273588	9606.ENSP00000317379	0.109	0.000	0.000	0.000	0.052	0.000	0.800	0.081	0.823
AMT	GLS2	9606.ENSP00000273588	9606.ENSP00000310447	0.109	0.000	0.000	0.000	0.062	0.000	0.800	0.201	0.848
AMT	MTR	9606.ENSP00000273588	9606.ENSP00000355536	0.053	0.000	0.000	0.000	0.063	0.000	0.900	0.455	0.945
AMT	MTHFD1L	9606.ENSP00000273588	9606.ENSP00000478253	0.111	0.000	0.000	0.000	0.112	0.244	0.900	0.606	0.972
AMT	SHMT1	9606.ENSP00000273588	9606.ENSP00000318868	0.111	0.020	0.000	0.000	0.481	0.711	0.900	0.785	0.996
AMT	SHMT2	9606.ENSP00000273588	9606.ENSP00000333667	0.111	0.000	0.000	0.000	0.481	0.711	0.900	0.808	0.996
AMT	GLDC	9606.ENSP00000273588	9606.ENSP00000370737	0.167	0.788	0.378	0.000	0.844	0.382	0.900	0.954	0.999
AMT	GCSH	9606.ENSP00000273588	9606.ENSP00000319531	0.167	0.000	0.419	0.000	0.825	0.261	0.900	0.982	0.999
AOX1	EHHADH	9606.ENSP00000363832	9606.ENSP00000231887	0.000	0.000	0.000	0.000	0.062	0.000	0.900	0.175	0.915
AOX1	HIBADH	9606.ENSP00000363832	9606.ENSP00000265395	0.000	0.000	0.000	0.000	0.000	0.000	0.900	0.087	0.904
AOX1	UGT2B10	9606.ENSP00000363832	9606.ENSP00000265403	0.000	0.000	0.000	0.000	0.098	0.000	0.650	0.351	0.777
AOX1	UGT1A6	9606.ENSP00000363832	9606.ENSP00000303174	0.000	0.000	0.000	0.000	0.078	0.000	0.650	0.231	0.730
AOX1	UGT2B7	9606.ENSP00000363832	9606.ENSP00000304811	0.000	0.000	0.000	0.000	0.078	0.000	0.650	0.238	0.732
AOX1	UGT1A8	9606.ENSP00000363832	9606.ENSP00000304845	0.000	0.000	0.000	0.000	0.078	0.000	0.650	0.450	0.807
AOX1	UGT2B17	9606.ENSP00000363832	9606.ENSP00000320401	0.000	0.000	0.000	0.000	0.078	0.000	0.650	0.176	0.710
AOX1	UPB1	9606.ENSP00000363832	9606.ENSP00000324343	0.000	0.000	0.000	0.000	0.128	0.000	0.800	0.342	0.875
AOX1	UGT2B28	9606.ENSP00000363832	9606.ENSP00000334276	0.000	0.000	0.000	0.000	0.078	0.000	0.650	0.221	0.727
AOX1	DBT	9606.ENSP00000363832	9606.ENSP00000359151	0.000	0.000	0.000	0.000	0.063	0.000	0.800	0.055	0.807
AOX1	GPHN	9606.ENSP00000363832	9606.ENSP00000417901	0.000	0.000	0.000	0.000	0.055	0.000	0.000	0.775	0.778
AOX1	PCCB	9606.ENSP00000363832	9606.ENSP00000419027	0.048	0.000	0.000	0.000	0.066	0.000	0.800	0.179	0.834
AOX1	PCCA	9606.ENSP00000363832	9606.ENSP00000365462	0.000	0.000	0.000	0.000	0.068	0.000	0.800	0.348	0.867
AOX1	PHOSPHO2	9606.ENSP00000363832	9606.ENSP00000481046	0.000	0.000	0.000	0.000	0.000	0.000	0.900	0.000	0.900
AOX1	DHRS3	9606.ENSP00000363832	9606.ENSP00000480439	0.000	0.000	0.000	0.000	0.062	0.000	0.900	0.067	0.904
AOX1	RDH12	9606.ENSP00000363832	9606.ENSP00000449079	0.000	0.000	0.000	0.000	0.000	0.000	0.900	0.137	0.910
AOX1	HSD17B6	9606.ENSP00000363832	9606.ENSP00000451406	0.000	0.000	0.000	0.000	0.062	0.000	0.900	0.272	0.925
ARG1	OTC	9606.ENSP00000349446	9606.ENSP00000039007	0.000	0.000	0.000	0.000	0.084	0.119	0.900	0.845	0.985
ARG1	ASL	9606.ENSP00000349446	9606.ENSP00000307188	0.000	0.000	0.000	0.000	0.062	0.000	0.900	0.789	0.978
ARG1	ASS1	9606.ENSP00000349446	9606.ENSP00000361471	0.000	0.000	0.000	0.000	0.076	0.000	0.000	0.838	0.844
ASL	OTC	9606.ENSP00000307188	9606.ENSP00000039007	0.218	0.000	0.291	0.000	0.651	0.000	0.000	0.905	0.979
ASL	PCK2	9606.ENSP00000307188	9606.ENSP00000216780	0.000	0.000	0.000	0.000	0.090	0.000	0.800	0.190	0.839
ASL	SDHA	9606.ENSP00000307188	9606.ENSP00000264932	0.000	0.000	0.000	0.000	0.062	0.000	0.800	0.175	0.831
ASL	HADH	9606.ENSP00000307188	9606.ENSP00000474560	0.000	0.000	0.000	0.000	0.064	0.000	0.000	0.783	0.788
ASL	OGDHL	9606.ENSP00000307188	9606.ENSP00000363216	0.000	0.000	0.000	0.000	0.062	0.000	0.800	0.058	0.807
ASL	IDH2	9606.ENSP00000307188	9606.ENSP00000331897	0.042	0.000	0.000	0.000	0.063	0.000	0.800	0.182	0.833
ASL	CPS1	9606.ENSP00000307188	9606.ENSP00000402608	0.135	0.000	0.000	0.000	0.344	0.000	0.000	0.752	0.847
ASL	PCK1	9606.ENSP00000307188	9606.ENSP00000319814	0.000	0.000	0.000	0.000	0.063	0.000	0.800	0.256	0.848
ASL	PC	9606.ENSP00000307188	9606.ENSP00000377532	0.000	0.000	0.000	0.000	0.062	0.000	0.800	0.369	0.871
ASL	ASS1	9606.ENSP00000307188	9606.ENSP00000361471	0.219	0.000	0.439	0.000	0.798	0.000	0.900	0.976	0.999
ASNS	ASPDH	9606.ENSP00000175506	9606.ENSP00000373860	0.000	0.000	0.000	0.000	0.000	0.000	0.800	0.000	0.800
ASNS	PSAT1	9606.ENSP00000175506	9606.ENSP00000365773	0.000	0.000	0.000	0.000	0.334	0.000	0.000	0.743	0.821
ASNS	PHGDH	9606.ENSP00000175506	9606.ENSP00000358417	0.000	0.000	0.000	0.000	0.296	0.272	0.000	0.682	0.823
ASNS	ASRGL1	9606.ENSP00000175506	9606.ENSP00000400057	0.000	0.000	0.000	0.000	0.000	0.000	0.800	0.327	0.859
ASNS	EPRS	9606.ENSP00000175506	9606.ENSP00000355890	0.044	0.000	0.000	0.000	0.220	0.748	0.000	0.407	0.873
ASNS	ASPA	9606.ENSP00000175506	9606.ENSP00000263080	0.000	0.000	0.000	0.000	0.000	0.000	0.900	0.135	0.909
ASNS	GOT1	9606.ENSP00000175506	9606.ENSP00000359539	0.000	0.000	0.000	0.000	0.191	0.000	0.900	0.393	0.946
ASNS	CAD	9606.ENSP00000175506	9606.ENSP00000264705	0.126	0.000	0.000	0.000	0.146	0.000	0.900	0.493	0.957
ASNS	GOT2	9606.ENSP00000175506	9606.ENSP00000245206	0.000	0.000	0.000	0.000	0.084	0.000	0.900	0.615	0.961
ASNS	ASS1	9606.ENSP00000175506	9606.ENSP00000361471	0.044	0.000	0.000	0.000	0.651	0.272	0.900	0.675	0.990
ASPA	GOT2	9606.ENSP00000263080	9606.ENSP00000245206	0.000	0.000	0.000	0.000	0.000	0.000	0.900	0.162	0.912
ASPA	FOLH1	9606.ENSP00000263080	9606.ENSP00000256999	0.000	0.000	0.000	0.000	0.088	0.000	0.900	0.541	0.954
ASPA	GLS2	9606.ENSP00000263080	9606.ENSP00000310447	0.000	0.000	0.000	0.000	0.000	0.000	0.800	0.000	0.800
ASPA	GLS	9606.ENSP00000263080	9606.ENSP00000317379	0.000	0.000	0.000	0.000	0.000	0.000	0.800	0.000	0.800
ASPA	ASPDH	9606.ENSP00000263080	9606.ENSP00000373860	0.000	0.000	0.000	0.000	0.062	0.000	0.800	0.000	0.804
ASPA	CAD	9606.ENSP00000263080	9606.ENSP00000264705	0.000	0.000	0.000	0.000	0.000	0.000	0.900	0.000	0.900
ASPA	ASRGL1	9606.ENSP00000263080	9606.ENSP00000400057	0.000	0.000	0.000	0.000	0.062	0.000	0.900	0.000	0.902
ASPA	ASS1	9606.ENSP00000263080	9606.ENSP00000361471	0.000	0.000	0.000	0.000	0.062	0.000	0.900	0.096	0.907
ASPA	GOT1	9606.ENSP00000263080	9606.ENSP00000359539	0.000	0.000	0.000	0.000	0.000	0.000	0.900	0.208	0.917
ASPDH	GOT2	9606.ENSP00000373860	9606.ENSP00000245206	0.000	0.000	0.000	0.000	0.000	0.000	0.800	0.000	0.800
ASPDH	CAD	9606.ENSP00000373860	9606.ENSP00000264705	0.000	0.000	0.000	0.000	0.064	0.000	0.800	0.000	0.804
ASPDH	GOT1	9606.ENSP00000373860	9606.ENSP00000359539	0.000	0.000	0.000	0.000	0.049	0.000	0.800	0.000	0.801
ASPDH	ASS1	9606.ENSP00000373860	9606.ENSP00000361471	0.000	0.000	0.000	0.000	0.065	0.000	0.800	0.000	0.805
ASPDH	ASRGL1	9606.ENSP00000373860	9606.ENSP00000400057	0.000	0.000	0.000	0.000	0.062	0.000	0.800	0.000	0.804
ASRGL1	GOT2	9606.ENSP00000400057	9606.ENSP00000245206	0.000	0.000	0.000	0.000	0.000	0.000	0.900	0.067	0.902
ASRGL1	CAD	9606.ENSP00000400057	9606.ENSP00000264705	0.045	0.000	0.000	0.000	0.000	0.000	0.900	0.135	0.910
ASRGL1	GOT1	9606.ENSP00000400057	9606.ENSP00000359539	0.000	0.000	0.000	0.000	0.062	0.000	0.900	0.000	0.902
ASRGL1	ASS1	9606.ENSP00000400057	9606.ENSP00000361471	0.000	0.000	0.000	0.000	0.000	0.000	0.900	0.063	0.902
ASS1	OTC	9606.ENSP00000361471	9606.ENSP00000039007	0.294	0.000	0.299	0.000	0.849	0.000	0.900	0.925	0.999
ASS1	GOT2	9606.ENSP00000361471	9606.ENSP00000245206	0.000	0.000	0.000	0.000	0.122	0.000	0.900	0.345	0.937
ASS1	CAD	9606.ENSP00000361471	9606.ENSP00000264705	0.185	0.155	0.000	0.000	0.501	0.247	0.900	0.557	0.985
ASS1	GOT1	9606.ENSP00000361471	9606.ENSP00000359539	0.000	0.000	0.000	0.000	0.251	0.000	0.900	0.277	0.941
ASS1	CPS1	9606.ENSP00000361471	9606.ENSP00000402608	0.185	0.627	0.000	0.000	0.525	0.247	0.800	0.837	0.995
AUH	MCCC1	9606.ENSP00000364883	9606.ENSP00000265594	0.072	0.000	0.000	0.000	0.075	0.100	0.900	0.390	0.944
AUH	MCCC2	9606.ENSP00000364883	9606.ENSP00000343657	0.072	0.000	0.000	0.000	0.493	0.000	0.900	0.264	0.960
AUH	HMGCS2	9606.ENSP00000364883	9606.ENSP00000358414	0.072	0.000	0.000	0.000	0.062	0.000	0.900	0.357	0.936
AUH	HMGCL	9606.ENSP00000364883	9606.ENSP00000363614	0.072	0.078	0.000	0.000	0.083	0.000	0.900	0.669	0.969
AUH	IVD	9606.ENSP00000364883	9606.ENSP00000418397	0.049	0.000	0.204	0.000	0.122	0.171	0.000	0.599	0.739
AUH	HADH	9606.ENSP00000364883	9606.ENSP00000474560	0.072	0.560	0.358	0.000	0.247	0.193	0.000	0.309	0.864
BCAT1	GCLC	9606.ENSP00000443459	9606.ENSP00000229416	0.000	0.000	0.000	0.000	0.066	0.000	0.900	0.174	0.916
BCAT1	SDS	9606.ENSP00000443459	9606.ENSP00000257549	0.111	0.000	0.000	0.000	0.105	0.000	0.800	0.366	0.885
BCAT1	BCKDHA	9606.ENSP00000443459	9606.ENSP00000269980	0.131	0.000	0.000	0.000	0.076	0.000	0.900	0.648	0.967
BCAT1	BCKDHB	9606.ENSP00000443459	9606.ENSP00000318351	0.147	0.000	0.000	0.000	0.062	0.078	0.900	0.546	0.960
BCAT1	CNDP2	9606.ENSP00000443459	9606.ENSP00000325548	0.060	0.000	0.000	0.000	0.062	0.726	0.000	0.142	0.764
BCAT1	DBT	9606.ENSP00000443459	9606.ENSP00000359151	0.048	0.000	0.000	0.000	0.064	0.069	0.900	0.469	0.947
BCAT1	CTH	9606.ENSP00000443459	9606.ENSP00000359976	0.071	0.000	0.000	0.000	0.065	0.119	0.900	0.352	0.941
BCAT1	SDSL	9606.ENSP00000443459	9606.ENSP00000385790	0.111	0.000	0.000	0.000	0.105	0.000	0.800	0.485	0.907
BCKDHA	SDS	9606.ENSP00000269980	9606.ENSP00000257549	0.000	0.000	0.000	0.000	0.062	0.000	0.900	0.120	0.910
BCKDHA	MCCC1	9606.ENSP00000269980	9606.ENSP00000265594	0.069	0.000	0.000	0.000	0.519	0.000	0.000	0.482	0.748
BCKDHA	CTH	9606.ENSP00000269980	9606.ENSP00000359976	0.000	0.000	0.000	0.000	0.146	0.000	0.800	0.177	0.847
BCKDHA	SDSL	9606.ENSP00000269980	9606.ENSP00000385790	0.000	0.000	0.000	0.000	0.062	0.000	0.900	0.110	0.909
BCKDHA	GCSH	9606.ENSP00000269980	9606.ENSP00000319531	0.057	0.000	0.000	0.000	0.046	0.000	0.900	0.274	0.926
BCKDHA	IVD	9606.ENSP00000269980	9606.ENSP00000418397	0.000	0.004	0.000	0.000	0.294	0.000	0.900	0.605	0.969
BCKDHA	PCCB	9606.ENSP00000269980	9606.ENSP00000419027	0.075	0.000	0.000	0.000	0.358	0.000	0.900	0.563	0.970
BCKDHA	PCCA	9606.ENSP00000269980	9606.ENSP00000365462	0.069	0.000	0.000	0.000	0.516	0.000	0.900	0.555	0.977
BCKDHA	DBT	9606.ENSP00000269980	9606.ENSP00000359151	0.111	0.000	0.403	0.000	0.444	0.369	0.900	0.807	0.995
BCKDHA	BCKDHB	9606.ENSP00000269980	9606.ENSP00000318351	0.167	0.859	0.446	0.000	0.779	0.989	0.800	0.978	0.999
BCKDHB	SDS	9606.ENSP00000318351	9606.ENSP00000257549	0.000	0.000	0.000	0.000	0.063	0.000	0.900	0.095	0.907
BCKDHB	HIBADH	9606.ENSP00000318351	9606.ENSP00000265395	0.083	0.000	0.000	0.000	0.710	0.000	0.000	0.521	0.861
BCKDHB	MCCC1	9606.ENSP00000318351	9606.ENSP00000265594	0.069	0.000	0.000	0.000	0.659	0.222	0.000	0.551	0.874
BCKDHB	SUCLG2	9606.ENSP00000318351	9606.ENSP00000419325	0.000	0.000	0.000	0.000	0.194	0.172	0.540	0.237	0.734
BCKDHB	CTH	9606.ENSP00000318351	9606.ENSP00000359976	0.000	0.000	0.000	0.000	0.109	0.000	0.800	0.092	0.824
BCKDHB	MCCC2	9606.ENSP00000318351	9606.ENSP00000343657	0.078	0.000	0.000	0.000	0.782	0.000	0.000	0.537	0.898
BCKDHB	SDSL	9606.ENSP00000318351	9606.ENSP00000385790	0.000	0.000	0.000	0.000	0.066	0.000	0.900	0.080	0.906
BCKDHB	GCSH	9606.ENSP00000318351	9606.ENSP00000319531	0.000	0.000	0.000	0.000	0.075	0.000	0.900	0.266	0.926
BCKDHB	IVD	9606.ENSP00000318351	9606.ENSP00000418397	0.000	0.000	0.000	0.000	0.294	0.058	0.900	0.705	0.977
BCKDHB	PCCB	9606.ENSP00000318351	9606.ENSP00000419027	0.078	0.000	0.000	0.000	0.650	0.000	0.900	0.628	0.986
BCKDHB	PCCA	9606.ENSP00000318351	9606.ENSP00000365462	0.069	0.000	0.000	0.000	0.644	0.222	0.900	0.629	0.988
BCKDHB	DBT	9606.ENSP00000318351	9606.ENSP00000359151	0.111	0.000	0.404	0.000	0.753	0.521	0.900	0.708	0.997
BDH1	BDH2	9606.ENSP00000376184	9606.ENSP00000296424	0.000	0.000	0.000	0.000	0.053	0.000	0.800	0.780	0.954
BDH1	HMGCS2	9606.ENSP00000376184	9606.ENSP00000358414	0.000	0.000	0.000	0.000	0.062	0.000	0.000	0.696	0.702
BDH1	HMGCL	9606.ENSP00000376184	9606.ENSP00000363614	0.000	0.000	0.000	0.000	0.062	0.000	0.900	0.800	0.979
BDH2	HMGCL	9606.ENSP00000296424	9606.ENSP00000363614	0.000	0.000	0.000	0.000	0.088	0.000	0.900	0.583	0.958
BPGM	GAPDH	9606.ENSP00000376840	9606.ENSP00000229239	0.000	0.000	0.000	0.000	0.231	0.225	0.900	0.406	0.959
BPGM	ENO3	9606.ENSP00000376840	9606.ENSP00000324105	0.073	0.000	0.000	0.000	0.248	0.102	0.900	0.560	0.967
BPGM	PHGDH	9606.ENSP00000376840	9606.ENSP00000358417	0.000	0.015	0.000	0.000	0.000	0.000	0.900	0.307	0.927
BPGM	PGK1	9606.ENSP00000376840	9606.ENSP00000362413	0.000	0.000	0.000	0.000	0.396	0.212	0.900	0.539	0.975
BPGM	GLYCTK	9606.ENSP00000376840	9606.ENSP00000389175	0.000	0.000	0.000	0.000	0.000	0.000	0.900	0.181	0.914
CAD	OTC	9606.ENSP00000264705	9606.ENSP00000039007	0.000	0.000	0.000	0.645	0.271	0.102	0.800	0.458	0.879
CAD	DHODH	9606.ENSP00000264705	9606.ENSP00000219240	0.135	0.000	0.000	0.000	0.268	0.102	0.900	0.729	0.981
CAD	GOT2	9606.ENSP00000264705	9606.ENSP00000245206	0.051	0.000	0.000	0.000	0.136	0.057	0.900	0.238	0.930
CAD	CPS1	9606.ENSP00000264705	9606.ENSP00000402608	0.000	0.000	0.442	0.942	0.000	0.000	0.900	0.330	0.904
CAD	GLS2	9606.ENSP00000264705	9606.ENSP00000310447	0.000	0.000	0.000	0.000	0.063	0.000	0.900	0.132	0.911
CAD	GLS	9606.ENSP00000264705	9606.ENSP00000317379	0.000	0.000	0.000	0.000	0.063	0.000	0.900	0.282	0.926
CAD	GOT1	9606.ENSP00000264705	9606.ENSP00000359539	0.051	0.000	0.000	0.000	0.510	0.056	0.900	0.101	0.953
CAD	GFPT1	9606.ENSP00000264705	9606.ENSP00000349860	0.135	0.000	0.000	0.000	0.065	0.287	0.900	0.480	0.964
CAT	GAPDH	9606.ENSP00000241052	9606.ENSP00000229239	0.000	0.000	0.000	0.000	0.065	0.000	0.000	0.753	0.759
CAT	GCLC	9606.ENSP00000241052	9606.ENSP00000229416	0.000	0.000	0.000	0.000	0.143	0.260	0.000	0.859	0.903
CAT	EHHADH	9606.ENSP00000241052	9606.ENSP00000231887	0.000	0.000	0.000	0.000	0.087	0.531	0.900	0.490	0.975
CAT	DCXR	9606.ENSP00000241052	9606.ENSP00000303356	0.000	0.000	0.000	0.000	0.087	0.670	0.000	0.087	0.700
CAT	GPT	9606.ENSP00000241052	9606.ENSP00000378408	0.000	0.000	0.000	0.000	0.064	0.349	0.000	0.727	0.819
CAT	GOT2	9606.ENSP00000241052	9606.ENSP00000245206	0.000	0.000	0.000	0.000	0.065	0.533	0.000	0.680	0.848
CAT	SORD	9606.ENSP00000241052	9606.ENSP00000267814	0.259	0.000	0.000	0.000	0.195	0.658	0.000	0.387	0.858
CAT	KYNU	9606.ENSP00000241052	9606.ENSP00000264170	0.000	0.000	0.000	0.000	0.076	0.000	0.900	0.103	0.909
CAT	HAAO	9606.ENSP00000241052	9606.ENSP00000294973	0.000	0.000	0.000	0.000	0.093	0.000	0.900	0.085	0.909
CAT	MLYCD	9606.ENSP00000241052	9606.ENSP00000262430	0.000	0.000	0.000	0.000	0.000	0.000	0.900	0.211	0.917
CAT	HMGCL	9606.ENSP00000241052	9606.ENSP00000363614	0.000	0.000	0.000	0.000	0.063	0.129	0.900	0.128	0.919
CAT	HAO2	9606.ENSP00000241052	9606.ENSP00000483507	0.000	0.000	0.000	0.000	0.112	0.000	0.900	0.320	0.934
CAT	HAO1	9606.ENSP00000241052	9606.ENSP00000368066	0.000	0.000	0.000	0.000	0.112	0.000	0.900	0.811	0.981
CBSL	MTHFD1	9606.ENSP00000381231	9606.ENSP00000216605	0.000	0.000	0.000	0.000	0.062	0.000	0.000	0.695	0.702
CBSL	GCLC	9606.ENSP00000381231	9606.ENSP00000229416	0.000	0.000	0.000	0.000	0.062	0.368	0.000	0.622	0.756
CBSL	SDS	9606.ENSP00000381231	9606.ENSP00000257549	0.070	0.000	0.000	0.000	0.064	0.056	0.900	0.349	0.936
CBSL	SHMT1	9606.ENSP00000381231	9606.ENSP00000318868	0.046	0.000	0.000	0.000	0.062	0.000	0.900	0.681	0.967
CBSL	SHMT2	9606.ENSP00000381231	9606.ENSP00000333667	0.046	0.000	0.000	0.000	0.062	0.000	0.900	0.593	0.958
CBSL	MTR	9606.ENSP00000381231	9606.ENSP00000355536	0.055	0.000	0.000	0.000	0.062	0.000	0.900	0.877	0.987
CBSL	CTH	9606.ENSP00000381231	9606.ENSP00000359976	0.219	0.138	0.344	0.000	0.108	0.520	0.900	0.959	0.999
CBSL	MAT1A	9606.ENSP00000381231	9606.ENSP00000361287	0.054	0.000	0.000	0.000	0.068	0.000	0.000	0.697	0.710
CBSL	SDSL	9606.ENSP00000381231	9606.ENSP00000385790	0.070	0.000	0.000	0.000	0.064	0.056	0.900	0.255	0.927
CNDP1	GLS2	9606.ENSP00000351682	9606.ENSP00000310447	0.000	0.000	0.000	0.000	0.059	0.000	0.800	0.000	0.803
CNDP1	GLS	9606.ENSP00000351682	9606.ENSP00000317379	0.000	0.000	0.000	0.000	0.000	0.000	0.800	0.000	0.800
CNDP1	UPB1	9606.ENSP00000351682	9606.ENSP00000324343	0.059	0.000	0.000	0.000	0.062	0.000	0.900	0.120	0.912
CNDP1	CNDP2	9606.ENSP00000351682	9606.ENSP00000325548	0.000	0.000	0.448	0.955	0.062	0.635	0.900	0.951	0.965
CNDP2	GCLC	9606.ENSP00000325548	9606.ENSP00000229416	0.000	0.000	0.000	0.000	0.062	0.000	0.900	0.201	0.918
CNDP2	GLS2	9606.ENSP00000325548	9606.ENSP00000310447	0.000	0.000	0.000	0.000	0.000	0.000	0.800	0.000	0.800
CNDP2	GLS	9606.ENSP00000325548	9606.ENSP00000317379	0.000	0.000	0.000	0.000	0.000	0.000	0.800	0.000	0.800
CNDP2	UPB1	9606.ENSP00000325548	9606.ENSP00000324343	0.059	0.000	0.000	0.000	0.062	0.000	0.900	0.106	0.910
CNDP2	PCCA	9606.ENSP00000325548	9606.ENSP00000365462	0.000	0.000	0.000	0.000	0.136	0.738	0.000	0.055	0.767
CPS1	OTC	9606.ENSP00000402608	9606.ENSP00000039007	0.000	0.277	0.000	0.000	0.289	0.213	0.900	0.822	0.991
CPS1	GLS2	9606.ENSP00000402608	9606.ENSP00000310447	0.000	0.000	0.000	0.000	0.087	0.000	0.900	0.293	0.929
CPS1	GLS	9606.ENSP00000402608	9606.ENSP00000317379	0.000	0.000	0.000	0.000	0.065	0.000	0.900	0.200	0.918
CSAD	GOT2	9606.ENSP00000267085	9606.ENSP00000245206	0.000	0.000	0.000	0.000	0.062	0.000	0.800	0.225	0.842
CSAD	GOT1	9606.ENSP00000267085	9606.ENSP00000359539	0.000	0.000	0.000	0.000	0.053	0.000	0.800	0.266	0.848
CTH	GCLC	9606.ENSP00000359976	9606.ENSP00000229416	0.000	0.000	0.000	0.000	0.161	0.727	0.800	0.627	0.980
CTH	GOT2	9606.ENSP00000359976	9606.ENSP00000245206	0.000	0.000	0.000	0.000	0.064	0.000	0.900	0.389	0.937
CTH	SDS	9606.ENSP00000359976	9606.ENSP00000257549	0.165	0.000	0.000	0.000	0.071	0.000	0.800	0.595	0.928
CTH	MTR	9606.ENSP00000359976	9606.ENSP00000355536	0.184	0.000	0.000	0.000	0.065	0.000	0.900	0.755	0.978
CTH	GOT1	9606.ENSP00000359976	9606.ENSP00000359539	0.000	0.000	0.000	0.000	0.076	0.000	0.900	0.579	0.957
CTH	MAT1A	9606.ENSP00000359976	9606.ENSP00000361287	0.000	0.000	0.000	0.000	0.109	0.119	0.000	0.731	0.770
CTH	SDSL	9606.ENSP00000359976	9606.ENSP00000385790	0.165	0.000	0.000	0.000	0.071	0.000	0.800	0.421	0.898
DBT	EHHADH	9606.ENSP00000359151	9606.ENSP00000231887	0.000	0.000	0.000	0.000	0.062	0.000	0.800	0.101	0.816
DBT	SDS	9606.ENSP00000359151	9606.ENSP00000257549	0.044	0.000	0.000	0.000	0.062	0.000	0.900	0.107	0.909
DBT	HIBADH	9606.ENSP00000359151	9606.ENSP00000265395	0.060	0.000	0.000	0.000	0.183	0.000	0.800	0.565	0.924
DBT	MCCC1	9606.ENSP00000359151	9606.ENSP00000265594	0.000	0.000	0.000	0.000	0.469	0.143	0.000	0.442	0.724
DBT	GCSH	9606.ENSP00000359151	9606.ENSP00000319531	0.089	0.000	0.000	0.000	0.062	0.248	0.900	0.310	0.947
DBT	HADHB	9606.ENSP00000359151	9606.ENSP00000325136	0.046	0.000	0.000	0.000	0.096	0.000	0.800	0.140	0.831
DBT	ECHS1	9606.ENSP00000359151	9606.ENSP00000357535	0.000	0.000	0.000	0.000	0.064	0.488	0.000	0.465	0.721
DBT	SUCLG2	9606.ENSP00000359151	9606.ENSP00000419325	0.081	0.000	0.000	0.000	0.204	0.175	0.540	0.176	0.729
DBT	OGDHL	9606.ENSP00000359151	9606.ENSP00000363216	0.081	0.000	0.000	0.000	0.239	0.347	0.540	0.153	0.789
DBT	SDSL	9606.ENSP00000359151	9606.ENSP00000385790	0.044	0.000	0.000	0.000	0.062	0.000	0.900	0.107	0.909
DBT	PCCB	9606.ENSP00000359151	9606.ENSP00000419027	0.046	0.000	0.000	0.000	0.235	0.000	0.900	0.512	0.959
DBT	PCCA	9606.ENSP00000359151	9606.ENSP00000365462	0.000	0.000	0.000	0.000	0.469	0.143	0.900	0.488	0.973
DBT	IVD	9606.ENSP00000359151	9606.ENSP00000418397	0.047	0.000	0.000	0.000	0.388	0.000	0.900	0.641	0.976
DCXR	SORD	9606.ENSP00000303356	9606.ENSP00000267814	0.000	0.000	0.000	0.000	0.101	0.000	0.900	0.339	0.935
DHODH	UPB1	9606.ENSP00000219240	9606.ENSP00000324343	0.054	0.000	0.000	0.000	0.064	0.243	0.000	0.624	0.714
DPYD	DPYS	9606.ENSP00000359211	9606.ENSP00000276651	0.081	0.000	0.217	0.000	0.066	0.300	0.900	0.751	0.985
DPYD	HPD	9606.ENSP00000359211	9606.ENSP00000289004	0.000	0.000	0.000	0.000	0.119	0.726	0.000	0.132	0.772
DPYD	UGT1A6	9606.ENSP00000359211	9606.ENSP00000303174	0.000	0.000	0.000	0.000	0.064	0.000	0.000	0.703	0.710
DPYD	UGT1A8	9606.ENSP00000359211	9606.ENSP00000304845	0.000	0.000	0.000	0.000	0.064	0.000	0.000	0.710	0.716
DPYD	UPB1	9606.ENSP00000359211	9606.ENSP00000324343	0.054	0.000	0.201	0.000	0.196	0.243	0.800	0.878	0.986
DPYD	ECHS1	9606.ENSP00000359211	9606.ENSP00000357535	0.000	0.000	0.000	0.000	0.062	0.726	0.000	0.078	0.742
DPYS	UPB1	9606.ENSP00000276651	9606.ENSP00000324343	0.059	0.211	0.234	0.000	0.083	0.000	0.900	0.854	0.990
ECHS1	HSD17B10	9606.ENSP00000357535	9606.ENSP00000168216	0.000	0.000	0.000	0.000	0.845	0.137	0.900	0.516	0.992
ECHS1	EHHADH	9606.ENSP00000357535	9606.ENSP00000231887	0.000	0.000	0.208	0.740	0.064	0.253	0.900	0.655	0.939
ECHS1	HIBADH	9606.ENSP00000357535	9606.ENSP00000265395	0.070	0.000	0.000	0.000	0.466	0.385	0.000	0.452	0.810
ECHS1	MCCC1	9606.ENSP00000357535	9606.ENSP00000265594	0.072	0.000	0.000	0.000	0.093	0.100	0.900	0.442	0.950
ECHS1	HADHB	9606.ENSP00000357535	9606.ENSP00000325136	0.057	0.000	0.000	0.000	0.494	0.251	0.000	0.817	0.926
ECHS1	MCCC2	9606.ENSP00000357535	9606.ENSP00000343657	0.072	0.000	0.000	0.000	0.648	0.000	0.900	0.451	0.979
ECHS1	PCCB	9606.ENSP00000357535	9606.ENSP00000419027	0.072	0.000	0.000	0.000	0.437	0.000	0.000	0.547	0.743
ECHS1	HADHA	9606.ENSP00000357535	9606.ENSP00000370023	0.000	0.000	0.000	0.691	0.176	0.253	0.900	0.687	0.947
ECHS1	IVD	9606.ENSP00000357535	9606.ENSP00000418397	0.049	0.000	0.201	0.000	0.122	0.246	0.900	0.400	0.962
ECHS1	HADH	9606.ENSP00000357535	9606.ENSP00000474560	0.072	0.790	0.282	0.000	0.506	0.369	0.900	0.669	0.998
EHHADH	HSD17B10	9606.ENSP00000231887	9606.ENSP00000168216	0.000	0.000	0.000	0.000	0.124	0.137	0.900	0.313	0.941
EHHADH	PCCA	9606.ENSP00000231887	9606.ENSP00000365462	0.072	0.000	0.000	0.000	0.064	0.100	0.800	0.171	0.846
EHHADH	PCCB	9606.ENSP00000231887	9606.ENSP00000419027	0.072	0.000	0.000	0.000	0.112	0.000	0.800	0.200	0.850
EHHADH	HIBADH	9606.ENSP00000231887	9606.ENSP00000265395	0.070	0.000	0.000	0.000	0.092	0.192	0.800	0.214	0.873
EHHADH	MCCC2	9606.ENSP00000231887	9606.ENSP00000343657	0.072	0.000	0.000	0.000	0.112	0.000	0.900	0.137	0.919
EHHADH	HADHA	9606.ENSP00000231887	9606.ENSP00000370023	0.000	0.000	0.299	0.748	0.062	0.000	0.900	0.675	0.924
EHHADH	MCCC1	9606.ENSP00000231887	9606.ENSP00000265594	0.072	0.000	0.000	0.000	0.064	0.100	0.900	0.193	0.925
EHHADH	HADH	9606.ENSP00000231887	9606.ENSP00000474560	0.072	0.000	0.000	0.726	0.138	0.244	0.900	0.810	0.946
EHHADH	IVD	9606.ENSP00000231887	9606.ENSP00000418397	0.049	0.000	0.000	0.000	0.122	0.199	0.900	0.356	0.949
EHHADH	MLYCD	9606.ENSP00000231887	9606.ENSP00000262430	0.042	0.000	0.000	0.000	0.064	0.000	0.900	0.509	0.950
EHHADH	HMGCL	9606.ENSP00000231887	9606.ENSP00000363614	0.072	0.000	0.000	0.000	0.078	0.000	0.900	0.514	0.952
EHHADH	HAO1	9606.ENSP00000231887	9606.ENSP00000368066	0.070	0.000	0.000	0.000	0.072	0.000	0.900	0.568	0.957
EHHADH	HMGCS2	9606.ENSP00000231887	9606.ENSP00000358414	0.072	0.000	0.000	0.000	0.066	0.000	0.900	0.595	0.960
EHHADH	HAO2	9606.ENSP00000231887	9606.ENSP00000483507	0.070	0.000	0.000	0.000	0.065	0.000	0.900	0.623	0.962
EHHADH	HADHB	9606.ENSP00000231887	9606.ENSP00000325136	0.057	0.018	0.000	0.000	0.127	0.251	0.900	0.636	0.973
ENO3	PYGM	9606.ENSP00000324105	9606.ENSP00000164139	0.057	0.000	0.000	0.000	0.478	0.348	0.000	0.580	0.847
ENO3	PCK2	9606.ENSP00000324105	9606.ENSP00000216780	0.000	0.000	0.000	0.000	0.000	0.000	0.900	0.410	0.938
ENO3	PYGB	9606.ENSP00000324105	9606.ENSP00000216962	0.057	0.000	0.000	0.000	0.478	0.250	0.000	0.358	0.731
ENO3	GAPDH	9606.ENSP00000324105	9606.ENSP00000229239	0.081	0.000	0.000	0.000	0.514	0.520	0.000	0.626	0.909
ENO3	GOT2	9606.ENSP00000324105	9606.ENSP00000245206	0.000	0.000	0.000	0.000	0.636	0.000	0.000	0.266	0.721
ENO3	PCK1	9606.ENSP00000324105	9606.ENSP00000319814	0.000	0.000	0.000	0.000	0.000	0.000	0.900	0.408	0.938
ENO3	PKM	9606.ENSP00000324105	9606.ENSP00000320171	0.111	0.000	0.000	0.000	0.515	0.334	0.900	0.704	0.989
ENO3	NME1-NME2	9606.ENSP00000324105	9606.ENSP00000376886	0.045	0.000	0.000	0.000	0.155	0.648	0.000	0.135	0.721
ENO3	PGM1	9606.ENSP00000324105	9606.ENSP00000360124	0.000	0.000	0.000	0.000	0.515	0.255	0.000	0.619	0.850
ENO3	TKT	9606.ENSP00000324105	9606.ENSP00000391481	0.042	0.000	0.000	0.000	0.183	0.415	0.600	0.360	0.861
ENO3	GLYCTK	9606.ENSP00000324105	9606.ENSP00000389175	0.166	0.000	0.000	0.000	0.000	0.000	0.800	0.263	0.866
ENO3	PGK1	9606.ENSP00000324105	9606.ENSP00000362413	0.111	0.000	0.349	0.000	0.501	0.495	0.000	0.662	0.941
ENPP1	PYGM	9606.ENSP00000354238	9606.ENSP00000164139	0.000	0.000	0.000	0.000	0.000	0.000	0.900	0.324	0.929
ENPP1	PYGL	9606.ENSP00000354238	9606.ENSP00000216392	0.000	0.000	0.000	0.000	0.062	0.000	0.900	0.184	0.916
ENPP1	PYGB	9606.ENSP00000354238	9606.ENSP00000216962	0.000	0.000	0.000	0.000	0.000	0.000	0.900	0.130	0.909
ENPP1	GYS2	9606.ENSP00000354238	9606.ENSP00000261195	0.000	0.000	0.000	0.000	0.064	0.000	0.900	0.104	0.908
ENPP1	FLAD1	9606.ENSP00000354238	9606.ENSP00000292180	0.000	0.000	0.000	0.000	0.000	0.000	0.800	0.044	0.800
ENPP1	PGM2L1	9606.ENSP00000354238	9606.ENSP00000298198	0.000	0.000	0.000	0.000	0.063	0.000	0.900	0.055	0.903
ENPP1	PANK1	9606.ENSP00000354238	9606.ENSP00000302108	0.000	0.000	0.000	0.000	0.062	0.000	0.900	0.000	0.902
ENPP1	PKM	9606.ENSP00000354238	9606.ENSP00000320171	0.044	0.000	0.000	0.000	0.062	0.000	0.900	0.062	0.904
ENPP1	UGP2	9606.ENSP00000354238	9606.ENSP00000338703	0.000	0.000	0.000	0.000	0.062	0.000	0.800	0.066	0.809
ENPP1	GYG1	9606.ENSP00000354238	9606.ENSP00000340736	0.000	0.000	0.000	0.000	0.062	0.000	0.900	0.107	0.908
ENPP1	GCH1	9606.ENSP00000354238	9606.ENSP00000419045	0.000	0.000	0.000	0.000	0.062	0.000	0.800	0.000	0.804
ENPP1	NADK2	9606.ENSP00000354238	9606.ENSP00000371362	0.000	0.000	0.000	0.000	0.000	0.000	0.900	0.000	0.900
ENPP1	NAPRT	9606.ENSP00000354238	9606.ENSP00000401508	0.000	0.000	0.000	0.000	0.062	0.000	0.900	0.091	0.907
ENPP1	GYG2	9606.ENSP00000354238	9606.ENSP00000370555	0.000	0.000	0.000	0.000	0.062	0.000	0.900	0.107	0.908
EPRS	GAPDH	9606.ENSP00000355890	9606.ENSP00000229239	0.070	0.000	0.000	0.000	0.139	0.595	0.900	0.912	0.996
EPRS	MCEE	9606.ENSP00000355890	9606.ENSP00000244217	0.077	0.000	0.000	0.000	0.084	0.698	0.000	0.138	0.750
EPRS	GLS2	9606.ENSP00000355890	9606.ENSP00000310447	0.075	0.000	0.000	0.000	0.000	0.000	0.800	0.055	0.809
EPRS	GLS	9606.ENSP00000355890	9606.ENSP00000317379	0.075	0.000	0.000	0.000	0.000	0.000	0.800	0.055	0.809
ESD	GOT2	9606.ENSP00000367992	9606.ENSP00000245206	0.000	0.000	0.000	0.000	0.068	0.670	0.000	0.143	0.713
ESD	PGM2L1	9606.ENSP00000367992	9606.ENSP00000298198	0.000	0.000	0.000	0.000	0.062	0.726	0.000	0.000	0.732
ESD	GOT1	9606.ENSP00000367992	9606.ENSP00000359539	0.000	0.000	0.000	0.000	0.084	0.788	0.000	0.250	0.841
ESD	PGM1	9606.ENSP00000367992	9606.ENSP00000360124	0.000	0.000	0.000	0.000	0.144	0.670	0.000	0.833	0.949
ESD	HAGH	9606.ENSP00000367992	9606.ENSP00000380514	0.000	0.000	0.000	0.000	0.116	0.000	0.000	0.706	0.729
FBP1	PCK2	9606.ENSP00000408025	9606.ENSP00000216780	0.000	0.000	0.000	0.000	0.148	0.000	0.000	0.732	0.762
FBP1	PCK1	9606.ENSP00000408025	9606.ENSP00000319814	0.000	0.000	0.000	0.000	0.082	0.000	0.000	0.783	0.792
FBP1	PKM	9606.ENSP00000408025	9606.ENSP00000320171	0.070	0.000	0.000	0.000	0.073	0.000	0.000	0.807	0.819
FBP1	PC	9606.ENSP00000408025	9606.ENSP00000377532	0.000	0.000	0.000	0.000	0.066	0.000	0.000	0.764	0.771
FBP1	TKT	9606.ENSP00000408025	9606.ENSP00000391481	0.135	0.000	0.000	0.000	0.065	0.000	0.900	0.590	0.962
G6PC2	GALM	9606.ENSP00000364512	9606.ENSP00000272252	0.000	0.000	0.000	0.000	0.064	0.000	0.900	0.059	0.904
G6PC2	TKT	9606.ENSP00000364512	9606.ENSP00000391481	0.000	0.000	0.000	0.000	0.000	0.000	0.800	0.055	0.802
G6PC2	GLYCTK	9606.ENSP00000364512	9606.ENSP00000389175	0.000	0.000	0.000	0.000	0.067	0.000	0.800	0.000	0.805
GAPDH	MUT	9606.ENSP00000229239	9606.ENSP00000274813	0.000	0.000	0.000	0.000	0.000	0.000	0.000	0.740	0.740
GAPDH	SDHA	9606.ENSP00000229239	9606.ENSP00000264932	0.000	0.000	0.000	0.000	0.122	0.000	0.000	0.783	0.801
GAPDH	GLYCTK	9606.ENSP00000229239	9606.ENSP00000389175	0.000	0.000	0.000	0.000	0.053	0.000	0.800	0.137	0.822
GAPDH	SHMT1	9606.ENSP00000229239	9606.ENSP00000318868	0.088	0.000	0.000	0.000	0.066	0.369	0.000	0.779	0.865
GAPDH	NME1	9606.ENSP00000229239	9606.ENSP00000337060	0.046	0.000	0.000	0.000	0.357	0.000	0.000	0.798	0.866
GAPDH	SHMT2	9606.ENSP00000229239	9606.ENSP00000333667	0.088	0.000	0.000	0.000	0.174	0.369	0.000	0.800	0.892
GAPDH	TKT	9606.ENSP00000229239	9606.ENSP00000391481	0.111	0.000	0.000	0.000	0.142	0.425	0.800	0.633	0.962
GAPDH	PKM	9606.ENSP00000229239	9606.ENSP00000320171	0.135	0.000	0.000	0.000	0.705	0.494	0.000	0.765	0.965
GAPDH	PGK1	9606.ENSP00000229239	9606.ENSP00000362413	0.135	0.009	0.000	0.000	0.598	0.917	0.900	0.807	0.999
GCH1	PKM	9606.ENSP00000419045	9606.ENSP00000320171	0.195	0.000	0.000	0.000	0.066	0.000	0.800	0.050	0.838
GCH1	NME1	9606.ENSP00000419045	9606.ENSP00000337060	0.111	0.000	0.000	0.000	0.064	0.142	0.800	0.069	0.842
GCH1	NME7	9606.ENSP00000419045	9606.ENSP00000356785	0.111	0.000	0.000	0.000	0.064	0.103	0.800	0.056	0.833
GCH1	NME1-NME2	9606.ENSP00000419045	9606.ENSP00000376886	0.111	0.000	0.000	0.000	0.064	0.142	0.800	0.069	0.842
GCH1	PAH	9606.ENSP00000419045	9606.ENSP00000448059	0.000	0.000	0.000	0.000	0.081	0.246	0.000	0.652	0.738
GCLC	GOT1	9606.ENSP00000229416	9606.ENSP00000359539	0.000	0.000	0.000	0.000	0.052	0.000	0.800	0.186	0.832
GCLC	GOT2	9606.ENSP00000229416	9606.ENSP00000245206	0.000	0.000	0.000	0.000	0.062	0.000	0.800	0.211	0.839
GCLC	GLS	9606.ENSP00000229416	9606.ENSP00000317379	0.000	0.000	0.000	0.000	0.062	0.000	0.800	0.282	0.853
GCLC	GLS2	9606.ENSP00000229416	9606.ENSP00000310447	0.000	0.000	0.000	0.000	0.062	0.000	0.800	0.325	0.862
GCSH	GGH	9606.ENSP00000319531	9606.ENSP00000260118	0.000	0.000	0.000	0.000	0.142	0.000	0.000	0.727	0.756
GCSH	LIAS	9606.ENSP00000319531	9606.ENSP00000261434	0.219	0.000	0.215	0.000	0.090	0.000	0.900	0.665	0.977
GCSH	GLS2	9606.ENSP00000319531	9606.ENSP00000310447	0.000	0.000	0.000	0.000	0.000	0.000	0.800	0.245	0.842
GCSH	GLS	9606.ENSP00000319531	9606.ENSP00000317379	0.000	0.000	0.000	0.000	0.000	0.000	0.800	0.087	0.809
GCSH	SHMT1	9606.ENSP00000319531	9606.ENSP00000318868	0.219	0.000	0.000	0.000	0.184	0.056	0.900	0.744	0.981
GCSH	PSAT1	9606.ENSP00000319531	9606.ENSP00000365773	0.177	0.000	0.000	0.000	0.196	0.000	0.000	0.659	0.755
GCSH	SHMT2	9606.ENSP00000319531	9606.ENSP00000333667	0.219	0.000	0.000	0.000	0.211	0.056	0.900	0.698	0.979
GCSH	GLDC	9606.ENSP00000319531	9606.ENSP00000370737	0.295	0.000	0.238	0.000	0.664	0.103	0.900	0.965	0.999
GFPT1	GLS2	9606.ENSP00000349860	9606.ENSP00000310447	0.041	0.000	0.000	0.000	0.000	0.000	0.900	0.358	0.933
GFPT1	GLS	9606.ENSP00000349860	9606.ENSP00000317379	0.041	0.000	0.000	0.000	0.000	0.000	0.900	0.402	0.937
GLDC	GLS2	9606.ENSP00000370737	9606.ENSP00000310447	0.000	0.000	0.000	0.000	0.082	0.000	0.800	0.679	0.936
GLDC	GLS	9606.ENSP00000370737	9606.ENSP00000317379	0.000	0.000	0.000	0.000	0.064	0.000	0.800	0.462	0.890
GLDC	SHMT1	9606.ENSP00000370737	9606.ENSP00000318868	0.219	0.136	0.000	0.000	0.344	0.000	0.900	0.845	0.991
GLDC	SHMT2	9606.ENSP00000370737	9606.ENSP00000333667	0.219	0.133	0.000	0.000	0.344	0.000	0.900	0.838	0.991
GLDC	PSAT1	9606.ENSP00000370737	9606.ENSP00000365773	0.084	0.000	0.000	0.000	0.117	0.065	0.000	0.689	0.734
GLDC	MTHFD1L	9606.ENSP00000370737	9606.ENSP00000478253	0.177	0.000	0.000	0.000	0.096	0.000	0.000	0.663	0.728
GLS	GLS2	9606.ENSP00000317379	9606.ENSP00000310447	0.000	0.000	0.448	0.971	0.000	0.000	0.800	0.865	0.807
GLYCTK	GRHPR	9606.ENSP00000389175	9606.ENSP00000313432	0.295	0.265	0.000	0.000	0.065	0.000	0.900	0.580	0.976
GLYCTK	PKM	9606.ENSP00000389175	9606.ENSP00000320171	0.219	0.000	0.000	0.000	0.066	0.000	0.800	0.385	0.898
GOT1	PCK2	9606.ENSP00000359539	9606.ENSP00000216780	0.000	0.000	0.000	0.000	0.062	0.000	0.800	0.262	0.849
GOT1	GOT2	9606.ENSP00000359539	9606.ENSP00000245206	0.000	0.000	0.448	0.937	0.283	0.244	0.800	0.812	0.891
GOT1	HPD	9606.ENSP00000359539	9606.ENSP00000289004	0.135	0.000	0.000	0.000	0.062	0.000	0.900	0.176	0.924
GOT1	PCK1	9606.ENSP00000359539	9606.ENSP00000319814	0.000	0.000	0.000	0.000	0.000	0.000	0.800	0.219	0.837
GOT1	IDH2	9606.ENSP00000359539	9606.ENSP00000331897	0.000	0.000	0.000	0.000	0.183	0.000	0.800	0.413	0.895
GOT1	GPT2	9606.ENSP00000359539	9606.ENSP00000345282	0.000	0.000	0.000	0.000	0.094	0.272	0.800	0.882	0.982
GOT1	OGDHL	9606.ENSP00000359539	9606.ENSP00000363216	0.000	0.000	0.000	0.000	0.097	0.000	0.800	0.431	0.888
GOT1	NIT2	9606.ENSP00000359539	9606.ENSP00000377696	0.000	0.000	0.000	0.000	0.000	0.000	0.900	0.189	0.915
GOT1	PAH	9606.ENSP00000359539	9606.ENSP00000448059	0.081	0.000	0.000	0.000	0.062	0.000	0.900	0.261	0.927
GOT1	PC	9606.ENSP00000359539	9606.ENSP00000377532	0.000	0.000	0.000	0.000	0.091	0.270	0.800	0.533	0.929
GOT1	HOGA1	9606.ENSP00000359539	9606.ENSP00000359680	0.045	0.000	0.000	0.000	0.063	0.000	0.900	0.303	0.929
GOT1	GPT	9606.ENSP00000359539	9606.ENSP00000378408	0.000	0.000	0.000	0.000	0.094	0.000	0.800	0.859	0.972
GOT2	PCK2	9606.ENSP00000245206	9606.ENSP00000216780	0.000	0.000	0.000	0.000	0.047	0.000	0.800	0.358	0.867
GOT2	PGM1	9606.ENSP00000245206	9606.ENSP00000360124	0.000	0.000	0.000	0.000	0.186	0.343	0.000	0.497	0.707
GOT2	TKT	9606.ENSP00000245206	9606.ENSP00000391481	0.000	0.000	0.000	0.000	0.115	0.611	0.000	0.364	0.762
GOT2	PHGDH	9606.ENSP00000245206	9606.ENSP00000358417	0.000	0.000	0.000	0.000	0.064	0.726	0.000	0.171	0.768
GOT2	SDHA	9606.ENSP00000245206	9606.ENSP00000264932	0.000	0.000	0.000	0.000	0.219	0.056	0.600	0.415	0.804
GOT2	OGDHL	9606.ENSP00000245206	9606.ENSP00000363216	0.000	0.000	0.000	0.000	0.087	0.000	0.800	0.296	0.860
GOT2	PCK1	9606.ENSP00000245206	9606.ENSP00000319814	0.000	0.000	0.000	0.000	0.000	0.000	0.800	0.382	0.871
GOT2	HIBADH	9606.ENSP00000245206	9606.ENSP00000265395	0.000	0.000	0.000	0.000	0.508	0.726	0.000	0.244	0.889
GOT2	NIT2	9606.ENSP00000245206	9606.ENSP00000377696	0.000	0.000	0.000	0.000	0.077	0.000	0.900	0.188	0.918
GOT2	HPD	9606.ENSP00000245206	9606.ENSP00000289004	0.135	0.000	0.000	0.000	0.000	0.000	0.900	0.182	0.923
GOT2	HOGA1	9606.ENSP00000245206	9606.ENSP00000359680	0.045	0.000	0.000	0.000	0.063	0.000	0.900	0.251	0.924
GOT2	PAH	9606.ENSP00000245206	9606.ENSP00000448059	0.081	0.000	0.000	0.000	0.000	0.000	0.900	0.249	0.925
GOT2	PC	9606.ENSP00000245206	9606.ENSP00000377532	0.000	0.000	0.000	0.000	0.064	0.213	0.800	0.656	0.942
GOT2	IDH2	9606.ENSP00000245206	9606.ENSP00000331897	0.000	0.000	0.000	0.000	0.552	0.000	0.800	0.616	0.962
GOT2	GPT	9606.ENSP00000245206	9606.ENSP00000378408	0.000	0.000	0.000	0.000	0.102	0.000	0.800	0.812	0.963
GOT2	GPT2	9606.ENSP00000245206	9606.ENSP00000345282	0.000	0.000	0.000	0.000	0.102	0.000	0.800	0.832	0.967
GPT	SDHA	9606.ENSP00000378408	9606.ENSP00000264932	0.000	0.000	0.000	0.000	0.162	0.000	0.800	0.249	0.863
GPT	SORD	9606.ENSP00000378408	9606.ENSP00000267814	0.045	0.000	0.000	0.000	0.086	0.000	0.000	0.712	0.727
GPT	IDH2	9606.ENSP00000378408	9606.ENSP00000331897	0.041	0.000	0.000	0.000	0.142	0.000	0.800	0.271	0.864
GPT	GPT2	9606.ENSP00000378408	9606.ENSP00000345282	0.000	0.000	0.445	0.974	0.062	0.000	0.800	0.789	0.810
GPT	PHGDH	9606.ENSP00000378408	9606.ENSP00000358417	0.060	0.000	0.000	0.000	0.066	0.726	0.000	0.412	0.839
GPT	OGDHL	9606.ENSP00000378408	9606.ENSP00000363216	0.000	0.000	0.000	0.000	0.108	0.000	0.800	0.086	0.822
GPT2	SDHA	9606.ENSP00000345282	9606.ENSP00000264932	0.000	0.000	0.000	0.000	0.162	0.000	0.800	0.213	0.856
GPT2	IDH2	9606.ENSP00000345282	9606.ENSP00000331897	0.041	0.000	0.000	0.000	0.123	0.000	0.800	0.456	0.896
GPT2	OGDHL	9606.ENSP00000345282	9606.ENSP00000363216	0.000	0.000	0.000	0.000	0.130	0.000	0.800	0.146	0.838
GPT2	PHGDH	9606.ENSP00000345282	9606.ENSP00000358417	0.060	0.000	0.000	0.000	0.153	0.726	0.000	0.474	0.870
GRHPR	SDS	9606.ENSP00000313432	9606.ENSP00000257549	0.000	0.000	0.000	0.000	0.065	0.000	0.800	0.077	0.812
GRHPR	PGM1	9606.ENSP00000313432	9606.ENSP00000360124	0.045	0.000	0.000	0.000	0.240	0.664	0.000	0.000	0.734
GRHPR	SDSL	9606.ENSP00000313432	9606.ENSP00000385790	0.000	0.000	0.000	0.000	0.065	0.000	0.800	0.077	0.812
GRHPR	HAO2	9606.ENSP00000313432	9606.ENSP00000483507	0.219	0.000	0.000	0.000	0.156	0.000	0.900	0.258	0.944
GRHPR	HYI	9606.ENSP00000313432	9606.ENSP00000361502	0.223	0.000	0.000	0.000	0.066	0.000	0.900	0.432	0.953
GRHPR	HAO1	9606.ENSP00000313432	9606.ENSP00000368066	0.219	0.000	0.000	0.000	0.187	0.000	0.900	0.465	0.961
GRHPR	HOGA1	9606.ENSP00000313432	9606.ENSP00000359680	0.219	0.000	0.000	0.000	0.154	0.000	0.900	0.895	0.992
GYG1	PYGM	9606.ENSP00000340736	9606.ENSP00000164139	0.000	0.000	0.000	0.000	0.083	0.056	0.900	0.526	0.953
GYG1	PYGL	9606.ENSP00000340736	9606.ENSP00000216392	0.000	0.000	0.000	0.000	0.083	0.056	0.650	0.475	0.819
GYG1	PYGB	9606.ENSP00000340736	9606.ENSP00000216962	0.000	0.000	0.000	0.000	0.083	0.056	0.900	0.535	0.954
GYG1	GYS2	9606.ENSP00000340736	9606.ENSP00000261195	0.000	0.000	0.000	0.000	0.109	0.693	0.800	0.676	0.979
GYG1	UGP2	9606.ENSP00000340736	9606.ENSP00000338703	0.000	0.000	0.000	0.000	0.104	0.000	0.900	0.618	0.962
GYG1	GYG2	9606.ENSP00000340736	9606.ENSP00000370555	0.000	0.000	0.000	0.947	0.000	0.695	0.800	0.960	0.939
GYG2	PYGM	9606.ENSP00000370555	9606.ENSP00000164139	0.000	0.000	0.000	0.000	0.083	0.056	0.650	0.392	0.791
GYG2	PYGL	9606.ENSP00000370555	9606.ENSP00000216392	0.000	0.000	0.000	0.000	0.083	0.056	0.900	0.352	0.936
GYG2	PYGB	9606.ENSP00000370555	9606.ENSP00000216962	0.000	0.000	0.000	0.000	0.083	0.056	0.650	0.343	0.774
GYG2	GYS2	9606.ENSP00000370555	9606.ENSP00000261195	0.000	0.000	0.000	0.000	0.109	0.715	0.800	0.559	0.974
GYG2	UGP2	9606.ENSP00000370555	9606.ENSP00000338703	0.000	0.000	0.000	0.000	0.104	0.000	0.900	0.429	0.944
GYS2	PYGM	9606.ENSP00000261195	9606.ENSP00000164139	0.000	0.000	0.000	0.000	0.510	0.119	0.000	0.771	0.892
GYS2	PYGL	9606.ENSP00000261195	9606.ENSP00000216392	0.000	0.000	0.000	0.000	0.510	0.104	0.000	0.839	0.923
GYS2	PYGB	9606.ENSP00000261195	9606.ENSP00000216962	0.000	0.000	0.000	0.000	0.510	0.119	0.000	0.763	0.888
GYS2	UGP2	9606.ENSP00000261195	9606.ENSP00000338703	0.000	0.000	0.000	0.000	0.228	0.000	0.900	0.729	0.977
HAAO	KYNU	9606.ENSP00000294973	9606.ENSP00000264170	0.000	0.000	0.405	0.000	0.651	0.000	0.900	0.933	0.998
HAAO	IDO2	9606.ENSP00000294973	9606.ENSP00000443432	0.000	0.000	0.000	0.000	0.167	0.000	0.000	0.662	0.706
HAAO	NAPRT	9606.ENSP00000294973	9606.ENSP00000401508	0.000	0.000	0.000	0.000	0.066	0.167	0.000	0.703	0.748
HAAO	PAH	9606.ENSP00000294973	9606.ENSP00000448059	0.000	0.000	0.000	0.000	0.566	0.000	0.000	0.502	0.774
HAAO	TDO2	9606.ENSP00000294973	9606.ENSP00000444788	0.000	0.000	0.000	0.000	0.145	0.000	0.000	0.851	0.867
HAAO	KMO	9606.ENSP00000294973	9606.ENSP00000355517	0.000	0.000	0.416	0.000	0.653	0.000	0.000	0.939	0.986
HADH	HIBADH	9606.ENSP00000474560	9606.ENSP00000265395	0.000	0.000	0.000	0.000	0.286	0.391	0.000	0.422	0.727
HADH	HADHB	9606.ENSP00000474560	9606.ENSP00000325136	0.093	0.006	0.295	0.000	0.166	0.386	0.900	0.863	0.994
HADH	MCCC2	9606.ENSP00000474560	9606.ENSP00000343657	0.051	0.000	0.000	0.000	0.817	0.000	0.000	0.318	0.871
HADHA	HSD17B10	9606.ENSP00000370023	9606.ENSP00000168216	0.000	0.000	0.000	0.000	0.147	0.272	0.900	0.426	0.959
HADHA	HIBADH	9606.ENSP00000370023	9606.ENSP00000265395	0.070	0.000	0.000	0.000	0.149	0.192	0.000	0.709	0.789
HADHA	MCCC1	9606.ENSP00000370023	9606.ENSP00000265594	0.072	0.000	0.000	0.000	0.064	0.100	0.900	0.282	0.933
HADHA	HADHB	9606.ENSP00000370023	9606.ENSP00000325136	0.057	0.042	0.315	0.000	0.987	0.994	0.900	0.993	0.999
HADHA	MCCC2	9606.ENSP00000370023	9606.ENSP00000343657	0.072	0.000	0.000	0.000	0.114	0.000	0.900	0.377	0.941
HADHA	IVD	9606.ENSP00000370023	9606.ENSP00000418397	0.049	0.000	0.000	0.000	0.125	0.199	0.900	0.300	0.944
HADHB	HSD17B10	9606.ENSP00000325136	9606.ENSP00000168216	0.000	0.000	0.000	0.000	0.820	0.204	0.900	0.414	0.990
HADHB	SUCLG2	9606.ENSP00000325136	9606.ENSP00000419325	0.048	0.000	0.000	0.000	0.155	0.000	0.800	0.246	0.862
HADHB	PCCB	9606.ENSP00000325136	9606.ENSP00000419027	0.093	0.000	0.000	0.000	0.112	0.116	0.900	0.241	0.936
HADHB	PCCA	9606.ENSP00000325136	9606.ENSP00000365462	0.078	0.000	0.000	0.000	0.087	0.228	0.900	0.230	0.940
HADHB	HMGCL	9606.ENSP00000325136	9606.ENSP00000363614	0.049	0.000	0.000	0.000	0.099	0.000	0.900	0.425	0.944
HADHB	HMGCS2	9606.ENSP00000325136	9606.ENSP00000358414	0.093	0.000	0.000	0.000	0.145	0.345	0.900	0.542	0.972
HAGH	LDHD	9606.ENSP00000380514	9606.ENSP00000300051	0.000	0.000	0.000	0.000	0.062	0.000	0.900	0.146	0.912
HAO1	MLYCD	9606.ENSP00000368066	9606.ENSP00000262430	0.049	0.000	0.000	0.000	0.062	0.000	0.900	0.449	0.944
HAO1	HOGA1	9606.ENSP00000368066	9606.ENSP00000359680	0.148	0.000	0.000	0.000	0.158	0.000	0.900	0.155	0.931
HAO1	HMGCL	9606.ENSP00000368066	9606.ENSP00000363614	0.051	0.000	0.000	0.000	0.063	0.056	0.900	0.233	0.923
HAO1	HAO2	9606.ENSP00000368066	9606.ENSP00000483507	0.000	0.000	0.449	0.939	0.299	0.000	0.900	0.955	0.932
HAO2	MLYCD	9606.ENSP00000483507	9606.ENSP00000262430	0.049	0.000	0.000	0.000	0.000	0.000	0.900	0.507	0.949
HAO2	HOGA1	9606.ENSP00000483507	9606.ENSP00000359680	0.148	0.000	0.000	0.000	0.158	0.000	0.900	0.134	0.929
HAO2	HMGCL	9606.ENSP00000483507	9606.ENSP00000363614	0.051	0.000	0.000	0.000	0.063	0.056	0.900	0.161	0.916
HIBADH	TKT	9606.ENSP00000265395	9606.ENSP00000391481	0.043	0.000	0.000	0.000	0.000	0.726	0.000	0.055	0.730
HIBADH	IVD	9606.ENSP00000265395	9606.ENSP00000418397	0.053	0.000	0.000	0.000	0.146	0.139	0.000	0.763	0.813
HIBADH	MCCC2	9606.ENSP00000265395	9606.ENSP00000343657	0.079	0.000	0.000	0.000	0.520	0.386	0.000	0.523	0.853
HIBADH	PCCA	9606.ENSP00000265395	9606.ENSP00000365462	0.042	0.000	0.000	0.000	0.133	0.000	0.800	0.428	0.892
HIBADH	PCCB	9606.ENSP00000265395	9606.ENSP00000419027	0.079	0.000	0.000	0.000	0.153	0.220	0.800	0.460	0.922
HMGCL	MLYCD	9606.ENSP00000363614	9606.ENSP00000262430	0.052	0.000	0.000	0.000	0.077	0.000	0.900	0.196	0.920
HMGCL	MCCC2	9606.ENSP00000363614	9606.ENSP00000343657	0.167	0.066	0.285	0.000	0.166	0.272	0.000	0.494	0.789
HMGCL	HMGCS2	9606.ENSP00000363614	9606.ENSP00000358414	0.000	0.000	0.000	0.000	0.062	0.000	0.900	0.734	0.972
HMGCL	SUCLG2	9606.ENSP00000363614	9606.ENSP00000419325	0.000	0.000	0.000	0.000	0.064	0.116	0.800	0.158	0.842
HMGCS2	SUCLG2	9606.ENSP00000358414	9606.ENSP00000419325	0.000	0.000	0.000	0.000	0.063	0.000	0.800	0.136	0.824
HPD	PAH	9606.ENSP00000289004	9606.ENSP00000448059	0.111	0.000	0.202	0.000	0.266	0.000	0.000	0.557	0.738
HSD17B6	UGT2B10	9606.ENSP00000451406	9606.ENSP00000265403	0.000	0.000	0.000	0.000	0.077	0.000	0.650	0.173	0.709
HSD17B6	UGT2B7	9606.ENSP00000451406	9606.ENSP00000304811	0.000	0.000	0.000	0.000	0.077	0.000	0.650	0.208	0.721
HSD17B6	UGT2B4	9606.ENSP00000451406	9606.ENSP00000305221	0.000	0.000	0.000	0.000	0.077	0.000	0.650	0.208	0.721
HSD17B6	UGT2B17	9606.ENSP00000451406	9606.ENSP00000320401	0.000	0.000	0.000	0.000	0.077	0.000	0.650	0.242	0.733
HSD17B6	UGT2B28	9606.ENSP00000451406	9606.ENSP00000334276	0.000	0.000	0.000	0.000	0.077	0.000	0.650	0.339	0.767
HSD17B6	UGT2B11	9606.ENSP00000451406	9606.ENSP00000387683	0.000	0.000	0.000	0.000	0.077	0.000	0.650	0.294	0.752
IDH2	SDHA	9606.ENSP00000331897	9606.ENSP00000264932	0.098	0.000	0.000	0.000	0.137	0.056	0.000	0.738	0.782
IDH2	PKM	9606.ENSP00000331897	9606.ENSP00000320171	0.155	0.000	0.000	0.000	0.087	0.141	0.000	0.613	0.709
IDH2	NIT2	9606.ENSP00000331897	9606.ENSP00000377696	0.059	0.000	0.000	0.000	0.062	0.000	0.800	0.082	0.816
IDH2	OGDHL	9606.ENSP00000331897	9606.ENSP00000363216	0.000	0.000	0.000	0.000	0.229	0.000	0.900	0.526	0.960
IDNK	RGN	9606.ENSP00000365601	9606.ENSP00000380365	0.247	0.000	0.000	0.000	0.062	0.000	0.900	0.485	0.958
IDO2	KYNU	9606.ENSP00000443432	9606.ENSP00000264170	0.000	0.000	0.000	0.000	0.148	0.000	0.900	0.688	0.971
IDO2	KMO	9606.ENSP00000443432	9606.ENSP00000355517	0.000	0.000	0.000	0.000	0.117	0.000	0.000	0.714	0.736
IDO2	TDO2	9606.ENSP00000443432	9606.ENSP00000444788	0.000	0.000	0.000	0.000	0.066	0.000	0.800	0.915	0.982
IVD	MCCC1	9606.ENSP00000418397	9606.ENSP00000265594	0.071	0.000	0.000	0.000	0.457	0.162	0.900	0.623	0.981
IVD	MCCC2	9606.ENSP00000418397	9606.ENSP00000343657	0.071	0.004	0.264	0.000	0.654	0.000	0.900	0.756	0.993
IVD	PCCA	9606.ENSP00000418397	9606.ENSP00000365462	0.071	0.000	0.000	0.000	0.457	0.140	0.000	0.573	0.790
IVD	PCCB	9606.ENSP00000418397	9606.ENSP00000419027	0.071	0.000	0.000	0.000	0.520	0.000	0.000	0.698	0.853
KMO	KYNU	9606.ENSP00000355517	9606.ENSP00000264170	0.185	0.772	0.395	0.000	0.425	0.000	0.900	0.950	0.999
KMO	TDO2	9606.ENSP00000355517	9606.ENSP00000444788	0.180	0.000	0.000	0.000	0.112	0.000	0.000	0.931	0.945
KYNU	TDO2	9606.ENSP00000264170	9606.ENSP00000444788	0.295	0.000	0.274	0.000	0.108	0.000	0.900	0.920	0.995
LDHD	ME2	9606.ENSP00000300051	9606.ENSP00000321070	0.047	0.000	0.000	0.000	0.000	0.000	0.900	0.067	0.903
LDHD	PC	9606.ENSP00000300051	9606.ENSP00000377532	0.000	0.000	0.000	0.000	0.131	0.000	0.900	0.283	0.932
LDHD	PKM	9606.ENSP00000300051	9606.ENSP00000320171	0.050	0.000	0.000	0.000	0.049	0.058	0.900	0.356	0.935
MAT1A	MTR	9606.ENSP00000361287	9606.ENSP00000355536	0.135	0.000	0.000	0.000	0.066	0.000	0.900	0.749	0.977
MCCC1	MUT	9606.ENSP00000265594	9606.ENSP00000274813	0.219	0.000	0.000	0.000	0.275	0.346	0.000	0.500	0.790
MCCC1	PCCA	9606.ENSP00000265594	9606.ENSP00000365462	0.000	0.000	0.444	0.874	0.064	0.400	0.600	0.946	0.796
MCCC1	PCCB	9606.ENSP00000265594	9606.ENSP00000419027	0.167	0.067	0.000	0.000	0.523	0.525	0.600	0.681	0.972
MCCC1	MCCC2	9606.ENSP00000265594	9606.ENSP00000343657	0.167	0.134	0.000	0.000	0.503	0.968	0.800	0.933	0.999
MCCC2	PC	9606.ENSP00000343657	9606.ENSP00000377532	0.217	0.026	0.000	0.000	0.062	0.000	0.600	0.379	0.793
MCCC2	PCCA	9606.ENSP00000343657	9606.ENSP00000365462	0.167	0.125	0.000	0.000	0.499	0.705	0.600	0.612	0.979
MCEE	MMAB	9606.ENSP00000244217	9606.ENSP00000445920	0.000	0.000	0.000	0.000	0.000	0.000	0.000	0.801	0.801
MCEE	PCCA	9606.ENSP00000244217	9606.ENSP00000365462	0.135	0.000	0.000	0.000	0.063	0.000	0.900	0.771	0.978
MCEE	PCCB	9606.ENSP00000244217	9606.ENSP00000419027	0.135	0.000	0.300	0.000	0.073	0.000	0.900	0.787	0.985
MCEE	MUT	9606.ENSP00000244217	9606.ENSP00000274813	0.185	0.000	0.426	0.000	0.076	0.000	0.900	0.829	0.991
ME2	PKM	9606.ENSP00000321070	9606.ENSP00000320171	0.129	0.000	0.000	0.000	0.068	0.000	0.900	0.399	0.944
ME2	PC	9606.ENSP00000321070	9606.ENSP00000377532	0.000	0.000	0.000	0.000	0.072	0.094	0.900	0.542	0.956
MMAB	MUT	9606.ENSP00000445920	9606.ENSP00000274813	0.292	0.000	0.000	0.000	0.000	0.000	0.000	0.946	0.960
MMAB	PCCA	9606.ENSP00000445920	9606.ENSP00000365462	0.000	0.000	0.000	0.000	0.000	0.000	0.000	0.708	0.708
MMAB	PCCB	9606.ENSP00000445920	9606.ENSP00000419027	0.000	0.000	0.000	0.000	0.000	0.000	0.000	0.761	0.761
MTHFD1	PC	9606.ENSP00000216605	9606.ENSP00000377532	0.000	0.000	0.000	0.000	0.110	0.616	0.000	0.399	0.776
MTHFD1	PSAT1	9606.ENSP00000216605	9606.ENSP00000365773	0.000	0.000	0.000	0.000	0.158	0.562	0.000	0.497	0.798
MTHFD1	MTHFD1L	9606.ENSP00000216605	9606.ENSP00000478253	0.000	0.000	0.448	0.963	0.099	0.000	0.900	0.910	0.910
MTHFD1	MTR	9606.ENSP00000216605	9606.ENSP00000355536	0.041	0.000	0.000	0.000	0.062	0.000	0.900	0.851	0.984
MTHFD1	SHMT2	9606.ENSP00000216605	9606.ENSP00000333667	0.167	0.000	0.000	0.000	0.206	0.532	0.900	0.826	0.993
MTHFD1	SHMT1	9606.ENSP00000216605	9606.ENSP00000318868	0.167	0.000	0.000	0.000	0.173	0.532	0.900	0.909	0.996
MTHFD1L	SHMT1	9606.ENSP00000478253	9606.ENSP00000318868	0.167	0.000	0.000	0.000	0.143	0.532	0.900	0.788	0.991
MTHFD1L	SHMT2	9606.ENSP00000478253	9606.ENSP00000333667	0.167	0.000	0.000	0.000	0.201	0.532	0.900	0.792	0.992
MTHFD1L	MTR	9606.ENSP00000478253	9606.ENSP00000355536	0.041	0.000	0.000	0.000	0.062	0.000	0.900	0.659	0.965
MTHFD1L	PSAT1	9606.ENSP00000478253	9606.ENSP00000365773	0.000	0.000	0.000	0.000	0.205	0.562	0.000	0.500	0.811
MTR	SDS	9606.ENSP00000355536	9606.ENSP00000257549	0.068	0.000	0.000	0.000	0.083	0.000	0.800	0.244	0.853
MTR	MUT	9606.ENSP00000355536	9606.ENSP00000274813	0.000	0.000	0.000	0.000	0.062	0.000	0.000	0.843	0.846
MTR	SHMT1	9606.ENSP00000355536	9606.ENSP00000318868	0.049	0.000	0.000	0.000	0.062	0.000	0.900	0.834	0.983
MTR	SHMT2	9606.ENSP00000355536	9606.ENSP00000333667	0.049	0.000	0.000	0.000	0.062	0.000	0.900	0.731	0.972
MTR	PCCA	9606.ENSP00000355536	9606.ENSP00000365462	0.000	0.000	0.000	0.000	0.062	0.000	0.000	0.703	0.710
MTR	SDSL	9606.ENSP00000355536	9606.ENSP00000385790	0.068	0.000	0.000	0.000	0.083	0.000	0.800	0.245	0.853
MUT	PCK2	9606.ENSP00000274813	9606.ENSP00000216780	0.000	0.000	0.000	0.000	0.062	0.000	0.800	0.163	0.829
MUT	PCK1	9606.ENSP00000274813	9606.ENSP00000319814	0.000	0.000	0.000	0.000	0.062	0.000	0.800	0.146	0.825
MUT	PC	9606.ENSP00000274813	9606.ENSP00000377532	0.000	0.000	0.000	0.000	0.063	0.000	0.800	0.449	0.887
MUT	PCCA	9606.ENSP00000274813	9606.ENSP00000365462	0.219	0.000	0.000	0.000	0.146	0.392	0.000	0.848	0.930
MUT	PCCB	9606.ENSP00000274813	9606.ENSP00000419027	0.219	0.000	0.306	0.000	0.066	0.247	0.000	0.868	0.940
MUT	SUCLG2	9606.ENSP00000274813	9606.ENSP00000419325	0.083	0.000	0.000	0.000	0.104	0.369	0.900	0.235	0.953
NIT2	PCK2	9606.ENSP00000377696	9606.ENSP00000216780	0.000	0.000	0.000	0.000	0.066	0.000	0.800	0.058	0.808
NIT2	SORD	9606.ENSP00000377696	9606.ENSP00000267814	0.000	0.000	0.000	0.000	0.045	0.679	0.000	0.123	0.707
NIT2	PCK1	9606.ENSP00000377696	9606.ENSP00000319814	0.000	0.000	0.000	0.000	0.066	0.000	0.800	0.058	0.808
NIT2	OGDHL	9606.ENSP00000377696	9606.ENSP00000363216	0.000	0.000	0.000	0.000	0.000	0.000	0.800	0.053	0.802
NIT2	PC	9606.ENSP00000377696	9606.ENSP00000377532	0.000	0.000	0.000	0.000	0.073	0.000	0.800	0.049	0.808
NME1	PKM	9606.ENSP00000337060	9606.ENSP00000320171	0.000	0.000	0.000	0.000	0.104	0.000	0.800	0.186	0.841
NME1	PHGDH	9606.ENSP00000337060	9606.ENSP00000358417	0.000	0.000	0.000	0.000	0.098	0.675	0.000	0.137	0.724
NME1	NME7	9606.ENSP00000337060	9606.ENSP00000356785	0.000	0.000	0.391	0.748	0.000	0.000	0.800	0.729	0.851
NME1	NME1-NME2	9606.ENSP00000337060	9606.ENSP00000376886	0.000	0.000	0.449	0.982	0.425	0.672	0.800	0.930	0.960
NME1-NME2	PKM	9606.ENSP00000376886	9606.ENSP00000320171	0.000	0.000	0.000	0.000	0.104	0.000	0.800	0.199	0.844
NME1-NME2	NME7	9606.ENSP00000376886	9606.ENSP00000356785	0.000	0.000	0.394	0.777	0.000	0.000	0.800	0.509	0.836
NME1-NME2	PHGDH	9606.ENSP00000376886	9606.ENSP00000358417	0.000	0.000	0.000	0.000	0.079	0.675	0.000	0.081	0.701
NME7	PKM	9606.ENSP00000356785	9606.ENSP00000320171	0.000	0.000	0.000	0.000	0.064	0.000	0.800	0.111	0.819
OGDHL	SDHA	9606.ENSP00000363216	9606.ENSP00000264932	0.185	0.000	0.000	0.000	0.466	0.255	0.000	0.570	0.842
OGDHL	SUCLG2	9606.ENSP00000363216	9606.ENSP00000419325	0.111	0.000	0.000	0.000	0.255	0.105	0.540	0.376	0.799
PC	PCK2	9606.ENSP00000377532	9606.ENSP00000216780	0.000	0.000	0.000	0.000	0.065	0.000	0.900	0.819	0.981
PC	PCK1	9606.ENSP00000377532	9606.ENSP00000319814	0.000	0.000	0.000	0.000	0.065	0.000	0.900	0.816	0.981
PC	PKM	9606.ENSP00000377532	9606.ENSP00000320171	0.000	0.000	0.000	0.000	0.094	0.189	0.900	0.709	0.975
PC	PCCB	9606.ENSP00000377532	9606.ENSP00000419027	0.217	0.046	0.000	0.000	0.064	0.000	0.600	0.439	0.814
PCCA	PCCB	9606.ENSP00000365462	9606.ENSP00000419027	0.167	0.061	0.000	0.000	0.511	0.939	0.800	0.962	0.999
PCK1	PCK2	9606.ENSP00000319814	9606.ENSP00000216780	0.000	0.000	0.449	0.976	0.062	0.229	0.800	0.740	0.847
PCK1	PKM	9606.ENSP00000319814	9606.ENSP00000320171	0.000	0.000	0.000	0.000	0.062	0.000	0.900	0.557	0.954
PCK2	PKM	9606.ENSP00000216780	9606.ENSP00000320171	0.000	0.000	0.000	0.000	0.062	0.000	0.900	0.567	0.955
PGK1	SORD	9606.ENSP00000362413	9606.ENSP00000267814	0.000	0.000	0.000	0.000	0.062	0.609	0.000	0.465	0.786
PGK1	PKM	9606.ENSP00000362413	9606.ENSP00000320171	0.167	0.000	0.000	0.000	0.577	0.423	0.000	0.805	0.955
PGK1	PGM1	9606.ENSP00000362413	9606.ENSP00000360124	0.000	0.000	0.000	0.000	0.515	0.000	0.000	0.579	0.787
PGK1	TKT	9606.ENSP00000362413	9606.ENSP00000391481	0.135	0.000	0.000	0.000	0.161	0.272	0.000	0.632	0.780
PGM1	PYGM	9606.ENSP00000360124	9606.ENSP00000164139	0.135	0.000	0.000	0.000	0.520	0.056	0.900	0.559	0.979
PGM1	PYGL	9606.ENSP00000360124	9606.ENSP00000216392	0.135	0.000	0.000	0.000	0.520	0.056	0.900	0.600	0.981
PGM1	PYGB	9606.ENSP00000360124	9606.ENSP00000216962	0.135	0.000	0.000	0.000	0.520	0.056	0.900	0.507	0.977
PGM1	TREH	9606.ENSP00000360124	9606.ENSP00000264029	0.093	0.000	0.000	0.000	0.650	0.000	0.000	0.461	0.814
PGM1	SORD	9606.ENSP00000360124	9606.ENSP00000267814	0.000	0.000	0.000	0.000	0.084	0.679	0.000	0.449	0.823
PGM1	UGP2	9606.ENSP00000360124	9606.ENSP00000338703	0.000	0.238	0.000	0.000	0.510	0.000	0.900	0.788	0.991
PGM2L1	PYGM	9606.ENSP00000298198	9606.ENSP00000164139	0.111	0.000	0.000	0.000	0.067	0.000	0.900	0.187	0.923
PGM2L1	PYGL	9606.ENSP00000298198	9606.ENSP00000216392	0.111	0.000	0.000	0.000	0.067	0.000	0.900	0.289	0.933
PGM2L1	PYGB	9606.ENSP00000298198	9606.ENSP00000216962	0.111	0.000	0.000	0.000	0.067	0.000	0.900	0.187	0.923
PGM2L1	PHGDH	9606.ENSP00000298198	9606.ENSP00000358417	0.055	0.000	0.000	0.000	0.083	0.726	0.000	0.053	0.745
PGM2L1	UGP2	9606.ENSP00000298198	9606.ENSP00000338703	0.070	0.000	0.000	0.000	0.084	0.243	0.900	0.460	0.958
PHGDH	SHMT1	9606.ENSP00000358417	9606.ENSP00000318868	0.075	0.000	0.000	0.000	0.062	0.102	0.000	0.722	0.754
PHGDH	SHMT2	9606.ENSP00000358417	9606.ENSP00000333667	0.075	0.000	0.000	0.000	0.190	0.102	0.000	0.755	0.813
PHGDH	TKT	9606.ENSP00000358417	9606.ENSP00000391481	0.074	0.000	0.000	0.000	0.094	0.731	0.000	0.333	0.829
PHGDH	PSAT1	9606.ENSP00000358417	9606.ENSP00000365773	0.185	0.000	0.000	0.000	0.941	0.272	0.900	0.933	0.999
PKM	TKT	9606.ENSP00000320171	9606.ENSP00000391481	0.135	0.000	0.000	0.000	0.172	0.271	0.800	0.679	0.960
PSAT1	SHMT1	9606.ENSP00000365773	9606.ENSP00000318868	0.047	0.000	0.000	0.000	0.125	0.107	0.000	0.801	0.832
PSAT1	SHMT2	9606.ENSP00000365773	9606.ENSP00000333667	0.047	0.000	0.000	0.000	0.247	0.107	0.000	0.814	0.865
PYCR1	PYCR2	9606.ENSP00000384949	9606.ENSP00000342502	0.000	0.000	0.449	0.981	0.156	0.872	0.800	0.819	0.977
PYGB	PYGM	9606.ENSP00000216962	9606.ENSP00000164139	0.000	0.000	0.449	0.983	0.062	0.658	0.800	0.674	0.931
PYGB	PYGL	9606.ENSP00000216962	9606.ENSP00000216392	0.000	0.000	0.449	0.982	0.072	0.854	0.800	0.708	0.971
PYGB	UGP2	9606.ENSP00000216962	9606.ENSP00000338703	0.000	0.000	0.000	0.000	0.219	0.000	0.900	0.638	0.969
PYGL	PYGM	9606.ENSP00000216392	9606.ENSP00000164139	0.000	0.000	0.449	0.982	0.000	0.664	0.800	0.653	0.931
PYGL	UGP2	9606.ENSP00000216392	9606.ENSP00000338703	0.000	0.000	0.000	0.000	0.215	0.000	0.900	0.684	0.973
PYGM	UGP2	9606.ENSP00000164139	9606.ENSP00000338703	0.000	0.000	0.000	0.000	0.215	0.000	0.900	0.553	0.961
RPIA	TKT	9606.ENSP00000283646	9606.ENSP00000391481	0.185	0.000	0.000	0.000	0.087	0.744	0.900	0.899	0.997
SDHA	SUCLG2	9606.ENSP00000264932	9606.ENSP00000419325	0.185	0.000	0.000	0.000	0.349	0.546	0.900	0.500	0.985
SDS	SDSL	9606.ENSP00000257549	9606.ENSP00000385790	0.000	0.000	0.447	0.960	0.063	0.000	0.800	0.456	0.811
SDS	SHMT1	9606.ENSP00000257549	9606.ENSP00000318868	0.000	0.000	0.000	0.000	0.064	0.000	0.900	0.662	0.965
SDS	SHMT2	9606.ENSP00000257549	9606.ENSP00000333667	0.000	0.000	0.000	0.000	0.064	0.000	0.900	0.673	0.966
SDSL	SHMT1	9606.ENSP00000385790	9606.ENSP00000318868	0.000	0.000	0.000	0.000	0.064	0.000	0.900	0.453	0.944
SDSL	SHMT2	9606.ENSP00000385790	9606.ENSP00000333667	0.000	0.000	0.000	0.000	0.064	0.000	0.900	0.415	0.940
SHMT1	SHMT2	9606.ENSP00000318868	9606.ENSP00000333667	0.000	0.000	0.448	0.966	0.084	0.272	0.800	0.842	0.861
SORD	TKT	9606.ENSP00000267814	9606.ENSP00000391481	0.078	0.000	0.000	0.000	0.076	0.216	0.000	0.625	0.716
TKT	TPK1	9606.ENSP00000391481	9606.ENSP00000353165	0.000	0.000	0.000	0.000	0.000	0.000	0.000	0.934	0.934
TREH	UGP2	9606.ENSP00000264029	9606.ENSP00000338703	0.000	0.000	0.000	0.000	0.065	0.149	0.000	0.755	0.788
UGT2B10	UGT2B11	9606.ENSP00000265403	9606.ENSP00000387683	0.000	0.000	0.000	0.984	0.829	0.000	0.000	0.664	0.830
UGT2B11	UGT2B7	9606.ENSP00000387683	9606.ENSP00000304811	0.000	0.000	0.000	0.983	0.746	0.000	0.000	0.562	0.748
A total of 201 nodes and 1,132 edges were predicted under the condition of 0.700 confidence.
Table SVIII. Protein interaction analysis of carbohydrate-associated differentially expressed genes based on the STRING database.
Average shortest path length	Betweenness centrality	Closeness centrality	Clustering coefficient	Degree	Eccentricity	Is single node	Gene	Neighborhood connectivity	Number of directed edges	Number of undirected edges	Partner of multi edged node pairs	Radiality	Selected	Self loops	Shared name	Stress	Topological coefficient
2.257575758	0.035053381	0.442953020	0.368421053	39	4	False	EHHADH	21.487179490	0	39	0	0.967754468	False	0	EHHADH	20474	0.180564534
2.090909091	0.075503222	0.478260870	0.264507422	39	4	False	AGXT2	20.000000000	0	39	0	0.972027972	False	0	AGXT2	23462	0.137754200
2.080808081	0.102893087	0.480582524	0.187766714	38	4	False	GOT2	15.657894740	0	38	0	0.972286972	False	0	GOT2	32078	0.106516291
2.020202020	0.094610329	0.495000000	0.318634424	38	3	False	ALDH6A1	22.552631580	0	38	0	0.973840974	False	0	ALDH6A1	38548	0.144568151
2.055555556	0.083337791	0.486486486	0.164772727	33	4	False	ALDH7A1	19.393939390	0	33	0	0.972934473	False	0	ALDH7A1	36490	0.123543124
2.277777778	0.027654272	0.439024390	0.381048387	32	4	False	DBT	22.562500000	0	32	0	0.967236467	False	0	DBT	13318	0.183434959
2.333333333	0.047049162	0.428571429	0.417204301	31	4	False	ACADS	22.161290320	0	31	0	0.965811966	False	0	ACADS	14924	0.202130808
2.348484848	0.011424017	0.425806452	0.468965517	30	4	False	ACOX1	23.666666670	0	30	0	0.965423465	False	0	ACOX1	6770	0.205797101
2.161616162	0.035574773	0.462616822	0.369458128	29	4	False	ABAT	23.034482760	0	29	0	0.970214970	False	0	ABAT	15128	0.161080299
2.358585859	0.008112620	0.423982869	0.510582011	28	4	False	ACOX3	24.714285710	0	28	0	0.965164465	False	0	ACOX3	5062	0.214906832
2.414141414	0.087360326	0.414225941	0.211640212	28	4	False	AOX1	16.535714290	0	28	0	0.963739964	False	0	AOX1	28658	0.157623626
2.323232323	0.032254029	0.430434783	0.225071225	27	4	False	GOT1	14.037037040	0	27	0	0.966070966	False	0	GOT1	11352	0.118957941
2.308080808	0.023625915	0.433260394	0.376068376	27	4	False	PCCA	21.851851850	0	27	0	0.966459466	False	0	PCCA	8770	0.177657332
2.202020202	0.041085000	0.454128440	0.276353276	27	4	False	AGXT	17.925925930	0	27	0	0.969178969	False	0	AGXT	11514	0.133775567
2.611111111	0.007629441	0.382978723	0.456666667	25	4	False	ACAT1	19.480000000	0	25	0	0.958689459	False	0	ACAT1	2984	0.240493827
2.237373737	0.020998200	0.446952596	0.296666667	25	4	False	ALDH2	21.200000000	0	25	0	0.968272468	False	0	ALDH2	15734	0.159398496
2.282828283	0.017741588	0.438053097	0.320000000	25	4	False	ALDH3A2	21.320000000	0	25	0	0.967106967	False	0	ALDH3A2	13888	0.170560000
2.262626263	0.062093728	0.441964286	0.143333333	25	4	False	ALDH18A1	15.840000000	0	25	0	0.967624968	False	0	ALDH18A1	21786	0.129508197
2.207070707	0.017671640	0.453089245	0.496376812	24	4	False	HIBADH	26.208333330	0	24	0	0.969049469	False	0	HIBADH	9144	0.187202381
2.247474747	0.026868874	0.444943820	0.199275362	24	4	False	ALDH9A1	21.000000000	0	24	0	0.968013468	False	0	ALDH9A1	17896	0.162434896
2.252525253	0.019159248	0.443946188	0.311594203	24	4	False	ALDH1B1	21.208333330	0	24	0	0.967883968	False	0	ALDH1B1	14668	0.160669192
2.373737374	0.017227040	0.421276596	0.470355731	23	4	False	PCCB	23.043478260	0	23	0	0.964775965	False	0	PCCB	6392	0.198650675
2.565656566	0.004438537	0.389763780	0.573122530	23	4	False	ACAA1	22.478260870	0	23	0	0.959854960	False	0	ACAA1	2806	0.264450128
2.621212121	0.003326187	0.381502890	0.581027668	23	4	False	ACAA2	22.000000000	0	23	0	0.958430458	False	0	ACAA2	2566	0.282051282
2.631313131	0.007466233	0.380038388	0.545454545	23	4	False	ECHS1	20.869565220	0	23	0	0.958171458	False	0	ECHS1	3132	0.270468662
2.707070707	0.003636101	0.369402985	0.545454545	22	4	False	ACAT2	20.090909090	0	22	0	0.956228956	False	0	ACAT2	1860	0.282970551
2.702020202	0.031362377	0.370093458	0.246753247	22	4	False	PKM	10.909090910	0	22	0	0.956358456	False	0	PKM	8946	0.144848485
2.545454545	0.025857123	0.392857143	0.376190476	21	4	False	HMGCL	18.238095240	0	21	0	0.960372960	False	0	HMGCL	8428	0.199895343
2.641414141	0.002343868	0.378585086	0.652380952	21	4	False	HADHB	22.904761900	0	21	0	0.957912458	False	0	HADHB	1802	0.297464440
2.308080808	0.030494607	0.433260394	0.263157895	20	4	False	CAT	19.800000000	0	20	0	0.966459466	False	0	CAT	9630	0.160569106
2.469696970	0.023270081	0.404907975	0.268421053	20	4	False	ALDH4A1	17.550000000	0	20	0	0.962315462	False	0	ALDH4A1	10340	0.175500000
2.267676768	0.024979365	0.440979955	0.286549708	19	3	False	PHGDH	19.315789470	0	19	0	0.967495467	False	0	PHGDH	9882	0.154105263
2.595959596	0.012006978	0.385214008	0.189542484	18	5	False	ACSF3	18.500000000	0	18	0	0.959077959	False	0	ACSF3	5210	0.201086957
2.686868687	0.001696028	0.372180451	0.633986928	18	4	False	ACADSB	23.666666670	0	18	0	0.956746957	False	0	ACADSB	1252	0.319819820
2.878787879	0.001062315	0.347368421	0.581699346	18	5	False	HADHA	20.611111110	0	18	0	0.951825952	False	0	HADHA	602	0.355363985
2.994949495	0.052250014	0.333895447	0.241830065	18	5	False	ENPP1	8.000000000	0	18	0	0.948847449	False	0	ENPP1	12554	0.165484634
2.292929293	0.042511711	0.436123348	0.287581699	18	4	False	TKT	17.333333330	0	18	0	0.966847967	False	0	TKT	11824	0.141621129
2.641414141	0.005276138	0.378585086	0.389705882	17	5	False	BCKDHB	17.941176470	0	17	0	0.957912458	False	0	BCKDHB	2406	0.211072664
2.424242424	0.031629096	0.412500000	0.227941176	17	4	False	PC	14.529411760	0	17	0	0.963480963	False	0	PC	9338	0.135960044
2.565656566	0.010971479	0.389763780	0.411764706	17	4	False	SHMT2	15.294117650	0	17	0	0.959854960	False	0	SHMT2	5094	0.177838577
2.565656566	0.010971479	0.389763780	0.411764706	17	4	False	SHMT1	15.294117650	0	17	0	0.959854960	False	0	SHMT1	5094	0.177838577
2.636363636	0.018631055	0.379310345	0.323529412	17	4	False	ENO3	14.294117650	0	17	0	0.958041958	False	0	ENO3	6012	0.165526676
2.530303030	0.008647964	0.395209581	0.350000000	16	5	False	CNDP2	19.875000000	0	16	0	0.960761461	False	0	CNDP2	4322	0.207031250
2.702020202	0.006856604	0.370093458	0.325000000	16	4	False	SUCLG2	16.812500000	0	16	0	0.956358456	False	0	SUCLG2	2048	0.220394737
2.747474747	0.011839595	0.363970588	0.425000000	16	4	False	CAD	14.000000000	0	16	0	0.955192955	False	0	CAD	3188	0.196302817
2.585858586	0.021571737	0.386718750	0.283333333	16	4	False	GAPDH	13.437500000	0	16	0	0.959336959	False	0	GAPDH	6074	0.153343023
2.691919192	0.007182848	0.371482176	0.561904762	15	4	False	HADH	21.933333330	0	15	0	0.956617457	False	0	HADH	3308	0.295495495
2.631313131	0.003032140	0.380038388	0.542857143	15	4	False	MLYCD	21.400000000	0	15	0	0.958171458	False	0	MLYCD	1010	0.260975610
2.656565657	0.010364156	0.376425856	0.342857143	15	4	False	GLS2	13.600000000	0	15	0	0.957523958	False	0	GLS2	4014	0.170000000
2.565656566	0.019170997	0.389763780	0.395604396	14	5	False	UPB1	20.142857140	0	14	0	0.959854960	False	0	UPB1	5812	0.215821813
2.449494949	0.041048309	0.408247423	0.241758242	14	4	False	PGM1	15.714285710	0	14	0	0.962833463	False	0	PGM1	17454	0.152565881
2.742424242	0.002997389	0.364640884	0.472527473	14	5	False	BCKDHA	18.214285710	0	14	0	0.955322455	False	0	BCKDHA	1626	0.236549165
2.818181818	0.018929727	0.354838710	0.472527473	14	4	False	ASPA	14.714285710	0	14	0	0.953379953	False	0	ASPA	6424	0.231292517
2.727272727	0.019867776	0.366666667	0.109890110	14	4	False	ADH4	14.500000000	0	14	0	0.955710956	False	0	ADH4	14056	0.240920097
2.712121212	0.006759282	0.368715084	0.516483516	14	4	False	ADSSL1	15.000000000	0	14	0	0.956099456	False	0	ADSSL1	2504	0.208333333
2.712121212	0.006759282	0.368715084	0.516483516	14	4	False	ADSS	15.000000000	0	14	0	0.956099456	False	0	ADSS	2504	0.208333333
2.792929293	0.007000684	0.358047016	0.516483516	14	4	False	ASS1	14.928571430	0	14	0	0.954027454	False	0	ASS1	2588	0.222814499
2.580808081	0.003669169	0.387475538	0.505494505	14	4	False	SDS	18.500000000	0	14	0	0.959466459	False	0	SDS	1946	0.217647059
2.580808081	0.003669169	0.387475538	0.505494505	14	4	False	SDSL	18.500000000	0	14	0	0.959466459	False	0	SDSL	1946	0.217647059
2.722222222	0.024059822	0.367346939	0.274725275	14	5	False	GCSH	14.785714290	0	14	0	0.955840456	False	0	GCSH	6680	0.195238095
2.823232323	0.006123445	0.354203936	0.351648352	14	4	False	GLS	12.928571430	0	14	0	0.953250453	False	0	GLS	2242	0.195887446
2.611111111	0.017880949	0.382978723	0.285714286	14	4	False	GLYCTK	17.714285710	0	14	0	0.958689459	False	0	GLYCTK	9750	0.230263158
2.510101010	0.007196201	0.398390342	0.384615385	13	4	False	OGDHL	17.538461540	0	13	0	0.961279461	False	0	OGDHL	2748	0.188585608
2.474747475	0.002729712	0.404081633	0.525641026	13	4	False	GPT	22.153846150	0	13	0	0.962185962	False	0	GPT	1264	0.223776224
2.676767677	0.012217324	0.373584906	0.346153846	13	4	False	ACOT12	20.384615380	0	13	0	0.957005957	False	0	ACOT12	4408	0.282051282
2.732323232	0.016023831	0.365988909	0.102564103	13	4	False	ADH6	15.384615380	0	13	0	0.955581456	False	0	ADH6	12928	0.255541069
2.727272727	0.012372257	0.366666667	0.269230769	13	5	False	ASL	12.230769230	0	13	0	0.955710956	False	0	ASL	3844	0.168803419
2.636363636	0.006113862	0.379310345	0.448717949	13	4	False	MCCC2	20.692307690	0	13	0	0.958041958	False	0	MCCC2	3368	0.257692308
2.666666667	0.005233047	0.375000000	0.393939394	12	5	False	BCAT1	17.500000000	0	12	0	0.957264957	False	0	BCAT1	1794	0.209839357
2.439393939	0.002078210	0.409937888	0.621212121	12	4	False	GPT2	24.750000000	0	12	0	0.963092463	False	0	GPT2	1042	0.229166667
2.626262626	0.002441618	0.380769231	0.606060606	12	4	False	HAO1	21.083333330	0	12	0	0.958300958	False	0	HAO1	818	0.256097561
2.732323232	0.005497968	0.365988909	0.348484848	12	4	False	IDH2	14.916666670	0	12	0	0.955581456	False	0	IDH2	1894	0.214975845
2.646464646	0.010685213	0.377862595	0.227272727	12	4	False	MUT	14.666666670	0	12	0	0.957782958	False	0	MUT	4128	0.176829268
2.747474747	0.006770594	0.363970588	0.257575758	12	4	False	ADH1A	16.833333330	0	12	0	0.955192955	False	0	ADH1A	5358	0.275956284
2.707070707	0.023257365	0.369402985	0.196969697	12	4	False	ADSL	13.500000000	0	12	0	0.956228956	False	0	ADSL	6636	0.167708333
2.686868687	0.004823259	0.372180451	0.409090909	12	4	False	PCK2	16.083333330	0	12	0	0.956746957	False	0	PCK2	2646	0.203586498
2.686868687	0.004823259	0.372180451	0.409090909	12	4	False	PCK1	16.083333330	0	12	0	0.956746957	False	0	PCK1	2646	0.203586498
2.823232323	0.003341445	0.354203936	0.606060606	12	4	False	ASNS	15.750000000	0	12	0	0.953250453	False	0	ASNS	764	0.244791667
2.752525253	0.003849876	0.363302752	0.500000000	12	5	False	GLDC	16.333333330	0	12	0	0.955063455	False	0	GLDC	1844	0.236714976
2.626262626	0.009863081	0.380769231	0.439393939	12	5	False	CTH	17.583333330	0	12	0	0.958300958	False	0	CTH	3396	0.209325397
2.727272727	0.023696223	0.366666667	0.090909091	12	4	False	AKR1B1	14.833333330	0	12	0	0.955710956	False	0	AKR1B1	11838	0.245762712
2.924242424	0.004199617	0.341968912	0.636363636	12	4	False	ALDOA	12.250000000	0	12	0	0.950660451	False	0	ALDOA	2584	0.245000000
2.924242424	0.004199617	0.341968912	0.636363636	12	4	False	ALDOC	12.250000000	0	12	0	0.950660451	False	0	ALDOC	2584	0.245000000
2.924242424	0.004199617	0.341968912	0.636363636	12	4	False	ALDOB	12.250000000	0	12	0	0.950660451	False	0	ALDOB	2584	0.245000000
2.873737374	0.006703447	0.347978910	0.393939394	12	5	False	MTR	12.666666670	0	12	0	0.951955452	False	0	MTR	2326	0.218390805
2.944444444	0.001572752	0.339622642	0.545454545	12	5	False	MCCC1	19.666666670	0	12	0	0.950142450	False	0	MCCC1	1176	0.322404372
2.878787879	0.001167648	0.347368421	0.636363636	12	5	False	IVD	20.666666670	0	12	0	0.951825952	False	0	IVD	1274	0.350282486
3.040404040	0.001639735	0.328903654	0.618181818	11	5	False	HMGCS2	19.000000000	0	11	0	0.947681948	False	0	HMGCS2	1060	0.345454545
2.722222222	0.001507315	0.367346939	0.600000000	11	5	False	CNDP1	21.727272730	0	11	0	0.955840456	False	0	CNDP1	1068	0.334265734
2.641414141	0.001125008	0.378585086	0.727272727	11	4	False	HAO2	22.636363640	0	11	0	0.957912458	False	0	HAO2	556	0.279461279
2.727272727	0.023534203	0.366666667	0.181818182	11	4	False	ESD	15.454545450	0	11	0	0.955710956	False	0	ESD	9328	0.226594301
2.752525253	0.004744696	0.363302752	0.290909091	11	4	False	ADH1C	18.090909090	0	11	0	0.955063455	False	0	ADH1C	4332	0.296572280
2.606060606	0.035606692	0.383720930	0.381818182	11	4	False	PGM2L1	15.272727270	0	11	0	0.958818959	False	0	PGM2L1	14574	0.188552189
3.060606061	0.010756076	0.326732673	0.690909091	11	5	False	AGL	11.000000000	0	11	0	0.947163947	False	0	AGL	5502	0.275000000
3.111111111	0.005164276	0.321428571	0.709090909	11	5	False	PYGM	11.545454550	0	11	0	0.945868946	False	0	PYGM	4162	0.274891775
3.111111111	0.005164276	0.321428571	0.709090909	11	5	False	PYGB	11.545454550	0	11	0	0.945868946	False	0	PYGB	4162	0.274891775
2.616161616	0.014238907	0.382239382	0.327272727	11	4	False	GRHPR	15.090909090	0	11	0	0.958559959	False	0	GRHPR	4284	0.205479452
3.196969697	0.003760253	0.312796209	0.690909091	11	5	False	UGP2	10.181818180	0	11	0	0.943667444	False	0	UGP2	3146	0.328445748
2.888888889	0.002644653	0.346153846	0.527272727	11	5	False	AMT	14.818181820	0	11	0	0.951566952	False	0	AMT	1330	0.242921013
2.595959596	0.004245793	0.385214008	0.327272727	11	5	False	GCLC	20.272727270	0	11	0	0.959077959	False	0	GCLC	1642	0.225252525
2.590909091	0.004857097	0.385964912	0.288888889	10	4	False	SORD	16.100000000	0	10	0	0.959207459	False	0	SORD	1674	0.195121951
3.050505051	0.000192000	0.327814570	0.688888889	10	5	False	ACADM	22.600000000	0	10	0	0.947422947	False	0	ACADM	116	0.418518519
3.202020202	0.002797563	0.312302839	0.822222222	10	5	False	PYGL	11.100000000	0	10	0	0.943537944	False	0	PYGL	3060	0.358064516
2.974747475	0.002212071	0.336162988	0.511111111	10	5	False	CBSL	13.500000000	0	10	0	0.949365449	False	0	CBSL	1006	0.281250000
2.914141414	0.001553772	0.343154246	0.644444444	10	4	False	PGK1	14.100000000	0	10	0	0.950919451	False	0	PGK1	430	0.261111111
2.984848485	0.003978093	0.335025381	0.444444444	9	5	False	AACS	17.000000000	0	9	0	0.949106449	False	0	AACS	1634	0.274193548
3.080808081	0.000244000	0.324590164	0.694444444	9	5	False	ACAD8	23.888888890	0	9	0	0.946645947	False	0	ACAD8	146	0.442386831
2.823232323	0.000222000	0.354203936	0.694444444	9	4	False	ACACA	20.555555560	0	9	0	0.953250453	False	0	ACACA	210	0.342592593
2.732323232	0.003198786	0.365988909	0.388888889	9	4	False	SDHA	15.333333330	0	9	0	0.955581456	False	0	SDHA	984	0.200292398
2.914141414	0.000000000	0.343154246	1.000000000	9	4	False	ASPDH	17.555555560	0	9	0	0.950919451	False	0	ASPDH	0	0.325102881
2.914141414	0.000000000	0.343154246	1.000000000	9	4	False	ASRGL1	17.555555560	0	9	0	0.950919451	False	0	ASRGL1	0	0.325102881
2.707070707	0.010494251	0.369402985	0.444444444	9	4	False	NME1	13.777777780	0	9	0	0.956228956	False	0	NME1	4902	0.205638474
2.702020202	0.009936290	0.370093458	0.444444444	9	4	False	NME1-NME2	13.888888890	0	9	0	0.956358456	False	0	NME1-NME2	4648	0.207296849
2.873737374	0.002894968	0.347978910	0.472222222	9	4	False	PSAT1	14.555555560	0	9	0	0.951955452	False	0	PSAT1	1452	0.246704331
3.045454545	0.013149745	0.328358209	0.357142857	8	4	False	HAAO	7.000000000	0	8	0	0.947552448	False	0	HAAO	2918	0.217741935
3.146464646	0.000000000	0.317817014	1.000000000	8	5	False	HSD17B10	24.250000000	0	8	0	0.944962445	False	0	HSD17B10	0	0.515957447
2.828282828	0.000187000	0.353571429	0.750000000	8	4	False	ACACB	19.500000000	0	8	0	0.953120953	False	0	ACACB	198	0.325000000
3.757575758	0.000000000	0.266129032	1.000000000	8	6	False	GYS2	11.000000000	0	8	0	0.929292929	False	0	GYS2	0	0.500000000
3.757575758	0.000000000	0.266129032	1.000000000	8	6	False	GYG2	11.000000000	0	8	0	0.929292929	False	0	GYG2	0	0.500000000
3.757575758	0.000000000	0.266129032	1.000000000	8	6	False	GYG1	11.000000000	0	8	0	0.929292929	False	0	GYG1	0	0.500000000
2.994949495	0.000599000	0.333895447	0.714285714	8	4	False	BPGM	14.000000000	0	8	0	0.948847449	False	0	BPGM	202	0.308333333
2.959595960	0.001065787	0.337883959	0.571428571	8	5	False	FBP1	14.625000000	0	8	0	0.949753950	False	0	FBP1	630	0.332386364
3.121212121	0.002172099	0.320388350	0.571428571	8	5	False	MTHFD1	12.500000000	0	8	0	0.945609946	False	0	MTHFD1	640	0.309375000
2.858585859	0.000750000	0.349823322	0.535714286	8	4	False	NIT2	17.625000000	0	8	0	0.952343952	False	0	NIT2	230	0.312500000
2.702020202	0.014684784	0.370093458	0.333333333	7	4	False	AADAT	15.428571430	0	7	0	0.956358456	False	0	AADAT	3402	0.221532091
2.898989899	0.013030086	0.344947735	0.476190476	7	4	False	KYNU	12.571428570	0	7	0	0.951307951	False	0	KYNU	3280	0.239010989
2.772727273	0.001028840	0.360655738	0.285714286	7	4	False	ALDH5A1	17.142857140	0	7	0	0.954545455	False	0	ALDH5A1	492	0.267857143
3.090909091	0.003392269	0.323529412	0.571428571	7	5	False	OTC	11.714285710	0	7	0	0.946386946	False	0	OTC	1598	0.272425249
2.671717172	0.001381598	0.374291115	0.619047619	7	4	False	HOGA1	23.571428570	0	7	0	0.957135457	False	0	HOGA1	382	0.322896282
3.166666667	0.002002043	0.315789474	0.476190476	7	4	False	G6PC2	11.714285710	0	7	0	0.944444444	False	0	G6PC2	636	0.377880184
3.040404040	0.000557000	0.328903654	0.666666667	7	5	False	CPS1	14.857142860	0	7	0	0.947681948	False	0	CPS1	264	0.297142857
3.181818182	0.005264583	0.314285714	0.380952381	7	5	False	GCH1	10.428571430	0	7	0	0.944055944	False	0	GCH1	1352	0.228571429
3.348484848	0.000097600	0.298642534	0.809523810	7	5	False	MTHFD1L	12.285714290	0	7	0	0.939782440	False	0	MTHFD1L	36	0.472527473
3.368686869	0.000988000	0.296851574	0.285714286	7	5	False	HSD17B6	7.857142857	0	7	0	0.939264439	False	0	HSD17B6	914	0.266009852
2.994949495	0.001877391	0.333895447	0.533333333	6	5	False	MCEE	15.166666670	0	6	0	0.948847449	False	0	MCEE	586	0.312500000
3.217171717	0.000686000	0.310832025	0.333333333	6	5	False	UGT1A8	14.000000000	0	6	0	0.943149443	False	0	UGT1A8	202	0.354700855
3.247474747	0.000293000	0.307931571	0.400000000	6	5	False	UGT2B17	14.166666670	0	6	0	0.942372442	False	0	UGT2B17	498	0.393518519
3.191919192	0.001025812	0.313291139	0.533333333	6	5	False	AK3	12.666666670	0	6	0	0.943796944	False	0	AK3	412	0.287878788
3.267676768	0.000991000	0.306027821	0.400000000	6	5	False	AK4	10.166666670	0	6	0	0.941854442	False	0	AK4	262	0.327777778
2.858585859	0.010101010	0.349823322	0.666666667	6	5	False	ALAS1	18.833333330	0	6	0	0.952343952	False	0	ALAS1	1772	0.339393939
3.393939394	0.000073000	0.294642857	0.800000000	6	5	False	NME7	9.833333333	0	6	0	0.938616939	False	0	NME7	20	0.351190476
2.979797980	0.010139187	0.335593220	0.200000000	6	5	False	AKR1A1	22.000000000	0	6	0	0.949235949	False	0	AKR1A1	5788	0.565789474
2.823232323	0.008143421	0.354203936	0.200000000	6	4	False	PAH	16.000000000	0	6	0	0.953250453	False	0	PAH	1946	0.262711864
2.964646465	0.003299102	0.337308348	0.200000000	6	4	False	EPRS	13.833333330	0	6	0	0.949624450	False	0	EPRS	770	0.272108844
3.257575758	0.000291000	0.306976744	0.400000000	6	5	False	AUH	14.000000000	0	6	0	0.942113442	False	0	AUH	112	0.358974359
3.075757576	0.003401354	0.325123153	0.066666667	6	5	False	DPYD	9.000000000	0	6	0	0.946775447	False	0	DPYD	882	0.193798450
3.459595960	0.000273000	0.289051095	0.900000000	5	5	False	KMO	6.200000000	0	5	0	0.936933437	False	0	KMO	182	0.516666667
3.459595960	0.000273000	0.289051095	0.900000000	5	5	False	TDO2	6.200000000	0	5	0	0.936933437	False	0	TDO2	182	0.516666667
2.853535354	0.001303615	0.350442478	0.200000000	5	4	False	ACO1	17.000000000	0	5	0	0.952473452	False	0	ACO1	372	0.284745763
3.090909091	0.000019600	0.323529412	0.800000000	5	5	False	MMAB	17.200000000	0	5	0	0.946386946	False	0	MMAB	12	0.382222222
3.222222222	0.000476000	0.310344828	0.400000000	5	5	False	UGT1A6	14.000000000	0	5	0	0.943019943	False	0	UGT1A6	140	0.353846154
3.252525253	0.000438000	0.307453416	0.600000000	5	5	False	UGT2B10	13.400000000	0	5	0	0.942242942	False	0	UGT2B10	672	0.372222222
3.686868687	0.000151000	0.271232877	0.500000000	5	5	False	UGT2B11	8.600000000	0	5	0	0.931105931	False	0	UGT2B11	238	0.505882353
3.484848485	0.000017100	0.286956522	0.833333333	4	5	False	BDH1	11.000000000	0	4	0	0.936285936	False	0	BDH1	2	0.478260870
2.914141414	0.000170000	0.343154246	0.500000000	4	5	False	DCXR	17.750000000	0	4	0	0.950919451	False	0	DCXR	146	0.362244898
3.510101010	0.000466000	0.284892086	0.666666667	4	5	False	ARG1	9.250000000	0	4	0	0.935638436	False	0	ARG1	182	0.402173913
3.257575758	0.000128000	0.306976744	0.500000000	4	5	False	UGT2B28	15.250000000	0	4	0	0.942113442	False	0	UGT2B28	242	0.423611111
3.257575758	0.000378000	0.306976744	0.666666667	4	5	False	UGT2B7	13.500000000	0	4	0	0.942113442	False	0	UGT2B7	554	0.375000000
2.797979798	0.000713000	0.357400722	0.333333333	4	4	False	RPIA	21.000000000	0	4	0	0.953897954	False	0	RPIA	368	0.350000000
2.929292929	0.002890136	0.341379310	0.500000000	4	4	False	HPD	19.250000000	0	4	0	0.950530951	False	0	HPD	682	0.413043478
3.757575758	0.000000000	0.266129032	1.000000000	4	5	False	IDO2	6.250000000	0	4	0	0.929292929	False	0	IDO2	0	0.694444444
3.151515152	0.002431864	0.317307692	0.500000000	4	5	False	LDHD	11.000000000	0	4	0	0.944832945	False	0	LDHD	388	0.316176471
3.489898990	0.000000000	0.286541245	1.000000000	3	5	False	BDH2	11.333333330	0	3	0	0.936156436	False	0	BDH2	0	0.492753623
3.712121212	0.000132000	0.269387755	0.333333333	3	5	False	ACY1	8.333333333	0	3	0	0.930458430	False	0	ACY1	58	0.444444444
3.696969697	0.000112000	0.270491803	0.000000000	3	5	False	UGT2B4	11.333333330	0	3	0	0.930846931	False	0	UGT2B4	234	0.738095238
2.888888889	0.000000000	0.346153846	1.000000000	3	4	False	HYI	25.666666670	0	3	0	0.951566952	False	0	HYI	0	0.523809524
3.176767677	0.003417015	0.314785374	0.000000000	3	5	False	TPK1	9.000000000	0	3	0	0.944185444	False	0	TPK1	880	0.347826087
3.141414141	0.000000000	0.318327974	1.000000000	3	5	False	PYCR2	16.000000000	0	3	0	0.945091945	False	0	PYCR2	0	0.444444444
3.141414141	0.000000000	0.318327974	1.000000000	3	5	False	PYCR1	16.000000000	0	3	0	0.945091945	False	0	PYCR1	0	0.444444444
3.909090909	0.000000000	0.255813953	1.000000000	3	5	False	DAK	12.000000000	0	3	0	0.925407925	False	0	DAK	0	1.000000000
3.762626263	0.000739000	0.265771812	0.333333333	3	5	False	ALPL	9.333333333	0	3	0	0.929163429	False	0	ALPL	44	0.375000000
3.429292929	0.000000000	0.291605302	1.000000000	3	5	False	GFPT1	15.000000000	0	3	0	0.937710438	False	0	GFPT1	0	0.600000000
3.510101010	0.000000000	0.284892086	1.000000000	3	6	False	MAT1A	11.333333330	0	3	0	0.935638436	False	0	MAT1A	0	0.566666667
3.191919192	0.000000000	0.313291139	1.000000000	3	5	False	ME2	14.333333330	0	3	0	0.943796944	False	0	ME2	0	0.421568627
3.666666667	0.000000000	0.272727273	1.000000000	2	5	False	GALM	9.500000000	0	2	0	0.931623932	False	0	GALM	0	0.558823529
3.237373737	0.000362000	0.308892356	0.000000000	2	5	False	DHODH	15.000000000	0	2	0	0.942631443	False	0	DHODH	120	0.500000000
3.070707071	0.000000000	0.325657895	1.000000000	2	5	False	CSAD	32.500000000	0	2	0	0.946904947	False	0	CSAD	0	0.855263158
3.479797980	0.000000000	0.287373004	1.000000000	2	6	False	DPYS	10.000000000	0	2	0	0.936415436	False	0	DPYS	0	0.555555556
3.621212121	0.003345342	0.276150628	0.000000000	2	5	False	NAPRT	13.000000000	0	2	0	0.932789433	False	0	NAPRT	244	0.500000000
3.555555556	0.000688000	0.281250000	0.000000000	2	5	False	HAGH	7.500000000	0	2	0	0.934472934	False	0	HAGH	82	0.500000000
3.373737374	0.000000000	0.296407186	1.000000000	2	5	False	TREH	12.500000000	0	2	0	0.939134939	False	0	TREH	0	0.657894737
3.328282828	0.000000000	0.300455235	0.000000000	1	5	False	ACSM5	31.000000000	0	1	0	0.940300440	False	0	ACSM5	0	0.000000000
3.328282828	0.000000000	0.300455235	0.000000000	1	5	False	ACSM2A	31.000000000	0	1	0	0.940300440	False	0	ACSM2A	0	0.000000000
3.328282828	0.000000000	0.300455235	0.000000000	1	5	False	ACSM2B	31.000000000	0	1	0	0.940300440	False	0	ACSM2B	0	0.000000000
3.328282828	0.000000000	0.300455235	0.000000000	1	5	False	ACSM3	31.000000000	0	1	0	0.940300440	False	0	ACSM3	0	0.000000000
3.671717172	0.000000000	0.272352132	0.000000000	1	5	False	ACYP2	13.000000000	0	1	0	0.931494431	False	0	ACYP2	0	0.000000000
3.974747475	0.000000000	0.251588310	0.000000000	1	6	False	CRYL1	6.000000000	0	1	0	0.923724424	False	0	CRYL1	0	0.000000000
3.722222222	0.000000000	0.268656716	0.000000000	1	5	False	DHDH	12.000000000	0	1	0	0.930199430	False	0	DHDH	0	0.000000000
3.853535354	0.000000000	0.259501966	0.000000000	1	6	False	ALAD	6.000000000	0	1	0	0.926832427	False	0	ALAD	0	0.000000000
3.409090909	0.000000000	0.293333333	0.000000000	1	5	False	GPHN	28.000000000	0	1	0	0.938228438	False	0	GPHN	0	0.000000000
3.409090909	0.000000000	0.293333333	0.000000000	1	5	False	PHOSPHO2	28.000000000	0	1	0	0.938228438	False	0	PHOSPHO2	0	0.000000000
3.409090909	0.000000000	0.293333333	0.000000000	1	5	False	DHRS3	28.000000000	0	1	0	0.938228438	False	0	DHRS3	0	0.000000000
3.409090909	0.000000000	0.293333333	0.000000000	1	5	False	RDH12	28.000000000	0	1	0	0.938228438	False	0	RDH12	0	0.000000000
3.813131313	0.000000000	0.262251656	0.000000000	1	5	False	FOLH1	14.000000000	0	1	0	0.927868428	False	0	FOLH1	0	0.000000000
3.989898990	0.000000000	0.250632911	0.000000000	1	6	False	FLAD1	18.000000000	0	1	0	0.923335923	False	0	FLAD1	0	0.000000000
3.989898990	0.000000000	0.250632911	0.000000000	1	6	False	PANK1	18.000000000	0	1	0	0.923335923	False	0	PANK1	0	0.000000000
3.989898990	0.000000000	0.250632911	0.000000000	1	6	False	NADK2	18.000000000	0	1	0	0.923335923	False	0	NADK2	0	0.000000000
3.717171717	0.000000000	0.269021739	0.000000000	1	6	False	GGH	14.000000000	0	1	0	0.930328930	False	0	GGH	0	0.000000000
3.717171717	0.000000000	0.269021739	0.000000000	1	6	False	LIAS	14.000000000	0	1	0	0.930328930	False	0	LIAS	0	0.000000000
1.000000000	0.000000000	1.000000000	0.000000000	1	1	False	IDNK	1.000000000	0	1	0	1.000000000	False	0	IDNK	0	0.000000000
1.000000000	0.000000000	1.000000000	0.000000000	1	1	False	RGN	1.000000000	0	1	0	1.000000000	False	0	RGN	0	0.000000000
Cytoscape calculated each node in the protein-protein interaction network using several kinds of algorithms.
